# Supplementary material for: Integrative analysis of single-cell and bulk RNA seq to reveal the prognostic model and tumor microenvironment remodeling mechanisms of cuproptosis-related genes in colorectal cancer
Source: Aging (Albany NY). 2023 Dec 8;15(23):14422–44. doi: 10.18632/aging.205324 (PMC10756095; doi:10.18632/aging.205324)
Supplement: Supplementary Table 1 [file aging-15-205324-s002.xlsx]

## Sheet: 61-表达谱
Supplementary Table 1. The expression of 61 CRGs in the TCGA cohort.
Gene	TCGA-CA-5256-01	TCGA-AZ-6599-01	TCGA-AA-3655-01	TCGA-A6-6137-01	TCGA-CK-4952-01	TCGA-A6-5657-01	TCGA-AD-6963-01	TCGA-AA-3663-11	TCGA-A6-6138-01	TCGA-A6-A567-01	TCGA-AA-3712-11	TCGA-D5-6928-01	TCGA-AZ-6598-01	TCGA-D5-6931-01	TCGA-G4-6295-01	TCGA-AA-A01X-01	TCGA-AZ-4313-01	TCGA-DM-A0XD-01	TCGA-D5-6535-01	TCGA-AA-3509-01	TCGA-DM-A28E-01	TCGA-A6-5667-11	TCGA-G4-6307-01	TCGA-A6-2682-01	TCGA-CM-5868-01	TCGA-CK-4947-01	TCGA-D5-5540-01	TCGA-A6-4105-01	TCGA-A6-6651-01	TCGA-G4-6625-01	TCGA-CM-5860-01	TCGA-DM-A28G-01	TCGA-A6-5666-01	TCGA-A6-2675-11	TCGA-AA-3516-11	TCGA-AZ-6605-01	TCGA-CA-5797-01	TCGA-D5-6930-01	TCGA-5M-AAT4-01	TCGA-AA-3685-01	TCGA-D5-6924-01	TCGA-CA-6718-01	TCGA-AZ-6603-01	TCGA-CM-5862-01	TCGA-AZ-6598-11	TCGA-AA-A01Z-01	TCGA-DM-A0X9-01	TCGA-A6-A566-01	TCGA-A6-5662-11
PDK1	9.3809	7.7952	8.4227	8.9788	9.7194	7.9204	8.6927	8.7404	8.6857	9.1467	9.6722	9.2345	8.8504	10.2297	9.6911	9.6253	8.9237	8.8887	9.0299	8.7944	8.2505	8.7371	7.93	10.004	8.5734	9.4062	9.9	9.2719	8.345	8.8311	7.7733	8.8155	9.7675	8.3763	9.4734	8.7797	8.0752	8.3868	9.1402	9.9426	8.9536	7.5418	7.7353	8.7713	8.236	8.5616	8.9673	9.6768	8.5249
DAXX	10.2649	10.3479	9.8981	10.5093	10.8148	10.5977	10.7303	10.3298	10.9795	10.403	10.2502	10.6259	10.7075	10.2999	10.7997	9.7729	10.6272	10.6406	10.8432	10.3093	10.4486	10.4238	10.6148	10.8154	10.8725	10.4633	10.7679	10.5939	10.6708	10.9487	10.6387	10.1414	10.5729	10.2977	10.3995	10.4629	10.5911	10.7862	10.6631	10.3723	10.4843	10.6605	10.5541	10.4495	10.3703	10.6975	10.3426	10.3763	10.3045
APP	14.066	15.5165	14.5334	14.6919	14.3481	14.3688	13.8131	14.4628	15	14.0597	14.2561	14.0483	14.3249	14.1405	13.8441	14.9297	14.0884	13.7869	14.6157	14.1442	14.5987	14.6808	14.9233	13.9366	14.8375	14.4357	14.4995	13.8071	14.6476	14.1201	14.0794	15.2251	15.0734	14.4796	14.2235	14.6183	14.2727	14.8835	14.2668	13.586	14.7497	14.2195	14.5704	14.0782	14.2743	14.0925	14.4955	14.2673	14.4975
TYR	0	0	0	0	0	0.3836	0	0	0	0	0	0	0	0	0	0.952	0	0	0	2.2931	0	0	0	0	0	0	0	0	0	0.5395	0	0.5447	0	0	0	0.5773	0	0	0	0.5691	0.7325	0	0	0	0	0	0	0	0
CD274	3.1579	3.78	4.9604	4.9755	4.7654	4.3356	4.6564	4.0457	6.5591	3.6297	4.3602	8.797	4.3146	5.3817	5.1499	3.0017	3.8318	3.0824	5.8335	4.557	2.9515	4.1399	2.0008	4.4995	2.9653	4.0193	3.9799	6.0241	5.35	6.4154	4.5463	2.2233	2.9303	3.3109	5.1688	4.5928	3.6903	5.3313	3.1285	5.5074	5.7169	8.2078	5.6226	2.0936	4.1306	2.5163	3.8248	5.2399	4.0538
MAP1LC3A	9.5862	8.3124	7.9412	9.0101	7.0576	8.2454	8.8181	8.9146	7.9973	9.178	8.3301	7.9013	7.0931	7.5907	9.2363	8.9794	8.4894	9.135	7.8904	8.0331	10.3592	8.9194	9.6539	9.0889	9.4555	7.5036	8.9472	9.5731	9.0302	9.4528	8.0986	8.5625	8.7169	8.661	8.7438	8.89	7.9613	8.2996	8.6983	8.3761	8.9066	6.4003	9.5207	8.0643	9.1393	8.0888	9.0509	8.7335	8.7876
HSF1	11.0705	11.1162	10.9711	11.5738	12.1079	11.9328	11.6645	10.9325	11.0164	11.2305	10.5196	10.4236	10.9991	10.8046	12.1198	10.9354	10.9524	10.7666	10.9619	11.0689	11.2105	10.6187	12.6851	11.2042	11.2431	10.3448	10.1961	10.7354	11.0128	10.5775	10.8762	11.2981	10.9426	10.7483	10.5552	10.9869	11.3075	10.886	11.4509	11.3679	11.1636	11.0316	11.2042	12.3244	10.8097	11.6538	10.7801	10.3003	10.6028
PRND	2.768	0	2.6087	4.1387	2.8359	3.2977	1.2654	5.0014	3.1941	3.2134	1.0203	4.4224	1.3895	1.7392	1.7781	3.0835	2.9297	3.2333	0.5726	2.2931	0.9246	2.6384	2.2024	4.6841	4.6027	3.3039	0.6922	1.0181	5.7374	3.8229	4.9821	0.9392	3.2721	7.244	3.0978	4.9778	4.4242	4.7227	1.656	1.2932	3.049	3.4839	1.0683	2.0936	3.1373	1.6535	1.3819	7.7006	5.0587
ARF1	13.3342	13.6679	13.5121	13.4406	13.6119	13.4097	13.6305	13.4915	13.3623	13.4107	13.523	13.0223	13.6672	13.4617	13.0278	14.2107	14.1453	13.6531	13.6912	14.2763	13.5071	13.6253	13.6864	13.6909	13.4527	13.2717	13.4602	13.7689	13.4307	13.3151	13.3383	13.2509	13.5202	13.3361	13.8669	13.3297	13.6113	13.7727	13.4369	13.8024	13.2563	13.334	13.047	13.7564	13.5021	13.5782	13.8592	13.3899	13.3442
COX19	8.5132	8.7691	9.131	8.6178	8.5993	8.7732	9.5144	8.2515	8.983	8.5749	8.6756	9.4055	9.4017	8.3922	8.9781	9.6904	9.0424	9.4699	9.3266	8.68	8.9625	8.5986	9.4789	8.419	9.4303	8.8504	8.7631	8.9564	8.9167	8.7558	8.7251	9.0174	8.4392	8.2561	8.475	8.7557	9.5847	8.3173	9.3269	8.9576	9.4972	9.4986	9.6263	9.5959	8.6149	9.8432	8.7697	8.811	8.2336
COX11	11.0112	10.0271	9.3259	9.8752	9.9295	8.9486	9.5762	9.6597	9.9796	9.3734	9.7458	9.256	10.3244	10.4347	10.1918	9.813	10.7518	9.7428	10.1774	10.255	9.5864	9.5466	10.1411	10.0058	10.3865	9.9469	11.5399	10.7594	10.057	10.0035	10.2029	10.3523	11.3963	9.7293	9.6955	10.0626	10.1577	10.3404	9.8248	10.4934	9.9194	9.7279	9.6772	10.3594	10.3303	10.3037	10.0836	10.1677	9.9562
COX17	9.6273	8.9769	8.8086	8.7871	8.7509	9.0683	9.6271	8.6954	9.2573	9.3729	9.2225	8.624	9.263	8.6755	8.8154	9.1552	10.0875	9.6786	9.6314	9.1931	9.2683	8.9516	9.744	9.2933	9.899	8.659	9.8128	8.8024	9.1783	8.8998	8.9576	8.9066	9.5853	8.6531	9.5982	9.2648	8.9703	9.43	9.9851	10.099	9.4115	8.7003	9.2754	9.3327	8.7815	8.9797	9.0657	9.2458	9.1237
PDHA1	11.2091	10.4762	11.5979	11.7518	11.1516	11.4863	12.0687	11.5574	10.7403	11.5	11.3988	10.615	10.7112	10.7768	10.7088	11.5885	11.0194	12.4172	11.4916	11.7699	11.5138	11.6335	12.6379	11.3445	11.8339	11.0821	10.5374	11.8107	11.2048	11.5759	11.3725	12.1074	12.3541	11.156	11.1931	11.2401	12.1532	10.782	12.5359	11.5995	12.0683	11.0614	12.0916	10.8559	11.7079	12.785	12.7935	10.8142	11.3273
GLS	11.0742	10.242	10.7606	10.6302	10.5185	10.8358	11.2969	10.5276	11.2857	12.0128	10.3756	11.0581	10.3904	10.2207	12.5828	11.3608	10.5137	10.991	10.8965	10.7696	11.6181	10.3432	9.4442	11.0468	10.6467	11.0462	12.2787	11.6172	10.827	11.3141	11.6662	10.6903	11.9866	10.8184	10.401	11.1259	10.7904	10.0066	11.0391	11.4336	11.1513	10.3693	10.9943	12.1346	10.1239	11.0104	10.9252	11.008	10.5453
LIAS	8.9727	7.8881	7.768	8.0064	8.1614	7.478	8.0629	7.9614	6.9082	6.8165	8.1616	7.9116	7.0467	7.6986	7.2721	7.4421	8.3395	8.7749	7.1023	7.942	8.242	8.089	8.5347	7.9121	8.2405	8.2421	8.2795	7.2789	7.2772	6.6614	8.2541	8.6292	8.9217	7.583	7.8138	7.8781	7.1765	7.8468	8.2658	8.4774	7.1687	8.625	7.3679	9.9213	8.18	8.1401	8.1757	7.6832	8.1421
LIPT1	7.5589	6.6334	6.2322	6.1149	6.2226	6.1881	6.9715	6.6618	6.6465	6.8813	6.4576	6.9991	6.075	5.9381	6.8841	7.521	6.2691	6.3862	6.4433	6.3887	6.6277	6.2195	6.8864	6.9296	6.7274	6.439	7.9097	6.7417	6.1141	6.3447	6.4122	7.1464	6.6692	6.6204	6.0983	6.5454	6.2077	6.1586	6.7091	7.7583	6.8592	7.0583	6.7803	7.9563	5.9862	6.4528	6.9006	6.3976	6.5941
AOC3	6.3073	6.8407	7.1863	7.9429	6.5021	10.8757	6.7128	12.7228	8.7569	9.341	10.148	9.7939	8.3224	9.06	7.4145	9.7203	6.9644	7.876	6.7701	8.0017	5.0781	10.8545	7.0333	9.9836	9.7841	8.9976	6.2267	7.8592	12.3634	9.1062	9.1862	7.7342	7.2794	13.2368	11.1088	10.1458	9.3939	9.3313	7.4815	7.3096	9.7059	9.6189	9.5342	8.4938	12.3089	7.1947	7.42	10.0178	12.7287
MT1H	3.9812	0.5941	5.7633	5.2967	5.9444	2.6272	3.2363	7.2017	2.2089	3.3659	8.8651	4.7308	4.0107	8.3919	4.891	3.7169	6.0291	4.3653	1.2995	2.4154	0	9.0964	2.4603	4.9948	3.3162	2.8757	3.2661	6.1647	5.3201	3.625	4.5463	4.0528	2.7233	10.6087	11.3771	4.5017	2.4505	7.7182	3.7979	6.4199	5.8218	3.5816	5.0836	3.7461	9.5044	2.8091	3.7232	4.9797	8.4487
MT1X	8.9435	7.0269	8.1951	7.845	8.9961	8.3393	8.5296	8.5165	6.8357	7.9189	10.9676	8.1997	9.0146	9.9338	9.5552	7.7732	9.5534	9.7916	5.9964	6.411	5.7425	11.3095	7.3337	8.4909	8.7167	7.5661	8.0607	8.9886	9.0924	7.1685	8.5061	8.0028	6.5965	10.867	11.68	8.4201	7.0485	10.063	7.3956	9.2081	8.2819	8.7576	8.1274	8.1597	11.1788	8.2316	7.8498	7.9318	10.469
MT1M	1.3702	1.0136	7.0107	5.4869	1.6072	5.1589	3.3892	6.5922	2.467	4.506	10.2319	3.7842	3.9106	8.8755	5.4834	3.9529	5.3969	2.9139	0.9813	2.2931	0.9246	10.7155	0.6784	5.4159	5.9358	2.6021	2.4088	5.543	5.6439	4.5653	3.8021	1.5033	2.1909	11.1139	11.9967	5.7589	1.85	8.7048	2.4068	6.0817	5.8386	2.0478	5.4402	2.9138	10.8635	4.0019	1.1921	4.2542	9.9998
MT1E	7.977	4.754	11.1899	8.3846	7.8849	8.4875	10.1986	10.176	5.5041	6.4232	12.2633	8.1335	8.4769	10.5602	10.166	6.755	10.5304	10.4234	4.5186	5.9468	3.3191	11.9033	6.9517	8.3524	9.434	8.8834	7.0595	8.9769	7.8088	7.8198	8.2898	7.5974	6.9515	12.0009	13.0484	9.1805	5.338	12.1878	6.8831	9.5302	10.0846	8.7419	8.6103	6.2386	12.6599	7.6262	6.629	9.9255	11.5809
MT1F	7.9025	4.2736	7.2136	7.4008	4.7213	5.6095	6.3774	7.6113	5.3364	6.0704	10.1323	6.1466	6.2693	8.9332	7.4905	6.4504	6.3632	7.3653	3.9191	4.4751	4.245	10.3771	5.407	6.6264	7.4439	6.2035	5.1238	6.9365	7.2616	5.6168	6.4418	5.7727	5.3482	10.6534	11.5181	7.1522	5.4405	8.7008	5.8094	7.585	8.3768	5.3838	7.4756	6.108	10.5448	5.7493	5.3403	7.8248	9.5229
MT1G	10.1482	5.4188	10.0484	9.2245	9.0439	6.8522	9.3072	10.4098	4.9491	6.9673	12.3907	7.9318	7.99	11.3355	9.2922	7.4954	9.5415	10.1861	3.2882	5.5662	2.6755	12.6502	6.4848	8.6838	8.8793	8.3357	6.3732	9.2957	8.9868	7.2308	7.9382	8.1844	7.0711	13.1007	13.6643	8.3215	6.4608	11.4527	8.5751	10.0306	10.4451	5.6658	9.0933	7.3437	12.8682	8.0425	7.8193	9.3514	11.7497
MT1A	2.6515	3.2722	7.1444	4.1387	0.495	2.8262	4.6362	2.3722	1.4914	3.0428	5.885	0	0.6229	4.5801	1.7781	5.3477	5.1883	6.26	0	2.7301	1.2309	6.0973	0.9265	5.8867	6.5354	5.8699	2.0281	4.9417	4.861	0.5395	2.7836	4.308	1.603	6.9315	5.33	1.791	0.4565	6.8054	5.2317	5.3452	6.5072	0.477	2.1013	3.0338	5.4635	2.2818	3.6139	7.3608	6.0732
SCO1	8.7919	9.0355	8.5882	8.8791	9.2176	8.5082	9.219	9.7061	8.2628	8.4874	9.5088	9.1591	9.2439	9.5567	8.1139	9.4202	9.2836	8.8672	8.7074	8.6352	7.8371	9.4062	8.8549	9.4114	8.8847	9.8858	8.585	8.8481	9.088	8.9148	9.4614	9.7744	8.6797	9.2408	9.6183	8.832	9.3819	9.6156	9.4067	9.2738	8.5825	9.6044	8.7528	8.5801	9.6367	9.0029	9.9961	9.2736	9.3365
CCS	8.516	8.7379	8.5654	8.6329	8.2021	8.6219	8.7954	9.0844	7.8857	9.0174	9.016	8.827	8.8805	8.5622	8.9074	9.5163	8.5742	9.5197	8.0763	8.6694	8.5749	9.2752	9.9291	8.8857	8.9881	7.846	8.2122	8.3073	8.9469	8.8181	8.7326	8.97	8.7599	8.856	9.3366	8.6407	9.3722	9.3326	9.2173	9.0273	8.629	9.1468	8.6463	8.7073	9.3758	8.7387	9.1732	8.8394	9.1093
DLAT	10.5317	9.7525	10.4997	10.279	10.5464	10.1705	10.3247	10.7068	10.1995	10.5985	10.4842	10.1142	10.2928	10.3316	10.6728	10.3619	10.9566	10.0837	10.2776	10.4501	10.4565	10.6712	10.2005	10.3462	10.5104	10.9738	10.7552	10.1763	9.7255	10.1992	10.3113	10.8803	11.1446	10.3224	10.0608	10.1332	10.902	10.163	10.5263	10.4194	9.7859	10.249	10.2777	9.8701	10.5637	11.3879	10.4993	10.4444	10.3915
ABCB6	9.1201	9.5452	8.3503	7.9632	9.6881	8.4093	9.927	8.477	8.6046	8.8905	7.5374	8.6035	8.1809	8.1808	8.9815	8.3302	10.0811	8.7269	7.8473	8.6496	9.4038	7.9613	8.8069	8.4422	8.0416	7.612	7.7397	7.7613	9.1331	9.1141	7.973	8.344	8.4559	7.7932	7.79	7.879	8.9478	9.0692	8.6697	9.6598	8.516	10.0459	8.2519	9.5547	8.5748	8.5596	9.0302	8.4665	7.9323
PDHB	10.9514	9.8897	10.0158	9.9866	10.2724	9.5467	10.3362	10.6339	10.2149	10.7553	10.48	9.7912	9.7911	10.3316	10.5947	10.4216	11.0052	10.0383	9.2594	9.9014	10.2201	10.3935	10.5651	10.5936	11.0955	10.8291	11.3196	9.868	10.0426	10.1807	10.4243	10.9927	10.7425	10.514	10.2779	10.3844	10.3663	10.1142	9.8777	10.8947	9.8295	10.0183	10.2979	9.4343	10.2241	10.6613	10.5589	10.502	10.5682
ANKRD9	7.9496	8.0522	6.7185	9.0178	6.158	7.6607	7.277	8.2822	6.2936	5.9787	8.8667	7.3882	6.4494	7.109	7.467	6.2346	7.2905	6.517	7.5095	7.1919	7.7968	8.8587	9.0924	7.3178	6.7855	6.624	5.5973	7.0801	7.0545	7.7757	6.3511	8.5017	6.4778	7.6121	8.7342	6.6427	6.9477	7.1718	8.8432	7.9321	7.5862	6.7066	7.4547	6.5314	8.3458	7.7406	7.3278	6.5045	7.1098
PRNP	10.6436	6.3666	10.2721	10.2737	8.282	10.7509	10.7586	11.9981	10.0116	11.1115	10.2999	10.8631	11.0364	10.7602	10.341	11.0477	9.6934	10.3139	10.3106	9.6208	9.5542	10.1636	10.349	10.8541	10.7024	9.5019	9.9988	10.1174	11.7178	10.0192	10.6982	8.3838	9.9331	12.607	10.9201	10.7768	11.5426	10.399	10.9987	10.7847	10.55	10.8485	11.2477	8.9966	11.3727	9.8851	11.3246	10.4372	12.7054
GCSH	6.6486	4.3477	4.4195	5.2796	3.686	5.4777	6.0734	3.5535	3.1941	4.2942	2.2013	2.3948	3.4221	5.1917	6.4751	5.6186	5.954	5.2076	4.0939	5.8086	4.8044	2.6384	6.2771	5.3628	5.9188	3.6819	6.2734	5.8933	5.1771	5.2204	2.7836	4.5532	5.581	2.8349	2.3932	5.6069	4.7968	4.9005	5.5559	5.8474	3.69	5.4756	5.5343	4.1694	2.5961	5.2115	5.6574	4.3455	2.7168
SLC31A1	10.98	10.3085	10.6079	10.7599	10.9861	10.7993	10.7941	10.0886	11.1305	10.0058	10.4596	10.7323	10.4821	10.6901	11.1308	10.5084	11.4542	10.4066	10.8247	10.7574	11.0705	10.5689	9.8729	11.0559	10.7494	10.7717	11.4128	11.2362	10.0855	11.2193	10.7988	10.5679	10.6109	10.3293	11.2355	10.2392	10.245	10.7758	10.6665	10.5508	10.4574	11.3973	10.4625	10.9627	10.3777	10.9078	10.0333	10.7956	10.1956
DLD	11.7388	10.5682	11.4642	11.1136	10.512	11.0448	11.3194	11.7457	11.6095	11.3202	11.3345	10.7193	10.6261	10.8533	10.8856	11.8218	11.841	11.1183	11.3217	11.0479	10.9535	11.5684	10.8223	11.2592	11.0185	11.9742	11.1772	10.795	11.0899	11.2283	11.9924	11.6441	11.4675	11.5032	11.3753	11.1648	11.4674	10.862	11.5438	11.4176	10.9653	10.7577	10.9582	11.3668	11.5292	11.9024	11.5272	11.5358	11.6576
SLC31A2	7.6938	5.9215	6.9417	7.8962	7.2209	6.8823	7.1929	8.5282	8.4218	6.7488	9.1156	9.3283	8.0293	7.2172	7.4227	5.737	8.6677	6.5533	7.0071	6.8724	5.403	8.4811	7.0725	7.9274	7.8547	7.7865	6.8674	8.3374	8.5779	8.4853	8.1322	6.424	6.6487	7.4605	9.2675	7.872	7.2453	7.2722	7.1685	8.2783	7.8488	8.3823	7.7983	6.9374	8.7979	6.3894	6.1438	8.8531	8.4783
CP	4.555	2.7887	1.919	3.1435	6.1804	4.7039	0.7672	8.8371	10.0907	3.0643	8.6873	9.1727	8.9364	5.6681	4.0348	4.3749	2.9607	2.9095	3.8947	5.5407	0.5351	7.864	1.9034	2.8922	2.6897	3.7762	5.061	4.9651	6.0285	6.1652	4.0224	2.3179	1.0707	8.9954	6.0915	4.7606	1.85	6.2637	1.8647	4.5708	2.8423	2.9912	4.502	1.3163	9.2616	0.9528	0.4018	4.909	8.335
CDKN2A	7.79	4.9331	7.5026	4.7216	5.5872	8.0015	6.2164	3.9375	7.0081	2.3611	4.5303	6.6895	4.598	6.8471	6.5814	7.3459	7.1097	7.178	4.5787	5.5261	2.8652	3.7895	5.8738	6.007	6.0259	6.1271	3.735	7.3977	6.2313	6.0804	8.1652	6.7533	5.2742	4.1929	4.6766	6.6427	6.899	5.7425	5.718	6.2378	4.8136	8.7693	6.3987	7.4608	4.0923	7.3583	4.5927	6.0135	3.7293
MAP2K2	11.3008	11.3462	11.5023	11.5098	11.2421	12.1372	12.045	11.8976	11.6576	10.8003	11.7934	11.0124	10.8388	11.4463	10.7651	11.1512	11.7313	11.5235	11.3703	11.3271	11.8472	11.8992	11.6485	11.2559	11.2852	11.1281	11.3785	11.709	11.3867	11.4341	11.8712	11.1971	11.0873	11.3621	12.3415	11.371	10.699	11.694	11.8313	12.4251	11.1784	11.1603	11.2822	11.9718	11.9238	11.735	11.1565	11.004	11.5754
FDX1	9.4259	8.5584	8.7631	9.2908	9.5525	9.0715	8.8158	9.6385	8.9595	9.3548	9.3313	8.0663	8.8639	8.6165	9.2525	8.7465	9.8736	9.2177	8.7891	9.3373	9.2777	9.2359	9.2207	8.8248	9.3845	9.5891	9.8197	9.1431	8.7136	9.1541	9.7992	9.5061	9.2351	9.2207	10.0115	9.3908	9.3883	8.652	9.3325	9.9797	8.5005	8.7537	9.068	10.0951	9.4219	9.3752	9.6379	9.1221	9.6006
SOD1	12.0944	11.2965	11.7905	11.6452	11.8905	12.1428	12.2585	11.8511	11.8524	11.1402	11.5458	11.5185	12.9002	11.5793	11.0344	11.579	12.7077	12.6808	11.7975	11.8787	11.7333	11.637	12.6906	11.789	12.9399	11.7467	12.7503	11.6377	11.4846	11.6091	11.2929	11.8663	12.4905	11.5867	12.2725	11.8956	12.0122	12.7194	12.2865	12.0931	11.6094	11.8326	11.7053	12.0468	12.0923	12.9519	12.2936	11.9982	12.1526
ULK1	7.649	10.4814	9.0586	9.5937	10.2208	10.0182	9.2359	9.7019	9.3015	9.4896	9.7179	10.1987	9.5885	9.8883	9.5174	10.2655	9.1118	9.9048	9.7098	9.1129	9.4385	9.8378	9.8844	9.6657	9.1973	8.7354	8.4844	9.9652	10.2228	9.8388	9.1068	9.5615	8.5406	9.9056	9.456	9.8923	9.6079	9.1305	9.574	8.5867	9.9531	9.215	9.7339	8.9208	9.825	9.4048	9.6661	9.7307	9.5196
CCDC22	9.0106	9.2702	10.1978	9.8151	9.3391	9.9812	10.112	9.3683	9.252	9.4323	9.0578	9.1478	8.8854	9.2759	8.4589	9.7962	9.14	10.1387	9.4965	9.9916	9.1035	9.1893	9.5663	9.8128	9.453	8.9153	8.5983	9.8692	9.8114	9.7172	9.689	8.8748	9.981	9.0951	8.8595	9.4421	9.5349	9.7222	10.1508	10.0196	10.2642	9.334	10.2071	9.53	9.1999	10.1635	10.0468	8.7881	8.8926
BACE1	8.9043	9.0715	9.39	9.1207	8.2591	9.6667	8.2035	9.3289	8.8505	9.0515	8.9105	9.192	7.6534	8.7619	8.0279	9.3661	7.8912	7.9996	8.6438	9.9073	6.7043	8.9293	10.0804	9.5486	9.5523	9.3466	8.5873	9.3565	10.2764	9.3493	9.4371	8.3375	7.8115	9.6966	8.6089	10.1908	10.5767	9.1613	9.3592	8.6172	9.6272	8.8621	10.0022	8.6915	9.5342	8.9158	7.8007	10.292	9.1295
LOXL2	9.6069	6.8973	10.2833	10.1152	10.1868	11.7462	9.1958	9.4057	10.8335	9.7629	8.1537	10.4982	10.2458	11.1265	8.4864	9.8552	9.5534	10.4806	10.0807	10.111	7.9409	8.4001	8.9568	11.2322	10.3725	10.0819	9.4228	11.2294	11.2199	9.745	11.0889	8.9243	8.5795	9.486	8.6036	11.5533	10.643	11.0155	9.1877	9.6763	11.4176	10.9673	10.631	10.046	9.0371	9.2678	9.5516	12.5862	9.1747
BECN1	10.8062	11.0408	11.0527	11.609	10.0439	10.485	11.256	11.0424	10.8969	10.9796	11.213	10.4872	11.0957	10.6297	10.5676	11.1217	10.5747	11.0655	11.1452	10.8883	11.1339	11.3032	10.9992	10.8289	11.5224	11.2659	10.2201	10.6825	10.6837	10.8699	10.747	11.1664	11.9234	11.1091	11.5236	11.2402	10.751	10.9463	10.684	10.2151	11.3726	10.4757	11.3118	10.7195	11.1323	10.8936	10.8916	10.8059	11.2763
SLC25A3	13.1981	12.56	13.0139	12.8791	13.8108	13.4111	13.0552	13.5038	12.9751	13.021	13.3824	12.8976	13.1007	13.6461	13.3791	13.1918	13.5051	13.7309	12.8797	13.1447	13.3834	13.4076	12.9282	13.2487	12.9108	13.2036	13.8633	13.2478	13.0779	12.7602	13.5659	13.5322	13.154	13.359	13.6344	12.9669	13.2838	13.3014	13.3979	13.6339	12.8274	12.6794	12.6997	13.0659	13.2069	13.3912	13.7217	13.4272	13.4443
DBH	1.3702	0	2.0858	2.3656	0.8629	2.1212	3.0036	1.9941	0.9304	0	2.4924	5.8703	1.0565	1.9284	2.4259	3.5543	0	0.5528	2.9672	1.6633	0.5351	2.9358	0.9265	1.613	0	2.498	0.6922	3.618	2.2537	2.2104	1.1225	4.3733	1.3382	2.5896	1.5313	1.3082	0.4565	1.45	1.4442	0.5691	2.1068	6.1286	1.3002	0.7256	2.4822	0.5152	2.1807	2.7251	2.9428
DBT	9.7179	8.7803	9.0561	9.5176	8.9177	8.9918	9.0139	9.5344	8.5176	8.8752	9.195	8.9687	9.3165	9.1495	8.1855	8.3518	8.9181	8.939	8.298	8.3142	8.6283	9.1696	8.2883	9.4951	8.6956	9.6744	8.7196	8.3956	9.0394	8.3272	9.558	9.5242	9.7221	9.275	8.8091	8.7618	8.9102	8.5153	8.2249	8.5885	9.0102	8.9539	8.9091	9.0222	9.1809	9.0351	9.4585	8.9814	9.4431
DLST	10.8739	11.0949	11.4025	11.0428	11.6738	11.2591	10.7204	11.7765	10.3843	10.9044	11.673	11.2204	10.7965	11.5901	10.9044	10.715	11.9953	11.4522	10.504	11.1888	10.1932	11.6993	12.0364	11.5026	10.2973	11.672	10.6244	10.6757	11.1069	10.7889	11.0712	11.5028	11.4166	11.6305	11.6807	10.8643	11.4887	11.5614	11.4539	11.4346	10.4648	11.0542	10.258	11.0471	11.718	11.6424	11.6593	11.3103	11.6085
ATOX1	10.3884	8.3868	9.0192	8.2814	8.0184	8.9866	9.2976	8.9446	9.5921	9.241	8.7371	9.173	9.361	8.7416	8.8971	9.3372	9.4922	10.115	8.9109	9.875	8.5142	8.803	9.7103	9.605	9.3713	8.7181	9.8295	9.1574	9.2245	9.2646	9.6089	8.883	9.3634	8.5452	9.2508	9.4559	9.3915	9.4728	9.4356	10.3055	8.8269	8.9041	8.9113	9.2107	9.0547	7.9201	9.4089	9.7919	8.8129
MT3	6.6409	1.3383	5.9907	5.4569	0.495	2.0165	1.929	4.704	3.0438	6.388	4.8462	0.8889	0	1.5215	0.9796	7.9499	4.0939	1.7375	0.5726	5.4423	2.0507	5.5717	3.9736	5.9481	4.7251	3.9018	7.8343	2.615	4.7075	0.9313	0	5.338	3.1939	5.0104	4.6766	0.5773	2.6347	0.6575	1.8407	3.656	6.125	0	0.7919	10.1854	6.2867	0.5152	0	2.7251	6.2632
SNCA	3.3193	5.6115	4.0672	2.7089	2.9925	4.8891	3.34	7.3409	3.3303	3.9525	5.7259	5.9618	4.2749	4.2306	3.1335	6.2074	4.0117	3.7662	4.2124	3.065	5.8133	5.0371	1.3226	4.4662	3.5102	4.5222	2.7097	5.4102	7.3043	4.509	4.0271	2.2233	6.3485	7.7418	6.0696	6.1272	3.9897	4.4452	2.7211	4.4134	5.2989	4.6382	4.473	3.2474	7.1246	0.8941	3.0684	6.3141	7.9243
CYP1A1	0	0.5941	0	4.1004	0.8629	3.2055	0.7672	3.3989	0	0	0.5985	0.5119	0.6229	0	0	0.5532	0.5586	0.5528	0	0	0	2.8433	0	0	0.4419	0	0.6922	1.8331	0.5047	0	0.6678	0	0	1.6919	0.5584	0	1.5164	2.987	0	1.7731	0	0	1.3002	0	6.6908	0	0.7159	0.6991	1.0805
MTF1	6.943	8.8408	9.3058	9.1987	8.6053	9.1664	9.1078	8.9146	9.0983	8.9098	9.7604	9.217	8.2475	9.2789	8.5459	8.258	7.7993	8.907	8.3698	7.7549	8.6266	9.6182	7.8269	8.4659	8.1432	8.994	6.8444	8.4217	8.9652	8.8468	8.0025	8.4926	8.1037	9.2207	9.9487	8.5085	8.859	8.8088	8.5816	7.9062	9.1034	8.9788	9.063	7.3951	9.3033	8.8569	8.7616	8.6664	9.0843
ATP7A	7.9526	8.3217	9.1426	9.3317	8.041	9.0418	7.6986	8.1701	8.2393	8.6634	8.3022	8.2246	7.9497	9.1158	7.1039	8.9993	7.7431	8.5381	9.1287	9.1196	7.6626	8.4383	6.9897	9.1608	8.1882	8.2601	8.0936	8.0748	8.7035	8.1218	8.8605	8.7246	9.6194	8.5708	7.8556	8.109	8.2245	6.7829	8.6325	6.9965	9.0982	8.3022	8.9756	8.3964	8.2161	8.6382	8.9902	8.2947	8.2752
ATP7B	8.8038	8.4064	9.2553	10.0645	7.2599	8.7822	9.6219	8.6933	10.3612	9.8399	9.1759	7.7209	10.2095	9.8989	8.9646	8.7164	9.1555	7.9996	9.6	10.6679	11.6953	9.2619	8.6253	9.6857	9.4392	11.0816	8.949	8.5692	9.0846	9.0665	8.8084	9.5438	9.2278	8.1457	8.5913	9.0752	8.5792	8.7826	9.2401	8.8315	9.0504	7.9625	9.924	9.5305	9.1024	8.7503	9.2551	9.1556	8.2726
VEGFA	10.4014	11.64	11.1312	12.102	11.8659	10.9	11.0754	10.4299	12.0497	10.7724	10.6863	11.5752	10.5058	11.8848	11.9195	10.6244	11.5057	12.0655	13.5548	11.2349	12.1966	11.1498	11.8022	12.3844	11.2531	10.9422	12.2416	12.0184	11.0661	11.6075	11.5804	12.1024	12.1486	9.5983	10.4506	10.9019	11.1395	10.5254	12.7787	11.2355	11.7457	11.6539	12.1779	11.4909	10.416	12.1703	11.2936	11.3003	10.1693
MAP2K1	9.8994	10.0375	10.7739	10.5351	10.2689	10.6114	9.8372	10.1717	9.7645	9.3184	9.9414	10.1703	10.1908	10.5461	10.0372	9.9615	10.7203	10.3073	10.3336	10.4984	10.4093	9.8763	9.2113	10.2528	9.6573	10.4025	10.3549	10.6509	10.1554	9.8963	10.1493	10.0514	10.4739	10.1381	10.2658	10.0352	10.4251	10.4876	9.9258	10.0923	10.3967	10.8373	10.0467	9.8467	9.9863	9.7056	10.2544	10.4388	9.9886
ULK2	6.0556	8.4617	7.4915	7.8849	8.2358	8.6341	7.2539	8.649	7.7283	7.7559	8.1486	8.3728	4.8618	7.4081	5.2268	8.4282	8.2096	6.5533	6.9851	6.8509	7.1588	8.0482	7.1385	7.6379	8.1722	8.27	7.9573	7.804	8.6623	8.0692	8.1231	8.4703	8.3488	9.2017	7.6938	8.0593	7.8517	6.8851	7.9058	7.4912	8.13	8.5041	7.7959	7.6322	8.372	5.6541	8.3262	7.9931	8.8604
MT2A	9.3178	7.6636	10.2807	9.5393	9.9416	9.9549	10.2084	10.3305	9.5431	9.1388	12.1288	10.5055	10.5144	11.0821	10.7193	8.3905	11.317	9.2108	6.9571	8.0259	7.4678	12.3807	7.8515	11.066	10.2253	8.3128	8.7343	11.198	10.95	9.653	9.8294	8.1025	7.2652	12.5257	13.6588	10.6918	7.8633	12.0287	8.1613	11.0488	9.8295	10.9878	9.6125	9.4357	12.9879	8.7401	8.2136	10.882	11.514
NFE2L2	11.2563	11.6111	10.7086	11.61	10.8046	10.8649	10.9397	11.475	11.5461	11.2083	11.56	11.2282	10.8696	10.852	11.933	11.4747	10.8877	10.7154	11.6516	11.5986	11.0321	11.6058	10.4462	11.3328	10.8317	10.9827	11.5192	11.5841	11.1518	11.3981	11.1806	11.4348	12.1376	11.2083	11.3936	11.2383	10.7918	10.8565	11.1442	11.068	10.92	10.555	11.1704	11.0036	11.4199	10.985	10.9391	11.5886	11.7038
[truncated: 385 more columns]

## Sheet: 9-表达谱
Gene	TCGA-CA-5256-01	TCGA-AZ-6599-01	TCGA-AA-3655-01	TCGA-A6-6137-01	TCGA-CK-4952-01	TCGA-A6-5657-01	TCGA-AD-6963-01	TCGA-AA-3663-11	TCGA-A6-6138-01	TCGA-A6-A567-01	TCGA-AA-3712-11	TCGA-D5-6928-01	TCGA-AZ-6598-01	TCGA-D5-6931-01	TCGA-G4-6295-01	TCGA-AA-A01X-01	TCGA-AZ-4313-01	TCGA-DM-A0XD-01	TCGA-D5-6535-01	TCGA-AA-3509-01	TCGA-DM-A28E-01	TCGA-A6-5667-11	TCGA-G4-6307-01	TCGA-A6-2682-01	TCGA-CM-5868-01	TCGA-CK-4947-01	TCGA-D5-5540-01	TCGA-A6-4105-01	TCGA-A6-6651-01	TCGA-G4-6625-01	TCGA-CM-5860-01	TCGA-DM-A28G-01	TCGA-A6-5666-01	TCGA-A6-2675-11	TCGA-AA-3516-11	TCGA-AZ-6605-01	TCGA-CA-5797-01	TCGA-D5-6930-01	TCGA-5M-AAT4-01	TCGA-AA-3685-01	TCGA-D5-6924-01	TCGA-CA-6718-01	TCGA-AZ-6603-01	TCGA-CM-5862-01	TCGA-AZ-6598-11	TCGA-AA-A01Z-01	TCGA-DM-A0X9-01	TCGA-A6-A566-01	TCGA-A6-5662-11
COX19	8.5132	8.7691	9.131	8.6178	8.5993	8.7732	9.5144	8.2515	8.983	8.5749	8.6756	9.4055	9.4017	8.3922	8.9781	9.6904	9.0424	9.4699	9.3266	8.68	8.9625	8.5986	9.4789	8.419	9.4303	8.8504	8.7631	8.9564	8.9167	8.7558	8.7251	9.0174	8.4392	8.2561	8.475	8.7557	9.5847	8.3173	9.3269	8.9576	9.4972	9.4986	9.6263	9.5959	8.6149	9.8432	8.7697	8.811	8.2336
COX11	11.0112	10.0271	9.3259	9.8752	9.9295	8.9486	9.5762	9.6597	9.9796	9.3734	9.7458	9.256	10.3244	10.4347	10.1918	9.813	10.7518	9.7428	10.1774	10.255	9.5864	9.5466	10.1411	10.0058	10.3865	9.9469	11.5399	10.7594	10.057	10.0035	10.2029	10.3523	11.3963	9.7293	9.6955	10.0626	10.1577	10.3404	9.8248	10.4934	9.9194	9.7279	9.6772	10.3594	10.3303	10.3037	10.0836	10.1677	9.9562
COX17	9.6273	8.9769	8.8086	8.7871	8.7509	9.0683	9.6271	8.6954	9.2573	9.3729	9.2225	8.624	9.263	8.6755	8.8154	9.1552	10.0875	9.6786	9.6314	9.1931	9.2683	8.9516	9.744	9.2933	9.899	8.659	9.8128	8.8024	9.1783	8.8998	8.9576	8.9066	9.5853	8.6531	9.5982	9.2648	8.9703	9.43	9.9851	10.099	9.4115	8.7003	9.2754	9.3327	8.7815	8.9797	9.0657	9.2458	9.1237
AOC3	6.3073	6.8407	7.1863	7.9429	6.5021	10.8757	6.7128	12.7228	8.7569	9.341	10.148	9.7939	8.3224	9.06	7.4145	9.7203	6.9644	7.876	6.7701	8.0017	5.0781	10.8545	7.0333	9.9836	9.7841	8.9976	6.2267	7.8592	12.3634	9.1062	9.1862	7.7342	7.2794	13.2368	11.1088	10.1458	9.3939	9.3313	7.4815	7.3096	9.7059	9.6189	9.5342	8.4938	12.3089	7.1947	7.42	10.0178	12.7287
CCS	8.516	8.7379	8.5654	8.6329	8.2021	8.6219	8.7954	9.0844	7.8857	9.0174	9.016	8.827	8.8805	8.5622	8.9074	9.5163	8.5742	9.5197	8.0763	8.6694	8.5749	9.2752	9.9291	8.8857	8.9881	7.846	8.2122	8.3073	8.9469	8.8181	8.7326	8.97	8.7599	8.856	9.3366	8.6407	9.3722	9.3326	9.2173	9.0273	8.629	9.1468	8.6463	8.7073	9.3758	8.7387	9.1732	8.8394	9.1093
DLAT	10.5317	9.7525	10.4997	10.279	10.5464	10.1705	10.3247	10.7068	10.1995	10.5985	10.4842	10.1142	10.2928	10.3316	10.6728	10.3619	10.9566	10.0837	10.2776	10.4501	10.4565	10.6712	10.2005	10.3462	10.5104	10.9738	10.7552	10.1763	9.7255	10.1992	10.3113	10.8803	11.1446	10.3224	10.0608	10.1332	10.902	10.163	10.5263	10.4194	9.7859	10.249	10.2777	9.8701	10.5637	11.3879	10.4993	10.4444	10.3915
PDHB	10.9514	9.8897	10.0158	9.9866	10.2724	9.5467	10.3362	10.6339	10.2149	10.7553	10.48	9.7912	9.7911	10.3316	10.5947	10.4216	11.0052	10.0383	9.2594	9.9014	10.2201	10.3935	10.5651	10.5936	11.0955	10.8291	11.3196	9.868	10.0426	10.1807	10.4243	10.9927	10.7425	10.514	10.2779	10.3844	10.3663	10.1142	9.8777	10.8947	9.8295	10.0183	10.2979	9.4343	10.2241	10.6613	10.5589	10.502	10.5682
DLD	11.7388	10.5682	11.4642	11.1136	10.512	11.0448	11.3194	11.7457	11.6095	11.3202	11.3345	10.7193	10.6261	10.8533	10.8856	11.8218	11.841	11.1183	11.3217	11.0479	10.9535	11.5684	10.8223	11.2592	11.0185	11.9742	11.1772	10.795	11.0899	11.2283	11.9924	11.6441	11.4675	11.5032	11.3753	11.1648	11.4674	10.862	11.5438	11.4176	10.9653	10.7577	10.9582	11.3668	11.5292	11.9024	11.5272	11.5358	11.6576
CDKN2A	7.79	4.9331	7.5026	4.7216	5.5872	8.0015	6.2164	3.9375	7.0081	2.3611	4.5303	6.6895	4.598	6.8471	6.5814	7.3459	7.1097	7.178	4.5787	5.5261	2.8652	3.7895	5.8738	6.007	6.0259	6.1271	3.735	7.3977	6.2313	6.0804	8.1652	6.7533	5.2742	4.1929	4.6766	6.6427	6.899	5.7425	5.718	6.2378	4.8136	8.7693	6.3987	7.4608	4.0923	7.3583	4.5927	6.0135	3.7293
[truncated: 385 more columns]

## Sheet: 表达谱筛选肿瘤
sample			PDK1	DAXX	APP	TYR	CD274	MAP1LC3A	HSF1	PRND	ARF1	COX19	COX11	COX17	PDHA1	GLS	LIAS	LIPT1	AOC3	MT1H	MT1X	MT1M	MT1E	MT1F	MT1G	MT1A	SCO1	CCS	DLAT	ABCB6	PDHB	ANKRD9	PRNP	GCSH	SLC31A1	DLD	SLC31A2	CP	CDKN2A	MAP2K2	FDX1	SOD1	ULK1	CCDC22	BACE1	LOXL2	BECN1	SLC25A3	DBH
TCGA-CA-5256-01	01	Tumor	9.3809	10.2649	14.066	0	3.1579	9.5862	11.0705	2.768	13.3342	8.5132	11.0112	9.6273	11.2091	11.0742	8.9727	7.5589	6.3073	3.9812	8.9435	1.3702	7.977	7.9025	10.1482	2.6515	8.7919	8.516	10.5317	9.1201	10.9514	7.9496	10.6436	6.6486	10.98	11.7388	7.6938	4.555	7.79	11.3008	9.4259	12.0944	7.649	9.0106	8.9043	9.6069	10.8062	13.1981	1.3702
TCGA-AZ-6599-01	01	Tumor	7.7952	10.3479	15.5165	0	3.78	8.3124	11.1162	0	13.6679	8.7691	10.0271	8.9769	10.4762	10.242	7.8881	6.6334	6.8407	0.5941	7.0269	1.0136	4.754	4.2736	5.4188	3.2722	9.0355	8.7379	9.7525	9.5452	9.8897	8.0522	6.3666	4.3477	10.3085	10.5682	5.9215	2.7887	4.9331	11.3462	8.5584	11.2965	10.4814	9.2702	9.0715	6.8973	11.0408	12.56	0
TCGA-AA-3655-01	01	Tumor	8.4227	9.8981	14.5334	0	4.9604	7.9412	10.9711	2.6087	13.5121	9.131	9.3259	8.8086	11.5979	10.7606	7.768	6.2322	7.1863	5.7633	8.1951	7.0107	11.1899	7.2136	10.0484	7.1444	8.5882	8.5654	10.4997	8.3503	10.0158	6.7185	10.2721	4.4195	10.6079	11.4642	6.9417	1.919	7.5026	11.5023	8.7631	11.7905	9.0586	10.1978	9.39	10.2833	11.0527	13.0139	2.0858
TCGA-A6-6137-01	01	Tumor	8.9788	10.5093	14.6919	0	4.9755	9.0101	11.5738	4.1387	13.4406	8.6178	9.8752	8.7871	11.7518	10.6302	8.0064	6.1149	7.9429	5.2967	7.845	5.4869	8.3846	7.4008	9.2245	4.1387	8.8791	8.6329	10.279	7.9632	9.9866	9.0178	10.2737	5.2796	10.7599	11.1136	7.8962	3.1435	4.7216	11.5098	9.2908	11.6452	9.5937	9.8151	9.1207	10.1152	11.609	12.8791	2.3656
TCGA-CK-4952-01	01	Tumor	9.7194	10.8148	14.3481	0	4.7654	7.0576	12.1079	2.8359	13.6119	8.5993	9.9295	8.7509	11.1516	10.5185	8.1614	6.2226	6.5021	5.9444	8.9961	1.6072	7.8849	4.7213	9.0439	0.495	9.2176	8.2021	10.5464	9.6881	10.2724	6.158	8.282	3.686	10.9861	10.512	7.2209	6.1804	5.5872	11.2421	9.5525	11.8905	10.2208	9.3391	8.2591	10.1868	10.0439	13.8108	0.8629
TCGA-A6-5657-01	01	Tumor	7.9204	10.5977	14.3688	0.3836	4.3356	8.2454	11.9328	3.2977	13.4097	8.7732	8.9486	9.0683	11.4863	10.8358	7.478	6.1881	10.8757	2.6272	8.3393	5.1589	8.4875	5.6095	6.8522	2.8262	8.5082	8.6219	10.1705	8.4093	9.5467	7.6607	10.7509	5.4777	10.7993	11.0448	6.8823	4.7039	8.0015	12.1372	9.0715	12.1428	10.0182	9.9812	9.6667	11.7462	10.485	13.4111	2.1212
TCGA-AD-6963-01	01	Tumor	8.6927	10.7303	13.8131	0	4.6564	8.8181	11.6645	1.2654	13.6305	9.5144	9.5762	9.6271	12.0687	11.2969	8.0629	6.9715	6.7128	3.2363	8.5296	3.3892	10.1986	6.3774	9.3072	4.6362	9.219	8.7954	10.3247	9.927	10.3362	7.277	10.7586	6.0734	10.7941	11.3194	7.1929	0.7672	6.2164	12.045	8.8158	12.2585	9.2359	10.112	8.2035	9.1958	11.256	13.0552	3.0036
TCGA-AA-3663-11	11	Normol	8.7404	10.3298	14.4628	0	4.0457	8.9146	10.9325	5.0014	13.4915	8.2515	9.6597	8.6954	11.5574	10.5276	7.9614	6.6618	12.7228	7.2017	8.5165	6.5922	10.176	7.6113	10.4098	2.3722	9.7061	9.0844	10.7068	8.477	10.6339	8.2822	11.9981	3.5535	10.0886	11.7457	8.5282	8.8371	3.9375	11.8976	9.6385	11.8511	9.7019	9.3683	9.3289	9.4057	11.0424	13.5038	1.9941
TCGA-A6-6138-01	01	Tumor	8.6857	10.9795	15	0	6.5591	7.9973	11.0164	3.1941	13.3623	8.983	9.9796	9.2573	10.7403	11.2857	6.9082	6.6465	8.7569	2.2089	6.8357	2.467	5.5041	5.3364	4.9491	1.4914	8.2628	7.8857	10.1995	8.6046	10.2149	6.2936	10.0116	3.1941	11.1305	11.6095	8.4218	10.0907	7.0081	11.6576	8.9595	11.8524	9.3015	9.252	8.8505	10.8335	10.8969	12.9751	0.9304
TCGA-A6-A567-01	01	Tumor	9.1467	10.403	14.0597	0	3.6297	9.178	11.2305	3.2134	13.4107	8.5749	9.3734	9.3729	11.5	12.0128	6.8165	6.8813	9.341	3.3659	7.9189	4.506	6.4232	6.0704	6.9673	3.0428	8.4874	9.0174	10.5985	8.8905	10.7553	5.9787	11.1115	4.2942	10.0058	11.3202	6.7488	3.0643	2.3611	10.8003	9.3548	11.1402	9.4896	9.4323	9.0515	9.7629	10.9796	13.021	0
TCGA-AA-3712-11	11	Normol	9.6722	10.2502	14.2561	0	4.3602	8.3301	10.5196	1.0203	13.523	8.6756	9.7458	9.2225	11.3988	10.3756	8.1616	6.4576	10.148	8.8651	10.9676	10.2319	12.2633	10.1323	12.3907	5.885	9.5088	9.016	10.4842	7.5374	10.48	8.8667	10.2999	2.2013	10.4596	11.3345	9.1156	8.6873	4.5303	11.7934	9.3313	11.5458	9.7179	9.0578	8.9105	8.1537	11.213	13.3824	2.4924
TCGA-D5-6928-01	01	Tumor	9.2345	10.6259	14.0483	0	8.797	7.9013	10.4236	4.4224	13.0223	9.4055	9.256	8.624	10.615	11.0581	7.9116	6.9991	9.7939	4.7308	8.1997	3.7842	8.1335	6.1466	7.9318	0	9.1591	8.827	10.1142	8.6035	9.7912	7.3882	10.8631	2.3948	10.7323	10.7193	9.3283	9.1727	6.6895	11.0124	8.0663	11.5185	10.1987	9.1478	9.192	10.4982	10.4872	12.8976	5.8703
TCGA-AZ-6598-01	01	Tumor	8.8504	10.7075	14.3249	0	4.3146	7.0931	10.9991	1.3895	13.6672	9.4017	10.3244	9.263	10.7112	10.3904	7.0467	6.075	8.3224	4.0107	9.0146	3.9106	8.4769	6.2693	7.99	0.6229	9.2439	8.8805	10.2928	8.1809	9.7911	6.4494	11.0364	3.4221	10.4821	10.6261	8.0293	8.9364	4.598	10.8388	8.8639	12.9002	9.5885	8.8854	7.6534	10.2458	11.0957	13.1007	1.0565
TCGA-D5-6931-01	01	Tumor	10.2297	10.2999	14.1405	0	5.3817	7.5907	10.8046	1.7392	13.4617	8.3922	10.4347	8.6755	10.7768	10.2207	7.6986	5.9381	9.06	8.3919	9.9338	8.8755	10.5602	8.9332	11.3355	4.5801	9.5567	8.5622	10.3316	8.1808	10.3316	7.109	10.7602	5.1917	10.6901	10.8533	7.2172	5.6681	6.8471	11.4463	8.6165	11.5793	9.8883	9.2759	8.7619	11.1265	10.6297	13.6461	1.9284
TCGA-G4-6295-01	01	Tumor	9.6911	10.7997	13.8441	0	5.1499	9.2363	12.1198	1.7781	13.0278	8.9781	10.1918	8.8154	10.7088	12.5828	7.2721	6.8841	7.4145	4.891	9.5552	5.4834	10.166	7.4905	9.2922	1.7781	8.1139	8.9074	10.6728	8.9815	10.5947	7.467	10.341	6.4751	11.1308	10.8856	7.4227	4.0348	6.5814	10.7651	9.2525	11.0344	9.5174	8.4589	8.0279	8.4864	10.5676	13.3791	2.4259
TCGA-AA-A01X-01	01	Tumor	9.6253	9.7729	14.9297	0.952	3.0017	8.9794	10.9354	3.0835	14.2107	9.6904	9.813	9.1552	11.5885	11.3608	7.4421	7.521	9.7203	3.7169	7.7732	3.9529	6.755	6.4504	7.4954	5.3477	9.4202	9.5163	10.3619	8.3302	10.4216	6.2346	11.0477	5.6186	10.5084	11.8218	5.737	4.3749	7.3459	11.1512	8.7465	11.579	10.2655	9.7962	9.3661	9.8552	11.1217	13.1918	3.5543
TCGA-AZ-4313-01	01	Tumor	8.9237	10.6272	14.0884	0	3.8318	8.4894	10.9524	2.9297	14.1453	9.0424	10.7518	10.0875	11.0194	10.5137	8.3395	6.2691	6.9644	6.0291	9.5534	5.3969	10.5304	6.3632	9.5415	5.1883	9.2836	8.5742	10.9566	10.0811	11.0052	7.2905	9.6934	5.954	11.4542	11.841	8.6677	2.9607	7.1097	11.7313	9.8736	12.7077	9.1118	9.14	7.8912	9.5534	10.5747	13.5051	0
TCGA-DM-A0XD-01	01	Tumor	8.8887	10.6406	13.7869	0	3.0824	9.135	10.7666	3.2333	13.6531	9.4699	9.7428	9.6786	12.4172	10.991	8.7749	6.3862	7.876	4.3653	9.7916	2.9139	10.4234	7.3653	10.1861	6.26	8.8672	9.5197	10.0837	8.7269	10.0383	6.517	10.3139	5.2076	10.4066	11.1183	6.5533	2.9095	7.178	11.5235	9.2177	12.6808	9.9048	10.1387	7.9996	10.4806	11.0655	13.7309	0.5528
TCGA-D5-6535-01	01	Tumor	9.0299	10.8432	14.6157	0	5.8335	7.8904	10.9619	0.5726	13.6912	9.3266	10.1774	9.6314	11.4916	10.8965	7.1023	6.4433	6.7701	1.2995	5.9964	0.9813	4.5186	3.9191	3.2882	0	8.7074	8.0763	10.2776	7.8473	9.2594	7.5095	10.3106	4.0939	10.8247	11.3217	7.0071	3.8947	4.5787	11.3703	8.7891	11.7975	9.7098	9.4965	8.6438	10.0807	11.1452	12.8797	2.9672
TCGA-AA-3509-01	01	Tumor	8.7944	10.3093	14.1442	2.2931	4.557	8.0331	11.0689	2.2931	14.2763	8.68	10.255	9.1931	11.7699	10.7696	7.942	6.3887	8.0017	2.4154	6.411	2.2931	5.9468	4.4751	5.5662	2.7301	8.6352	8.6694	10.4501	8.6496	9.9014	7.1919	9.6208	5.8086	10.7574	11.0479	6.8724	5.5407	5.5261	11.3271	9.3373	11.8787	9.1129	9.9916	9.9073	10.111	10.8883	13.1447	1.6633
TCGA-DM-A28E-01	01	Tumor	8.2505	10.4486	14.5987	0	2.9515	10.3592	11.2105	0.9246	13.5071	8.9625	9.5864	9.2683	11.5138	11.6181	8.242	6.6277	5.0781	0	5.7425	0.9246	3.3191	4.245	2.6755	1.2309	7.8371	8.5749	10.4565	9.4038	10.2201	7.7968	9.5542	4.8044	11.0705	10.9535	5.403	0.5351	2.8652	11.8472	9.2777	11.7333	9.4385	9.1035	6.7043	7.9409	11.1339	13.3834	0.5351
TCGA-A6-5667-11	11	Normol	8.7371	10.4238	14.6808	0	4.1399	8.9194	10.6187	2.6384	13.6253	8.5986	9.5466	8.9516	11.6335	10.3432	8.089	6.2195	10.8545	9.0964	11.3095	10.7155	11.9033	10.3771	12.6502	6.0973	9.4062	9.2752	10.6712	7.9613	10.3935	8.8587	10.1636	2.6384	10.5689	11.5684	8.4811	7.864	3.7895	11.8992	9.2359	11.637	9.8378	9.1893	8.9293	8.4001	11.3032	13.4076	2.9358
TCGA-G4-6307-01	01	Tumor	7.93	10.6148	14.9233	0	2.0008	9.6539	12.6851	2.2024	13.6864	9.4789	10.1411	9.744	12.6379	9.4442	8.5347	6.8864	7.0333	2.4603	7.3337	0.6784	6.9517	5.407	6.4848	0.9265	8.8549	9.9291	10.2005	8.8069	10.5651	9.0924	10.349	6.2771	9.8729	10.8223	7.0725	1.9034	5.8738	11.6485	9.2207	12.6906	9.8844	9.5663	10.0804	8.9568	10.9992	12.9282	0.9265
TCGA-A6-2682-01	01	Tumor	10.004	10.8154	13.9366	0	4.4995	9.0889	11.2042	4.6841	13.6909	8.419	10.0058	9.2933	11.3445	11.0468	7.9121	6.9296	9.9836	4.9948	8.4909	5.4159	8.3524	6.6264	8.6838	5.8867	9.4114	8.8857	10.3462	8.4422	10.5936	7.3178	10.8541	5.3628	11.0559	11.2592	7.9274	2.8922	6.007	11.2559	8.8248	11.789	9.6657	9.8128	9.5486	11.2322	10.8289	13.2487	1.613
TCGA-CM-5868-01	01	Tumor	8.5734	10.8725	14.8375	0	2.9653	9.4555	11.2431	4.6027	13.4527	9.4303	10.3865	9.899	11.8339	10.6467	8.2405	6.7274	9.7841	3.3162	8.7167	5.9358	9.434	7.4439	8.8793	6.5354	8.8847	8.9881	10.5104	8.0416	11.0955	6.7855	10.7024	5.9188	10.7494	11.0185	7.8547	2.6897	6.0259	11.2852	9.3845	12.9399	9.1973	9.453	9.5523	10.3725	11.5224	12.9108	0
TCGA-CK-4947-01	01	Tumor	9.4062	10.4633	14.4357	0	4.0193	7.5036	10.3448	3.3039	13.2717	8.8504	9.9469	8.659	11.0821	11.0462	8.2421	6.439	8.9976	2.8757	7.5661	2.6021	8.8834	6.2035	8.3357	5.8699	9.8858	7.846	10.9738	7.612	10.8291	6.624	9.5019	3.6819	10.7717	11.9742	7.7865	3.7762	6.1271	11.1281	9.5891	11.7467	8.7354	8.9153	9.3466	10.0819	11.2659	13.2036	2.498
TCGA-D5-5540-01	01	Tumor	9.9	10.7679	14.4995	0	3.9799	8.9472	10.1961	0.6922	13.4602	8.7631	11.5399	9.8128	10.5374	12.2787	8.2795	7.9097	6.2267	3.2661	8.0607	2.4088	7.0595	5.1238	6.3732	2.0281	8.585	8.2122	10.7552	7.7397	11.3196	5.5973	9.9988	6.2734	11.4128	11.1772	6.8674	5.061	3.735	11.3785	9.8197	12.7503	8.4844	8.5983	8.5873	9.4228	10.2201	13.8633	0.6922
TCGA-A6-4105-01	01	Tumor	9.2719	10.5939	13.8071	0	6.0241	9.5731	10.7354	1.0181	13.7689	8.9564	10.7594	8.8024	11.8107	11.6172	7.2789	6.7417	7.8592	6.1647	8.9886	5.543	8.9769	6.9365	9.2957	4.9417	8.8481	8.3073	10.1763	7.7613	9.868	7.0801	10.1174	5.8933	11.2362	10.795	8.3374	4.9651	7.3977	11.709	9.1431	11.6377	9.9652	9.8692	9.3565	11.2294	10.6825	13.2478	3.618
TCGA-A6-6651-01	01	Tumor	8.345	10.6708	14.6476	0	5.35	9.0302	11.0128	5.7374	13.4307	8.9167	10.057	9.1783	11.2048	10.827	7.2772	6.1141	12.3634	5.3201	9.0924	5.6439	7.8088	7.2616	8.9868	4.861	9.088	8.9469	9.7255	9.1331	10.0426	7.0545	11.7178	5.1771	10.0855	11.0899	8.5779	6.0285	6.2313	11.3867	8.7136	11.4846	10.2228	9.8114	10.2764	11.2199	10.6837	13.0779	2.2537
TCGA-G4-6625-01	01	Tumor	8.8311	10.9487	14.1201	0.5395	6.4154	9.4528	10.5775	3.8229	13.3151	8.7558	10.0035	8.8998	11.5759	11.3141	6.6614	6.3447	9.1062	3.625	7.1685	4.5653	7.8198	5.6168	7.2308	0.5395	8.9148	8.8181	10.1992	9.1141	10.1807	7.7757	10.0192	5.2204	11.2193	11.2283	8.4853	6.1652	6.0804	11.4341	9.1541	11.6091	9.8388	9.7172	9.3493	9.745	10.8699	12.7602	2.2104
TCGA-CM-5860-01	01	Tumor	7.7733	10.6387	14.0794	0	4.5463	8.0986	10.8762	4.9821	13.3383	8.7251	10.2029	8.9576	11.3725	11.6662	8.2541	6.4122	9.1862	4.5463	8.5061	3.8021	8.2898	6.4418	7.9382	2.7836	9.4614	8.7326	10.3113	7.973	10.4243	6.3511	10.6982	2.7836	10.7988	11.9924	8.1322	4.0224	8.1652	11.8712	9.7992	11.2929	9.1068	9.689	9.4371	11.0889	10.747	13.5659	1.1225
TCGA-DM-A28G-01	01	Tumor	8.8155	10.1414	15.2251	0.5447	2.2233	8.5625	11.2981	0.9392	13.2509	9.0174	10.3523	8.9066	12.1074	10.6903	8.6292	7.1464	7.7342	4.0528	8.0028	1.5033	7.5974	5.7727	8.1844	4.308	9.7744	8.97	10.8803	8.344	10.9927	8.5017	8.3838	4.5532	10.5679	11.6441	6.424	2.3179	6.7533	11.1971	9.5061	11.8663	9.5615	8.8748	8.3375	8.9243	11.1664	13.5322	4.3733
TCGA-A6-5666-01	01	Tumor	9.7675	10.5729	15.0734	0	2.9303	8.7169	10.9426	3.2721	13.5202	8.4392	11.3963	9.5853	12.3541	11.9866	8.9217	6.6692	7.2794	2.7233	6.5965	2.1909	6.9515	5.3482	7.0711	1.603	8.6797	8.7599	11.1446	8.4559	10.7425	6.4778	9.9331	5.581	10.6109	11.4675	6.6487	1.0707	5.2742	11.0873	9.2351	12.4905	8.5406	9.981	7.8115	8.5795	11.9234	13.154	1.3382
TCGA-A6-2675-11	11	Normol	8.3763	10.2977	14.4796	0	3.3109	8.661	10.7483	7.244	13.3361	8.2561	9.7293	8.6531	11.156	10.8184	7.583	6.6204	13.2368	10.6087	10.867	11.1139	12.0009	10.6534	13.1007	6.9315	9.2408	8.856	10.3224	7.7932	10.514	7.6121	12.607	2.8349	10.3293	11.5032	7.4605	8.9954	4.1929	11.3621	9.2207	11.5867	9.9056	9.0951	9.6966	9.486	11.1091	13.359	2.5896
TCGA-AA-3516-11	11	Normol	9.4734	10.3995	14.2235	0	5.1688	8.7438	10.5552	3.0978	13.8669	8.475	9.6955	9.5982	11.1931	10.401	7.8138	6.0983	11.1088	11.3771	11.68	11.9967	13.0484	11.5181	13.6643	5.33	9.6183	9.3366	10.0608	7.79	10.2779	8.7342	10.9201	2.3932	11.2355	11.3753	9.2675	6.0915	4.6766	12.3415	10.0115	12.2725	9.456	8.8595	8.6089	8.6036	11.5236	13.6344	1.5313
TCGA-AZ-6605-01	01	Tumor	8.7797	10.4629	14.6183	0.5773	4.5928	8.89	10.9869	4.9778	13.3297	8.7557	10.0626	9.2648	11.2401	11.1259	7.8781	6.5454	10.1458	4.5017	8.4201	5.7589	9.1805	7.1522	8.3215	1.791	8.832	8.6407	10.1332	7.879	10.3844	6.6427	10.7768	5.6069	10.2392	11.1648	7.872	4.7606	6.6427	11.371	9.3908	11.8956	9.8923	9.4421	10.1908	11.5533	11.2402	12.9669	1.3082
TCGA-CA-5797-01	01	Tumor	8.0752	10.5911	14.2727	0	3.6903	7.9613	11.3075	4.4242	13.6113	9.5847	10.1577	8.9703	12.1532	10.7904	7.1765	6.2077	9.3939	2.4505	7.0485	1.85	5.338	5.4405	6.4608	0.4565	9.3819	9.3722	10.902	8.9478	10.3663	6.9477	11.5426	4.7968	10.245	11.4674	7.2453	1.85	6.899	10.699	9.3883	12.0122	9.6079	9.5349	10.5767	10.643	10.751	13.2838	0.4565
TCGA-D5-6930-01	01	Tumor	8.3868	10.7862	14.8835	0	5.3313	8.2996	10.886	4.7227	13.7727	8.3173	10.3404	9.43	10.782	10.0066	7.8468	6.1586	9.3313	7.7182	10.063	8.7048	12.1878	8.7008	11.4527	6.8054	9.6156	9.3326	10.163	9.0692	10.1142	7.1718	10.399	4.9005	10.7758	10.862	7.2722	6.2637	5.7425	11.694	8.652	12.7194	9.1305	9.7222	9.1613	11.0155	10.9463	13.3014	1.45
TCGA-5M-AAT4-01	01	Tumor	9.1402	10.6631	14.2668	0	3.1285	8.6983	11.4509	1.656	13.4369	9.3269	9.8248	9.9851	12.5359	11.0391	8.2658	6.7091	7.4815	3.7979	7.3956	2.4068	6.8831	5.8094	8.5751	5.2317	9.4067	9.2173	10.5263	8.6697	9.8777	8.8432	10.9987	5.5559	10.6665	11.5438	7.1685	1.8647	5.718	11.8313	9.3325	12.2865	9.574	10.1508	9.3592	9.1877	10.684	13.3979	1.4442
TCGA-AA-3685-01	01	Tumor	9.9426	10.3723	13.586	0.5691	5.5074	8.3761	11.3679	1.2932	13.8024	8.9576	10.4934	10.099	11.5995	11.4336	8.4774	7.7583	7.3096	6.4199	9.2081	6.0817	9.5302	7.585	10.0306	5.3452	9.2738	9.0273	10.4194	9.6598	10.8947	7.9321	10.7847	5.8474	10.5508	11.4176	8.2783	4.5708	6.2378	12.4251	9.9797	12.0931	8.5867	10.0196	8.6172	9.6763	10.2151	13.6339	0.5691
TCGA-D5-6924-01	01	Tumor	8.9536	10.4843	14.7497	0.7325	5.7169	8.9066	11.1636	3.049	13.2563	9.4972	9.9194	9.4115	12.0683	11.1513	7.1687	6.8592	9.7059	5.8218	8.2819	5.8386	10.0846	8.3768	10.4451	6.5072	8.5825	8.629	9.7859	8.516	9.8295	7.5862	10.55	3.69	10.4574	10.9653	7.8488	2.8423	4.8136	11.1784	8.5005	11.6094	9.9531	10.2642	9.6272	11.4176	11.3726	12.8274	2.1068
TCGA-CA-6718-01	01	Tumor	7.5418	10.6605	14.2195	0	8.2078	6.4003	11.0316	3.4839	13.334	9.4986	9.7279	8.7003	11.0614	10.3693	8.625	7.0583	9.6189	3.5816	8.7576	2.0478	8.7419	5.3838	5.6658	0.477	9.6044	9.1468	10.249	10.0459	10.0183	6.7066	10.8485	5.4756	11.3973	10.7577	8.3823	2.9912	8.7693	11.1603	8.7537	11.8326	9.215	9.334	8.8621	10.9673	10.4757	12.6794	6.1286
TCGA-AZ-6603-01	01	Tumor	7.7353	10.5541	14.5704	0	5.6226	9.5207	11.2042	1.0683	13.047	9.6263	9.6772	9.2754	12.0916	10.9943	7.3679	6.7803	9.5342	5.0836	8.1274	5.4402	8.6103	7.4756	9.0933	2.1013	8.7528	8.6463	10.2777	8.2519	10.2979	7.4547	11.2477	5.5343	10.4625	10.9582	7.7983	4.502	6.3987	11.2822	9.068	11.7053	9.7339	10.2071	10.0022	10.631	11.3118	12.6997	1.3002
TCGA-CM-5862-01	01	Tumor	8.7713	10.4495	14.0782	0	2.0936	8.0643	12.3244	2.0936	13.7564	9.5959	10.3594	9.3327	10.8559	12.1346	9.9213	7.9563	8.4938	3.7461	8.1597	2.9138	6.2386	6.108	7.3437	3.0338	8.5801	8.7073	9.8701	9.5547	9.4343	6.5314	8.9966	4.1694	10.9627	11.3668	6.9374	1.3163	7.4608	11.9718	10.0951	12.0468	8.9208	9.53	8.6915	10.046	10.7195	13.0659	0.7256
TCGA-AZ-6598-11	11	Normol	8.236	10.3703	14.2743	0	4.1306	9.1393	10.8097	3.1373	13.5021	8.6149	10.3303	8.7815	11.7079	10.1239	8.18	5.9862	12.3089	9.5044	11.1788	10.8635	12.6599	10.5448	12.8682	5.4635	9.6367	9.3758	10.5637	8.5748	10.2241	8.3458	11.3727	2.5961	10.3777	11.5292	8.7979	9.2616	4.0923	11.9238	9.4219	12.0923	9.825	9.1999	9.5342	9.0371	11.1323	13.2069	2.4822
TCGA-AA-A01Z-01	01	Tumor	8.5616	10.6975	14.0925	0	2.5163	8.0888	11.6538	1.6535	13.5782	9.8432	10.3037	8.9797	12.785	11.0104	8.1401	6.4528	7.1947	2.8091	8.2316	4.0019	7.6262	5.7493	8.0425	2.2818	9.0029	8.7387	11.3879	8.5596	10.6613	7.7406	9.8851	5.2115	10.9078	11.9024	6.3894	0.9528	7.3583	11.735	9.3752	12.9519	9.4048	10.1635	8.9158	9.2678	10.8936	13.3912	0.5152
TCGA-DM-A0X9-01	01	Tumor	8.9673	10.3426	14.4955	0	3.8248	9.0509	10.7801	1.3819	13.8592	8.7697	10.0836	9.0657	12.7935	10.9252	8.1757	6.9006	7.42	3.7232	7.8498	1.1921	6.629	5.3403	7.8193	3.6139	9.9961	9.1732	10.4993	9.0302	10.5589	7.3278	11.3246	5.6574	10.0333	11.5272	6.1438	0.4018	4.5927	11.1565	9.6379	12.2936	9.6661	10.0468	7.8007	9.5516	10.8916	13.7217	2.1807
TCGA-A6-A566-01	01	Tumor	9.6768	10.3763	14.2673	0	5.2399	8.7335	10.3003	7.7006	13.3899	8.811	10.1677	9.2458	10.8142	11.008	7.6832	6.3976	10.0178	4.9797	7.9318	4.2542	9.9255	7.8248	9.3514	7.3608	9.2736	8.8394	10.4444	8.4665	10.502	6.5045	10.4372	4.3455	10.7956	11.5358	8.8531	4.909	6.0135	11.004	9.1221	11.9982	9.7307	8.7881	10.292	12.5862	10.8059	13.4272	2.7251
TCGA-A6-5662-11	11	Normol	8.5249	10.3045	14.4975	0	4.0538	8.7876	10.6028	5.0587	13.3442	8.2336	9.9562	9.1237	11.3273	10.5453	8.1421	6.5941	12.7287	8.4487	10.469	9.9998	11.5809	9.5229	11.7497	6.0732	9.3365	9.1093	10.3915	7.9323	10.5682	7.1098	12.7054	2.7168	10.1956	11.6576	8.4783	8.335	3.7293	11.5754	9.6006	12.1526	9.5196	8.8926	9.1295	9.1747	11.2763	13.4443	2.9428
TCGA-D5-6534-01	01	Tumor	7.9528	10.5544	14.8634	0.4314	6.9008	8.1864	11.1122	4.9201	13.3435	8.8531	8.5653	9.0076	10.4529	10.9469	7.1227	6.2328	11.0295	5.9459	8.4333	5.9212	8.634	7.283	8.634	2.4675	8.4216	8.9221	10.1366	7.4873	10.0242	6.9786	10.8611	3.3799	10.4177	11.0855	9.3755	6.9589	8.9324	11.3448	9.1499	11.5184	10.7557	9.2047	10.2635	11.0497	10.682	12.9627	3.2272
TCGA-CK-6746-01	01	Tumor	8.8722	10.5076	14.3782	0	6.7937	4.3004	11.6731	0.9354	13.5304	8.6683	9.6359	9.0075	11.3226	11.3999	8.5546	6.7514	7.3443	5.0214	8.2944	6.5902	10.4448	6.304	9.9447	5.8586	9.5412	8.0654	11.2214	8.5873	10.4802	7.5654	10.893	5.5569	10.4853	11.2735	8.3917	7.0984	2.5893	11.4006	8.4208	12.6509	9.2255	9.3688	9.2145	8.7009	10.1324	13.2346	0
TCGA-A6-5656-01	01	Tumor	8.3399	10.3372	14.6077	0	2.8246	9.3302	11.9446	1.9128	13.4689	9.8583	9.919	9.3897	12.0646	11.6944	7.962	7.232	8.4783	1.9128	6.8516	2.5796	6.1879	6.6519	6.8516	2.933	8.0489	8.4626	10.1115	9.4975	10.3204	6.7663	11.6595	5.0479	10.2143	11.1617	7.3638	2.2811	5.8434	11.4003	9.5356	12.2098	10.2786	10.0471	8.2536	8.8663	11.2834	13.1208	1.6837
TCGA-5M-AAT6-01	01	Tumor	9.1696	10.5379	14.2146	0	6.7719	8.3127	12.0194	5.2384	13.4348	8.3158	9.292	9.2788	11.3053	11.532	7.5548	6.4315	9.2635	6	9.843	9.8201	12.423	6.6068	9.2711	7.7121	9.7927	9.2464	9.6349	8.5609	10.1078	6.6733	10.95	5.6689	10.634	11.2979	8.5178	8.8478	6.5167	11.1828	9.153	13.1704	9.4671	9.3856	9.708	9.5438	10.7943	13.1573	2.9188
TCGA-QG-A5Z1-01	01	Tumor	8.5463	11.1792	15.1691	0.7424	2.3329	8.8612	11.26	3.0709	13.3321	9.5406	9.6612	8.5515	11.3756	10.9518	7.9245	5.9262	10.4521	0.7424	6.5107	3.0119	7.8252	5.7594	5.7322	0.4185	8.2312	8.7175	10.1238	8.4955	10.208	8.5489	9.4974	3.5568	10.5231	11.4179	7.3711	2.0968	6.8337	10.8796	8.8602	11.773	10.2628	8.8181	9.8129	10.3854	11.729	12.2448	0.4185
TCGA-AZ-6605-11	11	Normol	7.8634	10.1803	14.2721	0	4.0443	9.2522	11.0021	5.1586	13.1935	8.0844	9.9095	8.866	10.983	10.237	8.0936	6.8464	15.2394	3.8093	8.6931	6.3059	9.8027	4.9999	6.807	2.0356	8.7294	9.5848	10.1656	8.5139	10.9557	6.791	13.6138	4.6892	9.2256	11.5462	7.3689	8.177	4.0975	11.2636	8.6866	11.7081	10.6527	9.0169	10.429	10.7857	10.8123	13.4156	2.2387
TCGA-CK-4951-01	01	Tumor	8.3738	10.6559	14.1326	0	6.2553	7.7101	10.6498	1.4741	13.5357	8.4672	10.3741	8.7959	11.4141	10.2868	7.9489	7.0182	8.8591	5.6964	8.4623	8.0684	9.7129	7.8095	8.8051	5.029	10.0343	8.9501	10.4126	8.9826	10.1304	5.8818	10.5414	5.745	10.8053	10.5572	8.6062	3.2899	3.8593	11.294	8.8767	11.9451	8.6943	9.7979	9.3172	11.3072	11.1439	13.0327	1.4741
TCGA-CM-6680-01	01	Tumor	9.0606	10.6244	14.8493	0	5.5931	8.2917	10.7537	3.8049	13.5751	8.6446	10.0432	8.7503	10.8168	10.6735	7.7396	6.8914	9.2776	4.7019	7.8128	4.7019	7.8158	6.2317	7.7613	4.5953	9.3654	8.7855	10.0878	9.0412	10.1343	7.7978	9.6522	4.8249	10.3899	11.0098	7.6919	6.3594	5.9902	11.1259	8.5274	11.5194	9.9721	9.3875	9.6185	10.6771	11.2751	12.5991	5.2855
TCGA-CK-5913-01	01	Tumor	9.7462	10.4708	14.8872	0	5.9444	7.079	10.5796	2.3805	13.556	8.6194	9.904	9.111	10.7788	10.8394	8.1632	6.5143	8.1904	4.3766	8.3663	4.6182	11.4924	6.3757	9.5593	4.0501	9.6277	8.3533	10.6665	8.507	9.9877	6.7303	10.7524	4.6427	11.0401	11.3333	8.0982	4.0756	5.3112	10.9482	9.3324	13.5462	9.1296	8.4878	8.8998	10.4423	10.6946	13.2766	0.5066
TCGA-CM-6172-01	01	Tumor	8.1419	10.4602	14.5016	0	2.7106	9.3542	9.8564	2.2318	13.5204	9.14	10.2731	8.9952	11.5505	10.5154	8.613	6.6223	8.2488	1.9157	7.0672	3.4812	7.168	5.2643	7.3588	4.5635	8.946	7.9148	10.196	8.6795	10.3744	7.168	10.3809	2.809	10.7798	11.7565	7.5018	3.7145	3.8938	11.2748	8.7164	11.7493	9.3895	9.3028	9.2041	10.3033	11.3816	12.8932	2.491
TCGA-G4-6309-01	01	Tumor	8.3957	10.9065	14.0845	0	3.247	8.4126	10.7963	1.4323	13.623	8.5404	10.3111	9.4955	11.4527	10.3907	8.2396	6.5612	6.9982	6.7627	9.9689	5.1514	10.3549	6.2323	9.7839	8.0053	9.8205	8.9768	10.47	9.6996	10.8327	7.5183	10.3717	6.0094	11.2526	11.3886	6.8361	2.2595	4.34	11.3412	9.2969	12.6052	8.7221	9.0888	7.4499	9.75	10.8797	13.6689	1.4323
TCGA-F4-6461-01	01	Tumor	9.4755	10.2486	15.7425	0	4.3575	8.2026	11.1019	5.8255	13.5551	8.9049	10.5518	9.0701	10.408	10.6844	7.7289	6.5637	10.0575	3.6667	8.7255	4.7348	7.4543	6.4209	7.7251	0.6389	8.6909	8.8971	9.2953	6.8555	10.1446	6.8961	11.0763	2.9421	10.2942	10.6868	6.6138	5.6191	4.7647	11.6281	8.2588	11.355	10.4227	9.049	9.2577	10.4127	10.8495	12.8251	2.1186
TCGA-G4-6299-01	01	Tumor	9.2094	10.1453	13.9509	0.541	3.6292	8.5008	11.2092	3.5191	13.4183	9.3309	10.243	8.634	10.4666	11.0168	7.9859	6.1785	8.966	4.7017	8.9436	5.6478	9.0201	7.0397	9.01	2.8815	9.5443	8.6811	10.0219	9.7443	9.9206	7.1866	10.4199	5.2766	10.1366	10.6062	8.0591	7.5279	9.7836	11.7058	9.0023	11.4696	10.298	8.9177	9.7851	9.43	10.5481	12.2566	1.8991
TCGA-CM-6168-01	01	Tumor	9.4017	10.5134	14.7884	0	5.5129	7.9062	10.8634	4.2568	13.2686	8.6657	9.8883	8.6392	11.0385	11.5596	7.8858	6.2273	10.6705	4.015	8.0346	5.2021	9.369	6.0872	8.9433	4.1236	9.6862	8.2173	10.6615	7.9766	10.2639	6.6501	10.8859	5.0816	11.0219	11.8456	8.3536	6.6276	5.8123	11.0968	9.3486	11.822	9.3735	8.7503	10.1857	11.1685	10.9175	13.1257	1.8188
TCGA-AD-A5EK-01	01	Tumor	7.8558	10.3001	14.1636	0.4679	3.1773	9.2693	11.1913	3.1773	12.8223	9.7459	10.482	8.0684	11.4728	11.669	8.8371	7.3043	7.7365	4.1585	8.2095	4.2773	9.2404	6.3749	8.6516	4.489	8.103	9.0523	9.7514	9.084	9.8355	7.1142	9.3503	5.0016	10.7477	11.3457	6.9496	2.1828	8.8951	11.9115	8.5432	12.1222	9.8511	10.1414	9.1586	9.6498	11.3497	12.7208	2.4848
TCGA-AM-5820-01	01	Tumor	7.8364	10.612	14.4247	0.8759	3.1592	7.2414	10.745	0.8759	13.3367	9.6325	9.7679	9.4784	11.3442	11.7892	8.9824	6.708	10.5358	2.1178	5.9038	2.1178	5.7331	3.4622	3.8854	1.8095	9.2815	8.9812	10.638	9.5297	9.8171	7.639	11.255	5.3158	10.1764	12.0786	6.1184	2.0496	6.6066	11.0885	9.4074	12.1137	8.9216	9.0453	8.8306	10.4019	11.0089	13.5836	0
TCGA-A6-2682-11	11	Normol	9.5435	10.4855	14.3436	0	4.2305	8.9735	10.6668	0.8542	13.6663	8.5202	9.7577	9.1835	11.6213	10.6472	7.9993	6.5253	9.6225	10.41	11.3607	11.0586	12.4601	10.9672	13.2523	6.4896	9.6306	9.2558	10.4194	7.937	10.5382	9.0247	9.9842	3.7134	10.5875	11.6102	8.8862	7.6348	4.5117	12.1152	9.846	12.0105	9.8711	9.3551	8.6701	8.9998	11.244	13.475	1.5944
TCGA-A6-6648-01	01	Tumor	9.41	10.7503	14.4474	0	4.6226	7.7801	10.8052	2.9274	12.9623	9.2103	11.0489	7.6728	11.5665	11.0474	7.2571	6.1108	7.8277	5.0563	7.662	5.8874	8.0023	6.8658	9.0714	3.1083	9.4325	8.2703	11.0234	7.7756	10.3208	7.8179	9.7676	4.8041	10.9042	11.8371	7.1808	4.4815	4.5618	11.1393	9.5044	11.7478	8.6364	8.8191	9.9461	9.6109	11.2713	13.1374	0.8175
TCGA-CA-6717-01	01	Tumor	9.8248	10.8446	14.9173	0	5.3601	8.327	10.5908	4.499	13.4983	8.7422	10.6282	8.4712	10.799	10.9701	8.1324	6.5185	11.1498	5.9906	9.2889	4.9196	10.622	7.7137	9.991	2.8686	9.7611	8.7241	10.7097	9.0733	10.4773	6.9107	11.2014	5.659	10.8258	11.4322	8.2024	5.7695	5.4371	11.0858	9.2306	12.2409	9.6442	8.8317	9.3187	10.475	11.2932	13.0314	1.701
TCGA-AU-6004-01	01	Tumor	9.6103	10.3767	14.5178	0	5.5249	8.281	11.0231	2.3033	13.5986	8.5007	9.9375	8.6448	11.1212	10.6057	7.9898	6.5702	9.1886	5.1693	9.025	5.5918	10.5882	6.0855	8.3866	0.9066	9.6788	8.9169	10.5684	8.9806	10.3211	7.056	10.7148	3.2186	10.961	11.3673	8.2103	6.024	4.6468	11.0147	9.2058	12.9717	9.4004	9.1344	9.5793	10.8298	10.8902	13.3954	3.7273
TCGA-A6-2684-01	01	Tumor	9.1406	10.5783	13.6155	0	5.5083	8.3073	10.7041	4.8257	13.5731	9.0874	9.4084	8.1084	12.1546	11.4683	7.011	7.057	10.4001	5.6348	8.4614	3.9425	7.2885	6.2677	9.3187	4.6503	8.7276	8.8901	10.7155	9.2007	10.4531	7.3797	10.9001	3.4856	10.2858	11.0064	7.9113	5.9826	7.0819	11.3553	9.1815	10.7123	10.1333	10.2172	9.6387	10.9651	10.2289	13.5177	2.8131
TCGA-AZ-6599-11	11	Normol	9.1514	10.3576	14.7818	0	3.9572	8.5996	10.6701	1.7096	13.4435	8.3454	10.1184	8.439	11.5028	10.4769	7.9465	6.2975	11.4635	3.1244	8.2837	5.8408	7.6756	5.6188	7.0321	3.8703	9.7539	8.7878	10.6977	8.5561	10.259	8.1214	10.6261	2.5839	10.6323	11.624	8.014	9.1771	3.5728	11.8189	9.547	11.8221	9.6443	9.157	9.5373	8.9907	11.1087	13.0829	1.2403
TCGA-DM-A1HB-01	01	Tumor	10.8288	10.266	14.6433	0	4.3465	7.5358	10.3652	0.4885	13.9121	8.7961	10.6736	9.6863	11.7213	10.2574	8.2133	6.7682	7.2142	0.8528	11.0964	4.196	10.6928	6.4992	8.8096	2.0786	9.4441	9.2505	10.7469	8.5658	10.6812	7.2181	10.5887	5.2199	11.2298	11.4377	7.0129	7.8037	7.7125	11.7112	8.4937	14.1255	9.9459	9.1274	8.1995	10.1257	10.8903	13.6834	0.8528
TCGA-A6-2685-01	01	Tumor	8.3427	10.3318	14.5357	0.9252	4.2118	8.9964	11.2221	4.8514	13.6697	8.323	9.8024	8.9926	10.9259	11.0692	7.8012	6.5198	11.4783	4.7586	7.8157	5.5909	8.869	6.4103	8.7611	2.5715	8.5593	9.0103	10.1405	7.8878	10.2183	7.0714	11.5728	5.0208	10.5011	10.8884	8.5455	6.0313	7.1872	11.2465	8.7892	11.8778	9.9511	9.809	10.3064	10.4803	10.7692	12.914	1.8863
TCGA-F4-6704-11	11	Normol	8.4852	10.3474	14.5328	0.844	4.4109	8.3299	10.446	6.0311	13.6449	8.2878	9.8361	9.1882	11.4813	10.2886	7.8967	5.6176	12.4642	4.8089	9.6917	8.113	10.1736	6.9194	9.3392	6.7217	9.5505	8.9211	10.8503	8.4499	10.6208	7.4223	12.0661	4.7883	10.8071	11.7542	8.3634	9.4557	3.0277	11.4984	9.4968	11.8171	9.376	9.2163	9.3682	9.0616	11.0821	13.4929	2.4256
TCGA-F4-6856-01	01	Tumor	9.3355	10.8332	15.0871	0	4.3125	7.9443	10.6698	4.0938	13.5164	8.8699	9.8307	8.9434	10.8617	10.2648	8.1885	6.687	8.3701	4.0335	9.3214	5.424	9.2831	7.932	10.35	2.998	9.6573	9.1474	10.0159	8.7689	10.1586	7.1726	9.8823	5.081	10.714	11.2708	7.0333	1.2617	5.4928	11.5551	9.4466	12.2416	9.9088	9.5045	7.9402	9.613	11.051	12.9818	0
TCGA-AA-3492-01	01	Tumor	8.7084	10.4602	13.7668	0	5.1576	8.705	10.8662	0.9835	13.9607	8.4807	10.3183	8.7711	11.2172	11.0725	8.0491	6.8183	7.9585	7.147	9.2627	2.779	11.1023	6.7809	10.6798	4.6686	10.0147	8.7967	10.9427	8.2849	10.7396	7.4468	10.1381	3.5546	10.7201	11.4212	7.9698	2.9076	3.2183	11.7982	9.4109	12.3759	8.7855	9.6248	8.4508	10.0761	11.2608	13.7093	0.574
TCGA-G4-6294-01	01	Tumor	7.9784	10.8334	14.8467	0	3.3602	8.8021	10.7874	0.9463	13.3465	9.5679	9.7915	10.0994	12.1146	12.3045	8.167	7.0354	6.6531	2.6083	5.775	1.73	5.6999	4.6496	5.3688	0	9.0315	8.4587	10.1708	8.8203	10.3607	7.4341	11.0336	3.3602	10.5678	11.0326	6.8857	0	4.8714	11.4234	9.3263	11.7987	9.1795	9.9982	8.9487	8.9605	10.8333	12.9099	1.5129
TCGA-WS-AB45-01	01	Tumor	8.0116	10.5515	14.8691	0	6.5348	7.7128	10.4565	6.8129	13.6862	8.0144	9.173	8.4734	10.4344	10.6345	6.8181	5.5222	12.0066	3.7518	9.1339	5.474	9.7076	6.5597	5.3081	1.5904	8.8111	8.1771	9.9697	7.977	10.2464	6.7442	10.9678	4.3441	11.5692	10.792	9.4078	2.4397	5.9669	10.7033	8.5278	10.725	10.3109	8.645	11.2063	13.1608	10.5038	12.9445	2.3285
TCGA-CK-5916-01	01	Tumor	9.7932	10.5808	15.2617	0	6.2269	7.2472	10.0209	4.5146	13.2234	8.1293	10.3227	8.4754	11.2747	11.1666	7.8224	6.9152	9.3091	2.3683	8.5812	2.0435	10.6204	6.0793	9.4141	0	10.1491	8.3407	11.3309	8.0598	10.7451	6.3424	10.6706	4.8371	10.8391	10.7547	8.3314	5.7361	2.9571	11.3572	8.9295	13.2288	9.3477	9.1995	8.3727	10.0842	10.6534	13.2456	1.8488
TCGA-NH-A50V-01	01	Tumor	8.9547	10.5729	15.3369	0	4.9463	9.5682	11.0119	1.5037	13.5432	9.1585	9.7268	9.1596	11.5923	11.2391	8.0087	7.2901	9.0957	3.2111	7.8684	4.4963	8.0764	6.1999	6.7601	2.2239	8.506	9.2075	10.6512	8.4177	10.5076	7.3365	9.903	4.636	10.4262	11.537	7.2478	3.0597	7.106	11.1476	8.9693	13.1687	10.1944	9.3417	9.3833	10.531	10.3314	13.0332	3.1378
TCGA-NH-A6GA-01	01	Tumor	7.1282	10.6108	13.8767	2.9932	3.6821	7.1567	11.0549	1.0317	14.0503	9.7196	9.9092	9.3912	10.6631	11.1789	8.3135	6.9278	8.7548	7.3842	10.6634	7.6672	9.8774	8.7099	11.1865	3.6425	8.4038	8.9583	10.2038	8.2723	9.4339	8.0435	9.4641	4.1746	11.0322	11.177	6.4656	1.056	8.3768	11.8257	9.0264	11.2381	9.7308	9.2693	8.9981	9.5761	10.3759	13.2864	3.3293
TCGA-F4-6460-01	01	Tumor	8.4396	10.9751	14.3114	0	3.4471	9.0743	11.6541	3.8635	13.8688	9.2892	9.1352	8.9806	10.4581	11.0572	7.3315	6.6592	11.5795	4.9892	8.4611	6.1576	8.8151	7.2646	9.2819	2.6355	8.536	9.1544	9.5431	9.3066	10.0582	8.5541	10.5223	5.2876	10.1845	11.205	7.1995	4.6984	7.3032	11.8327	9.1478	11.2038	10.2133	9.1456	9.676	11.0841	10.9191	12.4331	2.6355
TCGA-F4-6806-01	01	Tumor	7.8501	10.9412	14.4399	0	3.5505	8.985	10.9016	3.4656	13.6032	8.8141	9.5762	8.8843	12.287	10.5016	7.7002	6.9244	9.1109	7.829	8.7672	8.2275	10.3669	9.3796	10.6924	5.1358	9.1231	8.8087	10.1978	7.8074	10.5142	7.4905	8.2467	3.6307	10.0982	10.9268	7.5992	5.8283	4.3987	11.0722	8.678	11.3975	9.6927	9.7364	8.6227	10.1928	11.1759	12.8569	2.1207
TCGA-G4-6304-01	01	Tumor	9.1224	10.8181	14.241	0	3.5211	9.5243	11.086	0	13.294	9.3861	10.006	8.9624	11.5754	10.5242	8.3249	6.7489	5.9775	5.4236	9.3127	6.8175	11.6229	7.3449	9.952	7.6	9.8049	10.1864	10.7229	8.9068	10.797	7.0914	10.3352	2.8306	10.0937	11.5671	7.0155	1.1523	6.7133	11.9214	9.3285	12.7196	9.9469	9.5184	8.449	7.3604	11.1478	13.399	5.2688
TCGA-QG-A5YW-01	01	Tumor	9.6435	10.9643	14.662	0.4848	4.8155	9.0163	11.0847	1.1363	13.3548	8.5296	10.6416	8.7332	12.028	10.337	7.2925	6.9497	8.241	5.8999	9.6239	6.5246	10.7566	7.4881	10.6577	8.4064	9.2623	9.5589	11.1873	9.1501	10.6193	8.3314	10.0469	4.9889	10.9311	11.6576	7.7107	4.2055	7.8842	11.8988	9.4503	12.5682	9.5013	9.746	9.1753	9.965	11.1039	13.2711	1.764
TCGA-AD-6965-01	01	Tumor	9.0482	10.3716	14.1088	0.6007	2.2065	8.2142	11.6045	2.0353	13.2834	9.503	9.586	9.3183	11.4325	11.3876	7.6797	6.7047	8.1579	4.2143	7.7949	3.5665	7.4854	7.3274	8.4412	1.841	8.7593	8.6242	10.1755	8.7443	10.3722	6.923	9.2042	5.0679	10.0003	10.8994	6.3862	2.0959	7.9804	11.355	9.3346	12.0091	9.7307	9.331	9.5909	9.779	10.8645	12.6285	3.29
TCGA-D5-6920-01	01	Tumor	9.5856	10.4575	14.4805	0.4789	5.65	8.4043	10.721	0.8379	13.5518	8.2471	9.816	8.9214	11.1229	10.4567	7.6735	6.1892	8.2928	6.2442	7.8264	7.3985	9.1871	7.0795	9.4312	4.8359	9.8317	8.5248	10.6554	9.0444	10.2697	8.1778	9.9768	5.0567	10.783	11.3037	7.6311	5.7064	4.0316	11.5698	8.7044	11.9642	9.5587	9.1379	9.1141	10.799	10.9837	13.2535	1.5697
TCGA-DM-A280-01	01	Tumor	11.5035	10.6046	14.1954	0	3.7528	8.1871	10.6968	1.7089	13.793	8.8815	10.1592	9.6637	11.2309	10.1083	8.2663	6.0601	8.5304	5.2214	9.2358	6.1682	10.4887	7.9823	9.936	6.5638	9.4239	9.0083	10.28	8.6934	10.8059	6.9554	10.0896	2.7383	10.5028	11.7396	7.3509	0.9907	6.2349	11.9299	9.6342	12.9912	8.9972	8.8519	8.1003	9.9764	10.8998	13.4471	0
TCGA-G4-6297-01	01	Tumor	8.3275	10.982	15.1987	0	3.9874	8.8098	10.6856	4.2643	13.9089	9.21	9.4154	8.8342	10.953	11.671	7.1046	5.906	9.9946	3.4043	7.5018	4.6964	7.7661	5.7983	7.1196	2.1229	8.6519	8.5093	9.9141	8.6093	10.0094	7.0844	10.7284	4.2643	9.9477	10.9389	7.6743	4.9936	5.5844	10.9212	9.1168	11.9587	9.8012	9.6226	9.9686	11.845	10.9544	12.4175	1.9547
TCGA-G4-6302-01	01	Tumor	8.4603	10.278	14.6207	0	4.9351	8.6285	10.8382	5.3646	13.3926	7.8238	9.3796	8.6706	10.5939	10.42	7.439	6.276	12.9728	7.7951	9.8438	6.3569	10.7858	6.765	10.2339	2.8363	9.0446	8.9695	10.1169	8.7137	10.3807	6.5669	12.3697	5.2634	10.2676	11.0043	8.1838	7.3035	7.6178	11.1042	8.608	12.0371	9.9975	9.009	10.3384	11.1559	10.802	13.1347	1.0818
TCGA-QL-A97D-01	01	Tumor	8.8474	10.6357	14.2018	0	4.8277	8.505	10.3711	0	13.5596	8.5131	9.3473	9.4879	12.3982	11.0636	7.3489	6.377	6.6123	1.2733	6.6736	0.9595	4.9429	4.8035	5.549	2.2567	9.2624	9.207	10.535	9.2186	10.4049	8.192	9.4514	5.242	11.1561	11.8742	6.7516	2.2961	4.2796	11.4893	9.697	12.6437	9.4765	10.1221	9.6871	9.3316	10.4888	13.5453	1.7492
TCGA-CA-6716-01	01	Tumor	8.8617	10.3936	15.6464	0	2.795	8.0494	10.592	2.704	13.6104	9.3087	9.8624	8.7481	11.3671	11.4839	8.3356	7.6336	9.4306	0.5103	6.6722	1.1845	6.0333	4.8582	3.9473	0	8.7735	8.8365	9.9832	8.1768	10.177	6.9249	9.9365	5.3977	9.6912	11.2691	5.0915	4.0091	3.9473	11.315	8.5103	11.2299	10.2587	9.8338	9.4872	10.9118	10.9304	12.6421	1.1845
TCGA-AA-3518-11	11	Normol	9.7092	10.4297	14.7089	0	4.9696	8.9931	10.7533	0.9619	13.6263	8.651	10.1684	8.651	11.5005	10.59	8.1852	6.6651	11.2264	10.4775	11.3833	11.6497	12.7531	11.5142	13.5321	6.6447	9.7825	9.0587	10.4942	7.572	10.391	8.0855	10.7471	4.3528	10.5869	11.6431	8.6544	7.3314	4.015	12.1185	9.9964	12.0002	9.6669	9.183	8.8946	8.3555	11.2856	13.3116	0.5597
TCGA-AA-3531-11	11	Normol	8.706	10.5405	14.4159	0	4.3396	8.4961	10.4864	1.9285	13.9612	8.1864	9.5849	9.6273	11.4328	11.0474	7.6659	6.3072	10.2373	12.081	11.7502	12.1563	12.9803	11.7561	14.0874	5.8663	9.5737	9.2519	10.3215	8.1138	10.3977	8.8645	10.0421	1.5873	11.4042	11.5921	9.1041	8.3911	4.1571	12.4104	9.7125	12.4614	9.6067	8.8973	8.3654	7.6995	11.5212	13.6579	1.5873
TCGA-CA-6715-01	01	Tumor	9.6538	10.5795	14.5395	0.4536	2.113	9.0713	11.5945	2.71	13.3944	8.8755	10.3167	9.2164	12.0156	11.2739	7.8761	6.8842	7.9295	1.5098	7.4638	0	6.3949	5.6693	7.5201	3.4565	8.1963	8.6037	10.2563	9.6856	10.2357	7.1211	11.4675	5.9276	11.332	10.7826	6.2412	7.8738	3.5953	11.254	8.8408	12.102	9.2527	10.261	9.2778	10.2334	11.6293	11.9028	1.0763
TCGA-CM-4743-01	01	Tumor	8.9936	10.65	13.6947	0	6.8448	7.8696	10.8436	1.1669	13.4666	8.2189	10.1863	10.3504	11.0477	11.1269	7.8619	7.0403	8.7503	6.9357	9.6758	4.0502	11.9444	6.6529	10.3233	1.1669	9.435	8.7037	10.7016	8.792	10.2755	7.5093	10.9439	5.8496	10.7457	10.6332	8.0051	3.2124	3.5342	11.5673	9.8553	12.5117	8.573	8.6439	7.8658	10.2892	10.3978	13.4013	2.0403
TCGA-A6-6654-01	01	Tumor	7.7894	10.4036	14.8007	0	6.4243	8.6312	10.8729	4.4052	13.8567	9.2638	9.3532	8.6494	10.2619	11.0934	6.5707	6.4601	11.0024	6.79	8.491	4.9883	9.0524	7.12	8.728	2.8921	8.7218	8.273	9.697	7.9678	9.8698	6.8137	11.0919	5.508	10.3859	11.1204	9.1581	6.7971	4.6357	11.3836	8.6885	11.2844	10.2281	9.1199	9.9964	11.8447	10.9822	12.7531	1.7199
TCGA-5M-AAT5-01	01	Tumor	8.3529	10.7326	13.4367	0.9922	4.3427	9.1581	11.5602	1.5746	13.5562	8.8556	10.1872	9.8898	12.0161	10.9393	7.3682	6.6056	7.1544	3.7404	7.7821	3.4452	6.8914	6.0507	9.3659	4.6289	8.8078	8.2905	10.7472	8.7001	10.3007	8.3486	8.864	5.8301	11.0775	11.3239	6.242	4.5929	5.9035	11.8875	9.2216	11.7455	9.6064	9.6384	7.7493	8.8883	10.6194	13.8285	0.5798
TCGA-G4-6627-01	01	Tumor	8.5138	10.2754	14.4888	0	4.7647	7.9864	10.6768	5.6813	13.4535	9.0234	9.8251	9.1661	11.4549	11.2184	7.3599	6.7383	11.2634	7.4346	9.4379	8.4517	10.1713	8.9208	10.7623	4.0358	9.2292	8.6675	10.1687	8.357	10.3316	7.2028	11.7391	1.0192	10.4465	11.689	7.7962	6.7562	5.0814	11.3242	9.5068	11.8671	9.5821	9.4979	9.2849	10.1295	10.9045	13.1967	1.0192
TCGA-A6-5664-01	01	Tumor	9.5127	10.4634	15.237	0	5.013	7.8268	10.4377	5.4735	13.1304	8.3407	9.7461	8.9597	10.8924	10.7254	7.0621	5.7107	10.1847	4.6602	8.7798	6.3539	10.2156	7.0108	8.6005	5.3133	9.2669	8.6331	10.433	8.4939	10.064	6.582	10.635	4.5204	10.4359	10.9086	7.9104	8.3817	6.4572	11.2014	9.0011	11.4887	9.9964	8.9207	10.0659	10.7964	10.66	13.5264	8.6246
TCGA-CM-6167-01	01	Tumor	8.1631	10.2462	14.5149	0	4.0328	8.7437	10.464	7.9259	13.3627	8.722	9.7922	9.0538	10.7934	11.0435	7.8182	6.7891	12.9616	1.8678	8.147	4.0328	6.9901	5.7966	5.3105	2.5284	8.428	9.0204	10.0366	8.3764	10.4567	6.7766	13.0192	2.7718	10.2963	11.303	7.8216	6.3998	5.2715	10.9124	9.035	11.7004	10.0978	8.933	10.2933	10.715	11.149	12.7224	2.7718
TCGA-AA-3534-11	11	Normol	9.4436	10.555	14.5526	0	4.9916	8.6656	10.7889	2.4524	13.5697	8.7379	9.9663	8.8679	11.5488	10.361	8.0521	6.5041	10.311	9.8423	10.7261	10.4625	12.3543	10.3826	12.7254	5.664	9.5508	9.1025	10.5147	8.007	10.3917	9.0802	10.2831	3.8499	10.5815	11.5093	8.6953	8.1941	4.8985	11.9937	9.5612	11.8435	9.5296	9.2927	9.1155	8.6243	11.1556	13.4433	2.8994
TCGA-AD-6548-01	01	Tumor	8.9511	10.6298	14.0705	0	5.6679	7.8286	11.7076	2.3464	13.6175	9.123	10.2717	9.4232	11.8856	11.3671	8.1832	6.2589	9.2864	4.8264	7.8441	5.5088	8.7049	6.0073	8.6399	3.3202	8.8216	8.7301	10.6494	8.1762	10.3531	6.1552	11.0064	4.1162	10.9596	11.1138	8.1168	5.746	5.456	11.5057	9.2108	12.3495	9.3752	9.8836	9.5472	10.4802	10.6775	13.114	2.9139
TCGA-F4-6805-01	01	Tumor	8.78	10.572	14.6585	0	4.9948	7.9449	11.2138	4.1576	13.3615	8.2296	9.3351	8.6285	10.8578	11.2125	7.6863	6.3048	11.2887	5.8082	8.147	5.5561	10.3056	6.954	9.4619	1.6988	8.8378	8.4731	10.6507	8.0729	10.1596	5.8649	11.2173	2.9521	10.4076	11.0188	8.0029	5.1082	6.5054	10.8221	8.7445	12.359	9.6622	9.1043	9.7476	11.107	10.6549	13.1139	1.4248
TCGA-A6-6780-01	01	Tumor	9.8631	10.9453	14.1307	0	6.6979	9.2039	9.9952	0.5795	13.6334	9.0326	10.3017	9.2562	11.7102	10.4943	9.0429	7.1275	7.6595	3.8426	8.8037	2.1571	10.5188	5.8664	9.4045	7.301	10.5125	9.1089	11.0865	7.425	11.0162	7.9892	10.6332	5.3933	11.0696	11.7548	9.1684	8.3829	8.0361	11.4194	9.5675	12.5986	8.9069	9.2786	7.7418	9.3531	11.2762	14.4432	3.3071
TCGA-DM-A1HA-01	01	Tumor	6.5734	11.2347	14.1469	0.4847	5.0934	8.2482	11.7466	0	14.1695	9.9805	9.702	9.5261	10.9656	11.059	8.0796	8.0309	7.2088	2.8051	7.8886	2.2046	6.6727	4.47	5.5021	1.3769	8.3021	9.2286	9.6574	9.6325	9.7466	6.3085	9.3902	5.3829	10.0272	10.698	6.5428	1.1621	10.6622	11.3113	8.4836	11.6314	10.2361	9.4029	7.2735	7.5503	10.5869	12.8304	1.1361
TCGA-CM-6676-01	01	Tumor	8.5384	10.2837	14.9045	0	2.9758	9.6441	12.4712	2.9758	12.8622	9.2975	10.7748	9.2374	11.7834	10.7702	8.0189	6.3943	9.8379	3.3238	7.7377	3.3238	7.8707	6.6397	8.6975	4.433	8.9711	8.9349	10.4271	8.5427	10.1313	7.9948	10.5944	5.9629	10.1147	11.3281	6.9662	1.6535	5.0712	11.4966	8.9222	12.1859	9.854	9.5758	9.5865	10.0146	11.5753	13.1814	2.0016
TCGA-A6-6650-01	01	Tumor	8.7686	10.7303	14.1374	0	3.1315	8.9312	11.0131	0.4732	13.5697	8.7249	9.709	9.9274	12.446	10.9775	7.5283	5.6186	7.5343	1.114	4.3511	1.114	3.2539	3.5691	3.1315	1.352	8.8916	7.7961	10.9613	8.8098	10.5072	7.0295	9.805	4.507	10.9789	12.2873	6.8225	1.5562	4.1763	11.6066	9.5009	11.5676	9.8445	9.8762	7.9052	9.8948	10.8837	13.4664	1.352
TCGA-AA-3713-11	11	Normol	10.1908	10.3395	13.7417	0	4.1605	8.8447	10.5788	2.7701	13.8699	7.8867	11.2501	9.5172	11.7814	10.7939	8.6639	7.4565	9.9808	7.7459	9.9666	8.4524	11.5925	9.0817	11.6157	6.9858	10.5362	9.0376	11.2951	7.9706	11.2006	7.4896	10.7556	4.4179	10.9528	11.951	8.7444	6.8225	3.7874	12.0041	10.43	12.3804	8.3987	9.0405	8.4331	8.2156	10.9388	13.7645	1.4576
TCGA-NH-A6GB-01	01	Tumor	9.293	10.2976	13.5487	0.6939	4.8165	9.0407	11.8189	2.0315	13.5446	8.8545	9.8027	9.1356	11.2128	10.8302	7.5367	6.3439	6.5106	4.1438	7.7041	2.2345	6.481	5.7415	7.5839	0.7479	8.4863	8.2638	10.3025	8.2504	9.6241	7.3251	9.943	5.5069	10.8722	11.3316	7.2274	5.1651	7.7628	11.3695	9.2571	12.0856	9.9412	8.9346	7.7872	9.7933	11.3537	13.3562	0.6939
TCGA-A6-6652-01	01	Tumor	8.8727	10.1421	14.3554	0	2.8365	8.8577	11.6439	0.5249	13.8795	9.6151	9.3976	8.4968	10.6012	12.0361	7.8039	6.8839	7.4088	0.5249	7.0561	1.2119	4.4635	5.0265	6.081	4.9871	9.9742	8.23	10.1884	9.1629	10.0896	7.0797	9.848	5.2257	10.0041	11.2059	5.2425	0.5249	5.1385	11.5387	8.318	11.0826	10.8895	9.1424	8.4083	9.5209	9.7882	12.8121	0.9089
TCGA-CM-6164-01	01	Tumor	7.9255	10.5081	14.1418	0	4.4439	10.0447	11.339	3.9155	13.3061	9.0375	9.7684	9.4625	12.2232	11.3228	7.4319	6.4673	9.1683	4.3682	8.4945	4.4922	8.8595	7.522	9.3299	5.1339	8.4569	9.0712	10.2057	8.6158	10.4183	7.9167	10.6009	5.4719	10.4002	10.7956	7.6606	2.0368	6.4059	11.5897	9.1627	11.2403	9.5936	10.1506	8.7394	9.5341	11.2654	12.6828	1.6892
TCGA-D5-6536-01	01	Tumor	7.8562	10.6251	14.095	0	5.055	8.5123	10.6263	2.4456	14.6296	10.0983	10.3914	9.0399	10.5181	10.5995	7.3119	6.2053	9.0611	3.7852	8.1411	4.274	8.0772	6.7809	7.0943	4.1439	8.9109	8.4767	9.1751	9.9969	10.2	7.64	9.477	4.5384	11.0086	10.6261	7.2813	7.987	6.675	11.6057	8.3149	12.0476	10.511	9.5416	8.7965	11.6246	10.8774	12.5815	0.6377
TCGA-G4-6588-01	01	Tumor	8.8863	10.5544	14.2966	0	5.0465	7.0301	10.0546	2.1716	13.6392	9.1366	10.555	8.8319	11.3266	10.5739	8.1671	6.3585	8.0709	5.8223	9.3542	7.0949	10.2183	7.7966	10.2905	0	9.7545	8.7009	10.9997	9.4206	10.4647	7.6991	9.9151	5.757	11.2634	11.3589	7.3509	2.5868	7.6781	11.2704	8.7386	12.6811	8.9534	9.2823	8.162	10.5548	10.8029	13.625	2.1716
TCGA-4N-A93T-01	01	Tumor	7.9156	10.8654	14.4335	0	2.284	10.2483	11.1331	0	13.6632	9.7661	9.6627	10.2134	11.4736	10.1473	7.0924	7.172	6.5677	1.5535	6.6254	5.8721	7.2792	6.5152	7.0508	6.3709	7.8922	9.6702	9.8579	9.4702	10.4047	7.9527	10.1986	4.1251	10.063	11.0472	7.6357	1.4085	4.2029	11.9107	9.4897	12.9306	10.2058	9.6043	9.5252	7.2149	10.7863	13.0075	1.2936
TCGA-A6-2684-11	11	Normol	9.1476	10.4377	14.4301	0.5768	4.1465	9.1834	10.9047	1.3071	13.7981	8.8067	9.9568	9.025	11.6797	11.0653	8.3262	6.2883	9.2778	10.7221	12.0377	11.1788	12.3012	11.5986	13.8519	6.0416	10.1457	9.4509	10.4346	8.2897	10.6235	9.8199	9.7301	4.3339	10.5797	11.5192	8.9439	6.9518	4.731	12.5375	10.1275	12.4336	9.6494	9.3331	8.453	8.2348	11.3321	13.8037	1.3071
TCGA-F4-6459-01	01	Tumor	9.3879	10.6576	14.254	0.5132	3.3177	8.5776	11.3635	3.9564	13.4408	9.5131	9.4476	8.87	10.4984	11.1036	7.2214	6.2335	11.4471	4.7579	8.942	5.3327	9.7885	6.7971	8.592	6.8462	9.0283	8.4263	10.193	9.1047	10.4769	7.4883	11.2855	5.81	10.3315	10.8491	7.926	7.6023	5.8745	11.0188	8.9344	11.367	10.0157	9.3791	9.6481	10.9151	10.9394	12.2459	0.5132
TCGA-T9-A92H-01	01	Tumor	9.2491	10.9143	14.4994	3.5258	3.2348	9.1617	11.8144	1.1777	13.4884	8.7292	10.4289	9.6707	12.4718	10.4536	7.7463	6.8666	6.3236	2.2589	8.6032	3.3583	7.4595	6.1029	7.1533	6.361	9.3296	9.0332	11.1817	8.5687	10.2278	7.6589	10.4155	5.6381	10.5495	11.5164	6.2052	0	4.2226	11.8138	10.309	12.3941	9.3465	10.0244	9.1436	8.9533	11.2511	13.2009	1.1777
TCGA-D5-5538-01	01	Tumor	8.8127	10.6834	14.5488	0	5.8781	7.9343	11.3042	3.984	13.9291	8.3799	9.933	9.3645	12.3186	11.8388	8.0705	6.3921	9.3753	3.7391	6.5606	3.984	6.3582	5.2502	5.8162	2.1567	8.6554	8.3839	10.7196	8.3721	10.4465	6.4508	11.0308	5.1929	10.7586	11.3358	8.5472	8.0415	4.6275	11.0631	9.2661	12.3653	9.4363	9.8241	8.9445	10.9357	11.138	13.1976	1.5736
TCGA-CK-4948-01	01	Tumor	8.6616	10.6595	13.8883	0	3.7549	9.0398	11.8677	4.3511	13.5587	8.9875	10.1452	9.0833	12.0352	10.829	7.7381	6.3366	8.6698	5.0969	8.2664	3.7896	7.9697	7.0861	9.0398	3.9821	9.509	9.0308	10.7232	8.7402	10.4455	7.7044	10.092	6.1906	10.5194	11.4758	7.5227	3.8945	7.1034	11.1899	9.2839	12.1476	9.4854	9.7735	9.5913	11.2266	11.0449	13.795	1.2115
TCGA-AA-3506-01	01	Tumor	8.8453	10.5167	14.0149	0.5356	5.4935	8.8924	10.9464	3.1844	13.753	9.2032	10.7055	9.1618	11.5637	10.7279	8.18	6.2233	9.147	7.2985	10.0914	7.5545	10.2161	8.5437	11.0347	5.6042	9.3603	8.9811	10.0529	8.8912	10.0443	8.2731	10.1886	4.1764	10.6542	11.2648	7.4582	4.6284	4.6849	11.8161	9.6006	11.4087	9.8007	9.7411	9.0153	10.5798	11.0524	13.8217	2.2003
TCGA-CM-6166-01	01	Tumor	8.3652	10.4148	14.9345	0	2.5337	8.8632	11.363	1.7635	13.2617	8.7623	11.3406	9.6446	12.2606	11.7661	8.1929	6.9721	8.671	4.7733	8.9669	2.8049	10.1441	6.8426	9.9109	7.0846	8.1171	9.0846	10.742	7.9332	10.5649	7.5533	11.9015	4.7733	10.3434	10.6528	5.5941	2.1747	5.6294	11.8824	9.7446	12.041	9.3379	9.8019	9.2793	9.5566	10.58	13.5866	0.677
TCGA-CK-5914-01	01	Tumor	9.1176	11.0856	13.747	0	5.0084	8.2496	10.0759	1.1474	13.1783	9.048	10.3376	8.6245	11.6864	11.5227	7.6282	7.1492	6.9651	1.9393	8.0123	1.597	6.2466	5.799	6.3998	3.0514	8.9134	8.4534	10.5718	8.3658	10.1009	6.5064	9.3777	5.1302	11.3644	11.6682	6.6817	3.7113	6.0222	11.3787	9.383	11.2395	8.9469	9.3118	8.4913	10.4096	10.9484	13.1792	1.597
TCGA-AY-6196-01	01	Tumor	9.7917	10.4723	13.6745	0	5.917	8.96	10.2141	5.9313	13.4397	9.0921	9.1194	8.4868	10.4927	11.0789	6.9407	6.8536	12.8817	6.2823	10.8214	7.1564	9.8881	7.4319	9.814	7.1381	8.3422	8.9876	9.4406	8.7154	9.8706	6.4201	10.9609	3.5612	11.2045	10.2606	9.3795	7.4457	5.5241	10.7064	8.3071	11.1719	10.927	9.2388	10.1725	11.3985	10.8057	12.0952	4.8079
TCGA-F4-6809-01	01	Tumor	8.4965	10.9117	14.8236	0	3.4815	9.9131	11.0778	3.178	13.8049	8.9429	9.8353	9.4792	11.2582	11.2066	8.0052	7.1378	11.6093	6.0591	9.441	6.84	10.805	8.0265	10.1112	6.4711	8.2737	9.3808	10.2012	9.2932	10.5468	7.6811	10.3284	5.9044	10.4752	10.7571	7.7734	6.5322	7.9933	11.5529	9.1931	12.2004	10.1397	9.2529	8.9893	9.3024	10.0695	13.0628	3.2441
TCGA-CM-6171-01	01	Tumor	8.4027	10.3536	15.1441	0	5.565	7.3121	10.2382	0.536	13.5785	9.2963	10.3047	8.9113	10.7493	11.6885	7.6685	6.1165	7.3682	1.2325	8.3892	1.2325	9.1437	5.5232	6.9626	3.0353	9.295	8.1451	10.3275	9.2951	10.4555	6.7559	10.4019	4.8969	11.5919	11.0822	7.8284	4.6236	3.4459	10.6987	10.0951	11.3059	10.3057	8.6189	8.9248	10.3421	10.8946	13.5939	1.2325
TCGA-CM-5863-01	01	Tumor	8.2224	10.369	14.9778	0	4.3041	8.1313	11.4311	3.3415	13.7115	8.7981	9.8079	9.0472	10.6874	11.0653	8.0181	6.5443	9.7846	8.8568	10.1175	7.9719	11.2309	9.7293	11.7671	5.6997	8.682	9.0706	9.941	8.9079	10.1018	7.5987	9.9016	4.4698	10.166	10.9229	7.577	3.9986	7.7989	11.5908	9.1906	12.1706	10.0621	9.1721	9.1989	10.7491	10.9165	13.207	0.5665
TCGA-D5-6539-01	01	Tumor	9.3338	10.7717	14.7976	0	3.857	7.451	10.5832	5.8975	13.7503	8.6902	9.4055	8.8	11.2715	10.7835	7.5	5.8401	9.1803	7.83	8.7099	8.0048	9.6051	8.483	10.5946	2.0896	9.5999	8.4507	10.6608	8.0341	10.5143	7.6209	9.3001	4.1111	11.0463	11.5626	7.8878	3.9778	5.2205	11.2828	9.2711	11.8526	9.7138	9.0934	9.7578	10.5161	10.92	13.1345	2.2392
TCGA-A6-5665-11	11	Normol	9.3962	10.2155	14.3632	0	4.1886	8.5061	10.244	2.272	13.6617	8.4985	10.2706	9.1893	11.5275	11.622	7.6813	6.5079	10.4114	11.2341	11.9384	11.8009	13.0435	11.7079	13.7342	6.8408	10.0394	9.1082	10.6195	8.8306	10.5561	8.5559	9.9017	1.8292	11.1096	11.9006	8.6321	8.1176	4.1372	12.4318	10.34	12.152	9.5589	8.7952	8.6574	8.2152	11.3169	13.9084	2.6104
TCGA-NH-A8F7-01	01	Tumor	8.24	10.3194	13.8967	0	3.4934	10.1312	10.996	0.9508	13.1243	9.6114	9.9889	8.8426	12.6543	11.1591	7.8574	7.0299	7.9031	0	6.669	0.5524	5.1121	5.0925	6.1396	1.2627	8.6109	8.8601	10.2799	9.4442	9.6673	8.5814	9.6482	4.5763	11.1422	11.5261	6.4088	0.9508	6.0612	11.9157	9.4167	11.3467	9.6607	10.4444	8.5947	8.2488	11.4205	12.9708	1.2627
TCGA-D5-5541-01	01	Tumor	9.5331	10.7139	14.5057	0	4.878	8.5364	11.752	4.1513	12.9458	9.45	10.1239	8.6866	11.3471	11.9959	8.0379	7.015	8.5628	4.3091	7.433	3.2038	6.9958	6.9526	8.6241	4.6804	8.6279	9.156	10.645	9.0832	9.9994	7.0302	11.4995	5.3347	10.677	11.302	8.1568	6.6804	5.3469	10.9941	9.4857	12.021	9.4726	9.8879	9.5022	9.5937	11.5664	12.8819	1.0191
TCGA-F4-6808-01	01	Tumor	8.942	10.5913	13.829	1.4731	3.2155	9.9501	11.2637	1.752	13.931	9.5314	10.3017	9.6802	12.3431	11.7964	6.9351	6.6162	7.3507	3.4679	8.5963	4.0863	7.1668	7.3818	8.7629	5.2593	9.0065	9.4663	10.3606	8.608	10.5985	7.7701	10.2029	5.809	9.6947	11.5637	6.6162	0.8187	5.1432	11.6598	10.0282	12.3557	8.8817	10.1711	8.8169	9.5889	11.2252	13.0797	1.127
TCGA-A6-2680-11	11	Normol	8.1251	10.018	13.5924	0	4.5186	9.1812	10.4645	0	13.6583	8.6712	10.4874	9.7039	11.2338	12.4621	7.6994	7.0727	11.4245	12.8459	11.8487	11.9704	13.4204	12.1566	14.1539	8.5097	9.1501	9.7614	9.879	8.5715	10.0536	9.3833	10.711	3.5062	11.989	11.3175	9.2203	6.8226	6.3204	12.152	10.0296	12.4369	10.0921	8.6958	8.9704	8.5471	11.2661	13.5129	2.8029
TCGA-AA-3511-11	11	Normol	9.1271	10.5665	14.8098	0	4.2761	8.6627	10.3403	0	13.5291	8.5568	9.8002	9.0188	11.4054	10.4534	8.0203	6.5583	10.2043	8.8308	10.1049	10.0553	11.8599	9.9838	12.3285	5.635	9.5009	8.9521	10.6526	7.598	10.6062	8.0852	10.2734	3.4124	10.6285	11.4911	8.2618	8.5971	4.5267	11.5647	9.1188	11.5124	9.6211	9.2504	8.9197	8.4945	11.1328	13.2141	3.6942
TCGA-DM-A285-01	01	Tumor	8.7455	11.0588	14.2783	2.3254	2.4267	9.0345	11.6093	3.6635	13.3614	9.2493	9.9359	9.0848	10.8148	10.298	7.9727	6.9768	9.4836	3.9283	8.135	6.7725	9.2373	7.1023	8.8415	6.0506	8.9772	8.6452	10.4186	8.7819	10.2313	7.4052	10.6119	4.0915	11.3656	11.5935	7.7898	1.8291	6.3698	10.9296	9.4989	12.4602	9.6315	8.6094	9.6242	11.1013	11.4191	12.8731	0.7904
TCGA-AA-3522-11	11	Normol	9.8542	10.3668	14.4582	0	4.6012	8.6278	10.6546	1.2693	13.6366	8.5811	10.0042	8.9988	11.7318	10.5261	8.1876	6.512	10.0211	8.7139	10.3841	10.3167	11.9458	10.2047	12.4574	5.2884	9.8803	9.0028	10.7354	7.7291	10.5826	8.7139	10.2692	3.4887	10.5806	11.7622	8.5647	7.4457	3.7378	12.2327	9.8985	12.1122	9.6432	9.162	8.9492	8.8167	11.266	13.6018	2.8062
TCGA-G4-6314-01	01	Tumor	8.6226	10.5807	14.6791	0.5162	2.9787	8.7376	11.5212	5.6325	13.1806	9.1813	10.2926	8.9657	10.8935	10.3377	7.3951	6.0414	11.5245	0.8955	7.3915	2.8977	6.4925	4.7676	5.037	0	8.6782	8.7678	10.2471	8.1662	10.2719	7.4983	11.4298	5.6937	10.4926	10.7285	7.0836	6.7122	5.8948	11.3337	8.84	10.6782	10.0125	9.4215	9.7965	11.9286	10.9837	12.964	1.1957
TCGA-A6-6781-01	01	Tumor	9.03	10.7311	14.8279	0	6.0763	8.9275	10.1787	6.0136	13.4658	8.7924	9.3307	9.2556	10.2379	10.2701	6.9752	6.3289	10.3479	4.7196	10.5878	7.7721	11.5909	8.8109	9.1815	6.7629	8.9075	9.4116	9.7148	9.1733	10.1629	6.5215	10.7683	2.5317	10.9099	10.4486	8.7239	5.7654	5.6095	11.6173	8.8323	11.5005	10.7049	9.572	10.2178	12.6405	10.8295	12.7643	2.8514
TCGA-F4-6807-01	01	Tumor	8.2723	10.5729	14.3586	0	5.842	8.3244	11.0538	4.8796	13.4297	8.25	9.6938	9.1892	11.2757	11.1777	7.536	6.1867	10.9913	3.0425	7.544	4.2938	7.2769	5.4567	6.1873	2.3608	8.8524	8.6556	10.6408	8.3094	10.4223	7.0979	10.8557	5.4396	10.639	11.0676	7.7997	5.9773	6.1352	11.1172	8.9431	11.3627	9.4923	9.2479	9.7048	10.6134	10.7567	12.8771	2.3608
TCGA-AY-A54L-01	01	Tumor	9.1733	10.9381	14.585	0	2.5021	8.8223	10.9732	0.5101	13.4012	8.776	9.6848	9.078	11.8135	11.5861	7.8614	6.7701	5.6372	5.7323	8.7055	5.3677	7.908	7.1127	9.412	3.3083	9.3364	9.1259	10.6283	8.6761	10.3109	7.3374	10.1533	4.2972	10.4854	12.1906	6.6715	0.8861	5.1609	11.0531	9.5301	12.1127	9.2375	9.6506	8.0394	7.5017	11.1814	12.9868	3.1791
TCGA-A6-5661-01	01	Tumor	9.777	9.6504	14.5172	0	5.0772	7.3209	10.2277	0	13.2342	8.3392	10.4519	8.4676	11.4539	10.8232	7.5588	6.3299	6.9138	5.4459	8.8924	5.3906	10.196	5.9829	8.0076	0	10.0565	8.6984	10.9349	9.1857	10.4375	7.0359	10.4108	2.9169	10.9876	11.6971	7.2528	3.4744	5.7392	11.3418	9.5388	13.0105	8.9244	8.97	7.9844	10.0893	10.8462	13.6985	1.3994
TCGA-DM-A288-01	01	Tumor	10.2098	10.9394	14.2496	0	1.696	8.8478	11.0114	3.0496	13.6524	10.0531	9.7599	10.1284	11.4669	11.644	7.4754	7.4198	7.5462	2.9486	6.4469	1.926	8.6689	4.858	6.3806	4.5135	8.3203	7.9798	10.3703	8.3028	10.4184	7.2656	10.3264	1.4222	10.4926	11.4836	6.5103	1.5269	5.3491	11.4845	9.1071	12.0897	9.3015	9.1716	7.4934	9.4818	11.405	13.2001	0
TCGA-QG-A5YX-01	01	Tumor	9.2051	10.4075	14.2096	0.4949	2.7502	8.7585	11.1503	0	13.3741	8.4938	10.2564	9.2532	12.3275	10.872	8.5632	6.8419	5.6931	5.6931	8.7734	5.0935	10.333	7.1761	9.979	5.6109	8.9425	8.4428	10.8644	9.5176	10.4393	7.4837	8.0538	5.5366	11.1043	11.5567	7.5978	0	4.1182	11.9396	9.7677	12.1371	8.7612	9.6548	8.9293	8.8107	11.9074	13.2358	1.6068
TCGA-A6-2679-11	11	Normol	9.5923	10.4023	14.2798	0	5.6995	8.5241	10.6393	0.58	13.6757	8.444	9.9925	9.0129	11.5517	10.4154	7.682	6.674	10.2853	9.2622	10.3209	9.6521	12.2189	9.8638	12.097	2.3099	10.0382	9.2727	10.4922	8.3337	10.4868	9.3975	10.7344	3.9401	10.7022	11.5732	8.5793	7.6017	4.6294	12.2593	9.4987	12.3525	9.348	9.2717	8.9934	8.7246	11.1622	13.5684	3.1565
TCGA-AD-A5EJ-01	01	Tumor	10.0183	10.5671	13.9618	0	5.5029	7.728	10.8522	1.781	13.7389	9.058	10.0447	9.3987	11.2304	10.4663	7.9827	6.2114	8.1628	3.773	9.4255	1.781	11.1657	5.1138	8.1823	1.2998	9.5564	9.021	10.5896	10.0627	10.1578	6.815	10.4752	4.8469	11.0344	10.9417	7.0239	3.6746	8.4469	11.4119	9.4448	11.9255	10.0183	8.2229	7.8366	10.1663	10.6084	13.6436	1.9723
TCGA-G4-6628-01	01	Tumor	9.4131	10.5055	14.1396	0	6.5269	5.5552	10.7941	2.9323	13.4349	8.0768	10.3455	9.1085	11.2109	11.4546	7.1619	7.6586	8.9794	5.1291	9.2029	8.7775	11.9729	6.5269	10.0519	0.5339	9.7476	9.2819	10.5606	8.3718	10.4961	6.5462	11.3658	6.2487	10.4129	11.3263	8.487	7.015	3.5582	10.762	8.8466	13.3538	9.8028	9.1431	8.3286	8.8888	10.7623	13.3194	2.8518
TCGA-D5-6531-01	01	Tumor	9.4352	10.5512	14.1672	0	5.8624	8.2173	11.4548	0.595	13.1758	9.2745	9.8802	8.6429	11.8606	10.9563	7.6556	6.1569	8.9142	2.346	9.598	2.4841	8.9019	6.5216	8.7949	2.7259	8.6168	8.7562	10.3033	8.1768	9.1333	7.1847	10.7816	4.2764	11.1159	11.4135	7.3428	2.787	10.0806	11.9307	9.1175	11.2948	9.8534	10.2483	8.7647	10.5865	10.5933	14.0864	4.5206
TCGA-DM-A28M-01	01	Tumor	9.0688	10.8842	14.7112	0	2.6067	8.1658	10.5893	0.4474	13.7475	9.1731	11.1068	9.1541	12.0544	10.4979	8.5805	6.9162	6.6107	3.6595	7.6221	3.282	9.8125	7.0671	8.7412	4.7451	10.1893	9.1994	10.4292	8.3703	10.1394	7.7688	9.9947	4.8027	10.9237	11.7357	7.0153	1.2321	3.8893	11.6306	9.0619	13.1945	9.2356	9.5738	8.2423	8.8105	11.3184	13.7237	0
TCGA-CK-6751-01	01	Tumor	9.1611	10.7597	14.3366	0.5909	3.4084	8.0945	10.8726	4.4764	13.639	8.0667	10.4728	9.0346	11.1754	10.529	8.0456	6.6323	8.8522	5.0396	8.6139	5.6024	11.2174	7.7456	10.3654	6.126	9.8291	8.7626	11.0845	8.3368	10.6589	7.0566	8.2125	5.5252	10.7643	11.3988	6.8568	0.6802	3.8239	11.7025	8.8347	12.9847	9.005	9.1748	8.6214	11.0543	10.9537	13.5926	2.0134
TCGA-F4-6854-01	01	Tumor	8.0785	10.3626	14.418	0	4.6018	9.0448	11.3573	2.7137	13.6427	9.4102	9.7629	9.2514	12.1586	11.4338	7.3995	6.7704	9.9314	4.4723	7.8433	5.0278	7.8169	6.7129	8.5544	3.2234	9.5913	8.8683	10.1319	9.8173	10.1615	8.0654	10.1121	5.5506	10.8794	11.6294	7.1576	3.3094	6.6643	11.6907	9.0391	12.1084	9.7086	10.3908	10.0305	10.3968	10.6113	13.1053	2.2698
TCGA-A6-2683-11	11	Normol	9.4674	10.3532	14.7731	0	4.3573	8.5728	10.5845	0	13.6009	8.4397	9.981	9.1013	11.8576	10.4842	8.3921	6.7623	9.9235	8.9308	9.8159	8.4317	10.4763	9.1226	11.7788	4.1191	9.8692	8.8969	10.681	7.8373	10.7156	8.2662	10.102	3.527	10.7509	10.938	8.5743	8.6053	3.4774	11.962	10.1399	12.2655	9.2107	9.2406	8.9694	8.1099	11.2631	13.5983	1.356
TCGA-A6-6142-01	01	Tumor	8.5413	10.7756	15.1779	0	4.739	8.7436	12.1844	5.0753	13.603	8.7044	9.5391	9.7241	10.8243	11.2374	7.5675	6.0913	9.9282	5.7118	8.1779	5.2405	8.1633	7.1654	8.4575	4.1175	9.43	9.2916	10.0776	8.8059	9.6806	7.5497	10.2837	4.9446	9.8408	11.0354	7.3779	2.0547	6.9368	11.0478	9.5061	11.4354	10.3633	9.4611	9.5234	11.653	11.2443	12.8876	0.6638
TCGA-NH-A8F8-01	01	Tumor	8.5805	10.8232	14.7308	0	3.3985	9.568	11.5437	2.9519	13.4703	9.5216	9.8286	9.8307	11.4448	11.4773	7.0425	6.665	9.5775	0.6429	6.7125	1.6986	6.0101	4.4446	3.5445	0	8.2674	9.0156	10.2326	9.1793	9.6459	8.2029	9.0724	5.3919	9.7698	10.9399	6.3746	3.1094	5.5033	11.4018	9.0327	12.091	10.2061	9.4746	8.9084	10.3831	11.2088	13.2656	1.0861
TCGA-AM-5821-01	01	Tumor	9.4199	10.6583	14.2793	0	9.5725	7.0467	11.1372	0.6106	13.7893	9.1031	10.2468	9.6359	10.4398	11.1717	8.0527	6.2142	7.459	2.8725	9.139	4.1156	10.843	5.0275	6.3967	6.0518	9.5774	8.377	10.5161	7.5405	9.9674	5.3217	11.8967	4.3573	10.7985	10.5755	8.3493	6.1328	6.7188	11.374	8.949	12.0435	9.3805	8.6174	7.86	10.7361	10.2598	13.3628	0
TCGA-D5-5537-01	01	Tumor	8.5776	10.4255	14.2761	0	2.6878	9.0458	10.8903	2.4473	13.655	9.4923	9.2269	9.8005	11.7158	11.0448	7.493	6.9678	8.5682	2.1584	8.1526	2.7946	8.5813	7.1995	8.3317	5.6001	8.932	9.3149	9.7215	9.7713	10.5748	7.3251	9.6371	4.9398	9.9408	11.161	6.3162	7.2869	6.4771	10.9946	8.6505	11.9437	9.8164	9.7951	9.1118	10.3859	11.046	13.3017	1.7967
TCGA-CM-6677-01	01	Tumor	8.948	10.6069	13.5942	0	4.2175	7.8402	10.8108	2.5209	13.5591	8.475	9.3319	8.8477	11.9573	10.6724	7.9706	6.1986	8.7558	2.958	6.9007	1.8907	6.3737	5.4026	7.1617	3.1898	10.1442	8.8499	11.0206	8.8084	10.5475	7.7659	11.2661	4.7033	10.7213	11.6922	7.797	2.6116	5.8206	11.5818	9.5439	11.5729	9.203	9.8733	8.948	10.8185	10.684	13.7256	1.2352
TCGA-AD-6888-01	01	Tumor	9.2465	10.1533	14.2681	0.8013	2.7952	9.6507	11.2034	1.08	13.8051	9.599	10.0854	10.1166	12.106	10.8601	7.8061	6.6346	5.5673	3.8816	8.2177	3.8816	7.4555	6.5803	8.0479	3.3092	8.8419	9.6474	9.685	10.1818	9.9249	7.5124	10.0418	5.136	10.612	11.6645	6.3826	4.3614	9.1611	11.8714	9.2787	12.8575	9.726	10.6266	7.9255	7.8577	11.6511	13.4051	1.08
TCGA-AZ-4615-01	01	Tumor	10.1199	10.5279	14.4911	0	6.1441	7.4995	11.1791	1.7465	13.6886	8.4082	9.9981	8.5725	11.0993	10.4586	8.1067	6.6962	8.8045	5.4551	10.0996	2.6281	10.7945	6.566	9.9769	0	10.1083	8.8465	8.1311	7.8529	9.9976	7.6694	10.445	4.7246	11.4369	11.1159	8.4573	4.0664	5.9488	11.3495	9.7922	12.4761	9.6799	9.3183	8.5272	10.8675	10.8139	13.2216	3.0119
TCGA-AA-3662-01	01	Tumor	8.8351	10.2773	13.8821	0	5.5413	8.588	12.2306	1.0091	13.5071	9.4863	8.9634	8.3668	10.9972	11.6764	7.7663	6.6762	8.203	6.3217	8.7133	5.4271	7.8573	6.7928	9.521	4.8249	8.6923	8.4018	9.9114	8.4451	9.5029	7.4485	10.1899	3.7172	10.2943	11.0849	7.8478	5.5429	9.7324	11.5549	9.0949	11.6099	9.9362	9.6577	8.9096	10.0279	10.1318	13.1168	2.7158
TCGA-DM-A28C-01	01	Tumor	8.3516	10.1294	14.9777	0	1.4053	8.9852	10.8673	0	14.3145	9.1831	9.812	8.8448	11.9332	11.4703	8.1147	6.821	5.9154	0.4979	6.4248	0.5106	5.4139	5.2672	5.4139	6.0915	9.5867	9.1429	10.8637	8.074	10.5592	8.1082	9.6249	5.0147	10.1594	11.6613	4.5651	0.8965	1.9581	11.399	8.9591	11.3128	10.0526	9.4453	9.3291	8.8173	10.9902	13.489	0.4979
TCGA-NH-A8F7-06	06	Tumor	9.2086	11.18	14.317	0	2.4423	9.7859	10.6555	1.3855	13.339	9.0678	10.2107	9.3791	12.247	10.8215	7.5675	6.6738	5.8441	3.7972	8.1863	2.8172	6.2478	7.0666	7.688	1.1438	8.5881	8.7736	9.9879	9.9086	9.518	7.9267	7.7104	5.9794	11.324	11.2678	6.9955	0	5.173	11.7113	9.5486	12.2505	9.5595	10.4362	8.1803	6.9999	11.7202	12.8258	1.7736
TCGA-DM-A1DA-01	01	Tumor	8.947	11.0591	13.3212	0	2.8166	6.6659	11.5577	2.4474	13.6115	8.7772	9.3834	9.1351	12.2195	10.6704	8.4487	6.4779	7.0488	8.2935	8.4434	1.9499	10.839	5.8085	10.7321	5.2076	9.1334	9.4662	10.0284	10.1382	9.2526	7.2492	10.6743	5.2076	11.1983	11.1311	6.8798	0	8.8156	11.3595	9.1919	12.3933	8.9016	9.9976	8.2014	8.8958	10.1819	13.1519	0
TCGA-F4-6569-01	01	Tumor	8.8702	10.9145	14.5526	0	3.7806	8.3329	11.2114	6.4685	13.3816	8.3702	9.5374	8.441	10.3895	10.2264	7.9592	6.258	11.3611	6.1389	8.9102	5.2162	7.44	7.6286	9.9192	5.9311	9.3	8.7081	10.2505	8.6867	10.1903	6.3858	11.0076	4.9923	10.3488	11.2699	8.7067	5.3305	6.5904	11.2114	8.7264	11.693	10.215	8.9152	10.3922	12.1112	10.9268	12.9873	1.6113
TCGA-AA-3660-11	11	Normol	9.2693	10.5712	14.2107	0	4.5825	8.7828	10.5905	1.8283	13.7847	8.5479	10.2144	9.4459	11.1735	10.0607	8.7099	7.0483	9.2069	9.1153	10.517	10.6609	11.8318	10.5694	12.6478	6.5167	9.6871	9.0491	10.2793	7.5167	10.7427	8.4294	10.1637	2.271	10.8067	11.416	9.0491	7.8733	4.8611	11.9783	9.6383	11.8843	9.2619	9.0723	8.3723	8.0149	11.3365	13.43	1.1862
TCGA-CM-6674-01	01	Tumor	8.7926	10.6912	14.2279	0	4.2945	7.9877	10.9209	3.7458	13.7395	8.2998	11.214	9.2458	11.3895	10.4788	8.2482	6.565	9.5053	5.214	9.4175	7.5223	10.5037	7.5	9.4609	7.4636	9.9443	9.1095	10.436	9.1761	10.7557	6.624	10.117	5.5971	10.9402	11.2778	7.9552	4.2239	3.7458	11.3794	9.6501	12.9197	9.2565	9.3226	9.1601	10.6179	11.3184	13.3886	1.7037
TCGA-CK-4950-01	01	Tumor	9.9332	10.3505	14.2042	0	4.7615	7.7257	10.5896	1.5896	13.6691	8.2841	10.3103	9.1701	11.6633	10.3545	7.9017	6.2855	8.844	7.9803	10.2425	8.5969	11.7885	9.1876	11.3712	6.8228	9.8752	8.7959	10.3006	8.6789	10.437	7.6167	9.5906	5.2798	10.7377	11.5828	8.4177	5.7861	4.9609	12.1598	9.6782	12.3086	9.4581	9.9878	8.8844	10.2389	10.7976	13.8323	1.8795
TCGA-DM-A1D9-01	01	Tumor	8.2384	10.7072	14.1073	0	3.2138	8.3465	10.9598	0	13.8588	9.2175	9.6285	9.7364	11.7579	11.3277	8.0239	7.1637	7.2573	2.3143	8.0035	2.4072	9.3949	5.4501	7.3742	5.3482	8.9734	9.4444	10.9722	8.1084	10.694	6.933	9.4306	5.1871	10.5615	11.4585	6.1738	1.2891	4.7457	11.2908	9.423	12.1088	9.9885	9.0841	8.6186	9.1519	10.229	13.7108	1.409
TCGA-CA-6719-01	01	Tumor	8.307	11.3259	14.7672	0.5495	4.7278	7.3673	11.5399	2.2354	13.3457	8.8537	9.6499	8.4439	10.166	11.1587	7.5497	6.4079	10.5586	6.2322	8.6905	4.7775	9.9565	8.5261	9.8203	3.4243	9.438	8.7891	10.293	7.9415	10.3142	7.1725	10.8882	4.1065	10.3304	11.1063	8.0762	5.1023	5.9588	11.3499	8.8041	11.6149	9.8017	9.8842	10.0396	11.2985	10.6314	12.8649	1.7303
TCGA-CM-6675-01	01	Tumor	8.3847	10.6696	14.6855	0	3.8376	7.4011	10.5502	0.4884	13.3534	9.2271	10.4076	9.1506	10.6736	9.9201	6.5681	6.6851	7.4384	1.773	9.1939	4.765	9.1779	7.7984	7.4617	0	8.3079	9.2427	10.5205	9.2149	8.8339	6.6514	9.5187	4.583	10.8631	10.4747	6.3993	4.0807	8.217	10.8242	9.6619	12.3018	9.6175	9.1408	9.3029	10.4069	10.7779	11.6776	1.9338
TCGA-D5-6533-01	01	Tumor	9.3102	10.7718	14.1164	0	5.4399	8.5851	11.2904	1.7137	12.804	8.9597	10.071	9.3061	11.8349	11.3101	7.7006	6.1263	7.5044	3.0524	5.988	1.7137	5.3779	5.1187	4.266	1.7137	8.8814	8.5765	11.0545	9.4083	10.2675	7.4972	10.3091	5.9672	11.3353	11.9258	7.3677	6.2828	6.2611	11.5006	9.6842	10.9964	9.529	9.4335	9.4016	10.2944	11.1154	12.9786	1.4977
TCGA-A6-6782-01	01	Tumor	8.387	10.4316	14.2564	0	4.3814	9.4939	11.2052	4.7078	13.5001	8.9965	9.8124	9.9792	11.8749	11.1182	7.506	6.4757	10.7608	2.5485	7.7382	5.1089	7.4379	5.7287	7.6268	4.4986	8.3387	8.7468	10.1271	9.1439	10.4412	7.6332	10.9061	3.2292	10.4186	11.0657	7.6836	5.375	6.5139	11.8737	9.0786	11.8202	9.7686	10.093	9.1598	10.1144	11.0634	12.891	1.8661
TCGA-D5-5539-01	01	Tumor	7.4223	10.9714	15.5693	0.5556	3.8231	7.2986	9.3537	3.9158	14.3857	8.9021	10.4121	9.065	10.9898	10.2758	8.2049	6.4572	9.0291	7.7496	9.3818	7.5471	10.7346	9.033	10.8998	6.1207	8.655	8.4161	10.1467	8.4527	10.2505	7.7869	10.3115	4.8438	10.6728	11.0257	7.6143	5.8791	7.1152	11.7172	9.0826	12.8349	9.7287	9.1966	9.1402	10.593	11.5614	12.9758	0.9557
TCGA-CK-5912-01	01	Tumor	9.3089	10.6923	14.4961	0	3.1674	9.258	11.057	1.8053	13.3727	9.0127	9.2095	8.8045	12.0127	12.4048	8.2733	6.497	8.1341	1.8053	7.8109	3.8047	8.8109	6.415	6.641	4.3548	8.8363	8.1443	10.7499	9.7562	10.3884	6.3722	10.3275	5.264	11.0588	11.6806	7.1367	0	5.8798	10.1392	9.8045	11.6664	8.5498	9.1197	8.9396	9.6053	11.2112	12.5004	1.3202
TCGA-CM-4751-01	01	Tumor	8.9109	10.6077	13.7562	0	5.4731	8.3884	11.6462	2.7952	13.5935	8.971	8.99	9.2958	11.0404	10.4183	7.7258	6.5751	8.9973	6.1295	8.987	5.8948	8.2865	7.7382	10.019	4.461	8.9448	9.28	10.4889	8.3629	10.2269	7.8017	10.0126	5.5313	10.398	11.4826	7.5399	3.7347	9.0204	11.6928	9.2402	11.6049	10.2762	8.9639	8.6684	10.1685	10.5908	13.3244	3.7377
TCGA-AZ-4614-01	01	Tumor	7.8744	10.7264	14.1784	0	2.0936	7.4378	12.3246	0.4942	13.9629	9.1897	10.4964	9.9053	10.7163	9.873	8.0381	6.1384	7.0983	3.8962	8.2923	3.9352	10.0782	6.9004	8.6175	1.3973	7.8155	9.7721	9.757	8.7591	9.5628	7.1778	11.5475	5.3443	10.4352	10.0623	7.3025	6.2584	9.3208	12.1964	8.837	12.9306	10.0187	9.8059	9.5161	9.3012	10.6844	12.9629	1.6053
TCGA-A6-6140-01	01	Tumor	8.9743	10.5021	14.3384	0	3.7214	9.6662	11.4688	1.4549	13.5443	9.4907	9.7361	9.0402	12.133	10.5249	7.3053	6.0108	7.1459	5.1275	7.0778	5.2969	7.7669	6.6847	8.1518	0.556	8.4697	8.3895	10.6249	8.2502	10.5747	7.7436	9.5645	5.6369	10.7748	11.6368	7.2731	7.2186	3.5709	11.3064	9.0354	11.6829	10.0208	9.8039	9.3874	9.9877	11.1076	12.7789	1.2055
TCGA-NH-A6GC-01	01	Tumor	8.5733	10.9281	14.2327	0	4.0617	8.9889	10.7245	0	13.3528	9.96	8.1834	9.4324	10.8145	10.3634	7.9187	7.1681	7.1606	5.5641	9.7144	5.4128	10.9117	6.9106	9.3376	2.3	8.1792	9.3481	8.9911	9.6874	10.1823	8.3829	9.941	5.119	10.5088	10.301	7.2451	3.0421	6.0981	11.309	8.497	11.5595	10.535	9.5871	9.5818	11.7378	10.3212	12.175	8.6765
TCGA-AA-3495-01	01	Tumor	9.7379	10.5471	14.0855	0	4.0343	9.3603	12.1286	1.7672	13.5457	9.4834	10.2375	8.8046	11.2395	11.1385	8.4112	6.4418	8.0678	4.828	7.7478	3.4081	6.6235	6.9551	9.2473	1.9578	8.5134	8.4808	10.6916	9.2089	10.2598	7.2612	10.6369	5.933	10.7063	11.9239	8.1939	5.1657	8.4434	11.428	9.3294	12.1083	9.1903	9.235	8.992	9.9455	11.4903	13.1573	1.2882
TCGA-CM-4744-01	01	Tumor	8.4223	10.8563	12.8964	0	4.7284	8.5166	11.2801	0.8262	13.9825	8.5818	9.9673	9.7459	11.1318	10.4244	8.4998	7.0974	6.1488	8.0156	10.511	6.7762	11.7796	9.0172	11.7519	3.4144	9.3914	9.2944	10.681	8.2638	10.7359	7.4216	10.1291	5.8437	10.3366	11.0423	6.7608	3.7273	7.1347	12.0541	9.2484	12.1827	8.8795	9.4782	6.7608	8.6832	10.2291	13.3956	1.7307
TCGA-AD-6895-01	01	Tumor	7.8953	10.3986	14.5727	0	6.9952	6.598	10.7876	3.0151	13.534	9.0082	9.336	9.7475	10.5915	10.5439	8.0108	6.0585	9.1237	4.2794	8.1777	4.2439	10.768	5.1099	8.2489	3.3848	8.9786	8.9305	10.1951	9.1904	9.5982	7.4689	10.6772	1.9387	10.0413	10.2912	6.9014	6.7596	6.8432	11.4021	8.1564	12.6108	9.9416	9.1221	8.1396	10.4101	10.9824	13.209	2.7371
TCGA-AD-6889-01	01	Tumor	8.9531	10.6361	15.1544	0	4.0766	8.6853	10.8848	0	14.0436	9.3231	10.0547	9.5946	11.3962	10.4495	8.2166	6.3558	6.8414	3.8392	9.9192	2.6136	11.5057	6.1836	8.583	0	9.6444	9.7076	10.5637	8.9933	10.6513	7.3872	9.8123	4.5247	10.7515	11.2905	6.7822	2.5507	2.6136	11.6782	9.7129	12.6887	10.1506	9.5289	7.3872	10.0165	10.9673	13.5982	0.5965
TCGA-AD-5900-01	01	Tumor	8.9506	10.4279	14.1072	0	5.4092	8.1664	11.2184	3.0464	13.5412	8.3255	10.1778	8.9185	11.0049	10.0472	8.2126	6.643	10.0959	3.7493	9.3657	3.9073	11.3624	6.4446	8.8325	1.8453	9.7155	8.8777	10.5342	8.9765	10.3532	7.024	11.3891	4.4767	10.8444	11.1393	7.8008	5.3909	5.7384	11.5013	9.3428	12.5396	9.6785	9.455	8.5446	9.94	10.7285	13.8331	0.6028
TCGA-D5-6540-01	01	Tumor	9.5347	10.4094	14.6702	0	4.9333	6.249	11.3074	1.9315	13.604	8.7869	9.8129	9.309	10.5825	9.9483	7.4859	6.0981	8.6647	7.5809	9.3175	6.56	10.7032	7.7726	10.0153	6.8454	9.197	9.1947	10.2095	9.1421	9.7606	7.6633	9.7938	3.1659	10.5906	10.4193	7.3306	13.2912	5.5963	11.5417	7.9984	12.2227	10.2009	9.1746	9.0515	11.0122	10.7815	12.2588	2.3846
TCGA-AZ-5407-01	01	Tumor	8.8197	10.4679	15.2647	0	2.3411	8.1317	11.3607	2.3411	13.3707	8.9482	10.2552	8.7533	10.9355	10.3431	8.6958	7.0604	7.1398	7.1457	9.469	7.1634	11.5289	7.9021	10.784	5.8272	9.2647	8.6548	10.3079	7.6262	10.1872	7.9333	9.8485	4.7626	10.3046	11.7283	7.4868	2.7227	3.8443	11.9002	9.3195	12.7424	9.2006	9.1667	9.63	9.1395	11.0279	13.2726	1.4558
TCGA-A6-2685-11	11	Normol	8.6098	10.4184	14.5266	0	4.887	8.4083	10.509	1.1209	13.7509	8.5483	9.9737	9.3187	11.6387	10.4201	7.8534	6.3644	10.228	7.3184	9.2007	8.3558	11.3363	8.8131	10.5774	4.249	9.9949	8.8589	10.811	8.215	10.6218	9.2084	10.1195	4.7255	10.9699	11.6606	8.2373	7.6412	3.9163	12.2096	9.5443	12.027	9.3142	9.0719	8.7891	7.7204	11.295	13.6145	1.9035
TCGA-G4-6311-01	01	Tumor	8.7059	10.8305	14.1868	0	3.872	8.3684	11.376	2.2242	13.6419	8.7925	9.4313	9.372	11.294	11.533	7.2439	6.7762	8.7149	8.3546	9.1713	8.3313	9.7231	8.8556	10.9204	3.8193	8.1026	8.506	9.92	8.4133	9.6758	7.5285	11.2443	4.5258	10.2617	11.1412	7.4044	5.3627	6.0684	11.7379	9.205	12.0033	10.0001	9.8721	9.1674	10.9838	11.2186	12.9591	1.0351
TCGA-D5-6923-01	01	Tumor	8.313	10.4963	13.7785	0	4.539	8.2195	10.8181	3.3449	13.4717	9.396	9.6409	8.4326	11.416	11.6374	7.7057	6.1117	8.9225	2.3932	6.9275	2.9765	6.9733	5.1571	6.15	1.3983	9.4803	8.7676	10.416	9.0191	9.9651	7.5507	10.3496	5.2592	10.8932	11.2712	7.6433	3.8001	6.6505	11.4344	8.9108	11.5922	9.9651	9.2409	10.2492	12.4185	10.8428	13.4094	1.855
TCGA-DM-A1D7-01	01	Tumor	8.1998	10.575	14.0264	0.4317	2.5568	8.8867	10.9836	1.2603	13.6878	9.0937	9.9974	9.47	11.4901	10.8657	7.3872	6.76	6.811	5.1653	8.8092	5.5453	9.8104	7.9642	9.7327	5.2203	8.7877	9.1008	10.5601	9.7323	10.6889	8.0001	9.5298	4.3102	11.012	11.7096	6.9231	4.7592	4.4777	11.6842	9.7735	12.7431	9.7232	9.352	10.3796	9.3258	11.1635	13.9958	1.0332
TCGA-A6-5659-11	11	Normol	9.871	10.1914	14.4574	0	3.42	8.575	9.9689	5.6578	13.3625	8.3145	10.3969	8.8362	11.7114	11.1593	7.9846	6.4774	10.5255	9.195	11.1063	10.4364	12.0598	10.5905	12.4715	5.7122	9.8873	8.9453	10.7591	7.6656	10.4634	7.7833	10.4841	1.5562	10.8091	12.048	8.5969	6.3248	3.2829	11.6535	10.4544	12.3011	9.091	8.7397	9.0441	8.6912	11.4165	13.6151	1.5562
TCGA-AY-A71X-01	01	Tumor	8.2779	10.5211	15.0892	0	2.584	8.7375	10.8076	0.4692	13.6248	9.103	9.7103	9.3377	11.4895	10.8732	8.2527	7.1693	5.6494	4.2527	9.0026	4.1314	10.0693	6.936	9.1572	6.0264	9.1813	9.0515	9.3176	8.2715	10.3473	8.6366	8.2545	5.1377	10.1666	10.7239	6.438	2.5042	3.4584	11.6038	8.9419	12.1929	10.1934	9.5639	8.4158	7.9768	10.8921	12.9138	2.758
TCGA-AZ-6600-11	11	Normol	9.2217	10.2393	14.4174	0	4.6795	8.9437	10.7005	1.9254	13.6283	8.3813	10.0907	8.7659	11.9293	10.5201	7.5193	6.2584	10.4217	7.4	10.3224	8.4998	11.1029	9.0572	11.2557	5.1351	9.8603	9.1567	10.8184	7.8409	10.3671	8.2758	10.8082	4.5476	10.5767	11.7574	7.419	8.7829	4.153	12.0529	10.0025	11.7803	9.4091	9.3269	8.9239	8.6278	11.0711	13.4077	2.9479
TCGA-AA-3655-11	11	Normol	9.1884	10.6186	14.32	0	5.1748	9.1604	10.9495	4.8963	13.8343	8.3678	10.0865	9.3154	11.3604	10.1135	8.6155	7.3733	11.1851	11.4437	11.7864	11.9985	13.0757	11.4801	14.1781	6.6582	9.7774	9.2254	10.5423	7.4839	10.8243	8.0599	11.583	3.4911	10.6674	11.6607	8.9302	7.9829	5.3576	11.9656	9.4583	11.9104	9.3844	9.3114	8.9157	8.1117	11.2741	13.567	0.9823
TCGA-CA-5254-01	01	Tumor	8.546	10.065	14.5701	0	4.5686	8.9357	10.682	2.3694	13.7582	8.8895	9.3954	9.807	11.2149	10.174	7.8371	6.6333	8.8834	2.6562	9.0841	1.8686	7.9564	5.618	6.0643	0	8.6892	8.6449	10.2274	9.6988	10.6639	6.3386	10.8604	4.233	10.9557	10.4032	6.5517	7.4401	4.8596	10.8495	8.5533	11.5944	9.4385	8.9471	9.1051	9.6681	10.7862	13.3505	1.0952
TCGA-CM-5349-01	01	Tumor	7.8345	11.0353	14.1146	0	3.8075	9.0191	11.3087	5.0784	13.1116	9.4031	10.5635	9.1163	11.7715	11.4133	8.4101	6.3346	10.6168	7.2257	10.134	5.5825	10.333	8.963	11.1261	6.8479	8.9316	8.9249	9.5584	8.8091	10.624	7.0336	10.2644	5.8031	10.038	10.941	8.2317	8.9338	5.2808	11.4082	9.1089	12.3758	9.808	9.271	9.073	11.0462	11.2918	12.963	1.7054
TCGA-A6-2686-11	11	Normol	9.255	10.2795	14.6755	0.4838	4.6384	8.7051	10.5694	2.1972	13.7011	8.5249	10.1482	9.2149	11.7766	11.0988	8.1772	6.4071	10.3975	10.5719	11.1077	11.1813	12.4083	11.2362	13.3591	6.664	10.0682	9.1159	10.9054	7.9928	10.7739	8.7711	10.3739	4.5181	10.84	12.0315	8.583	7.2823	4.5674	12.2829	10.0247	12.2088	9.5292	9.0704	8.9468	8.3279	11.4602	13.7323	1.7615
TCGA-AZ-4682-01	01	Tumor	9.1304	10.9652	13.8974	0	2.917	9.0038	11.4483	1.3996	14.2527	8.8963	9.8829	9.6057	12.1948	11.0821	8.2598	7.0534	8.3072	5.2426	8.4081	6.6688	8.5939	6.909	9.3059	4.722	8.7099	9.1974	10.4851	8.9427	10.4205	7.3136	10.6131	5.7504	10.7377	11.7187	6.9041	3.6756	5.5631	11.5647	9.9022	12.717	8.8342	9.9696	9.9376	9.3581	10.9044	13.8487	0
TCGA-CM-5344-01	01	Tumor	7.983	10.9727	14.3114	0	3.0699	8.9387	11.3304	5.5351	13.4045	9.258	10.9906	9.527	11.6877	10.7017	7.5425	6.6242	9.9681	4.7088	6.7285	4.4729	7.8413	5.9691	7.0888	1.7932	8.755	8.8428	10.0074	7.7206	10.2257	8.0756	10.3088	3.7889	9.7979	10.2856	7.0356	3.5468	6.9518	12.0066	9.474	11.5345	9.641	9.8389	9.5819	11.1113	11.366	12.9411	0
TCGA-NH-A50T-01	01	Tumor	10.3607	10.7799	13.4948	0	2.9507	8.2977	10.9877	2.05	13.8308	9.3911	10.5309	9.2943	12.258	10.903	8.65	6.676	6.6398	0.5348	7.3878	0	5.8238	5.274	7.2585	3.5009	10.048	8.1686	10.8447	8.5786	11.0641	7.9635	9.896	5.5054	10.8163	12.1759	6.0458	1.2738	5.0962	11.758	9.244	11.8947	8.8301	9.2362	7.5726	9.4844	10.8415	13.8591	0.5348
TCGA-AY-6386-01	01	Tumor	10.066	10.6346	14.3215	0	3.7515	8.055	10.8811	2.3241	13.6163	8.8967	9.4553	8.9139	11.1395	10.6241	7.9601	5.7306	6.3739	2.941	8.0058	1.6899	6.4784	4.9875	7.5167	1.224	9.9131	8.4012	10.8773	8.8859	10.3348	7.6182	8.7801	3.6008	11.0332	11.9681	6.8948	1.5345	3.5468	11.9415	8.8857	12.2454	9.4805	9.339	8.8303	9.9111	10.8172	13.4959	0.5314
TCGA-CA-5255-01	01	Tumor	9.3251	9.8191	14.8686	0	2.7114	8.8488	11.0606	1.9164	14.0285	9.4447	10.1763	10.1037	11.512	11.2401	8.197	6.4686	7.1323	3.0381	9.9398	3.529	9.842	5.7914	7.6334	7.2046	9.3547	8.5699	10.4466	8.8867	10.2049	6.9239	11.2318	5.1	11.2625	11.7454	6.5237	0.6368	7.7119	11.4343	9.2442	12.4155	9.2243	9.2853	8.0446	8.7274	11.067	13.5671	0.6368
TCGA-AA-3662-11	11	Normol	8.6951	10.3703	14.4841	0	4.152	9.074	10.8288	4.278	13.6302	8.8504	9.5412	8.9326	11.0679	9.9929	8.6838	7.1302	10.515	9.4029	11.5044	10.6567	12.2268	10.7215	13.2834	6.9011	9.2989	9.0653	10.346	7.3761	10.5679	8.3523	11.0464	4.152	10.5576	11.2585	9.0027	9.497	5.9578	11.6654	9.1841	11.5618	9.6744	9.2913	9.1666	7.3942	11.1498	13.1845	1.6621
TCGA-DM-A1DB-01	01	Tumor	8.357	10.7801	13.9818	0	2.1509	9.5507	11.4804	2.9785	13.4574	9.7519	10.2467	9.1589	12.92	11.2072	8.8074	6.5663	6.575	6.5663	9.0413	6.1836	10.704	9.2809	10.8754	4.905	8.4284	9.1854	10.0829	9.3578	10.0403	8.1815	11.1859	5.6694	10.7542	11.4205	7.3258	0.7894	5.3826	11.4523	9.5446	12.5579	9.4221	10.4603	9.7726	8.141	11.3804	13.0494	1.8402
TCGA-DM-A28F-01	01	Tumor	8.2237	11.0075	15.1081	0	3.3306	8.7161	11.7337	0.4314	14.0606	9.6042	9.3132	9.4548	11.8888	10.6753	7.9807	6.8616	6.5711	1.2593	6.5552	1.0324	6.0928	4.6057	5.6775	1.4554	8.2749	9.2554	10.5136	8.699	10.1492	8.2733	10.7691	5.4549	10.0724	10.5515	6.9502	1.7086	5.4434	11.8517	9.675	12.3959	9.6915	10.1846	10.7762	9.4447	11.0803	12.7501	1.0324
TCGA-AA-A02Y-01	01	Tumor	8.7963	10.0443	14.2636	0	4.2493	8.7176	10.7951	0	14.4043	9.169	9.9543	9.7573	12.6401	10.7935	7.8621	6.2649	3.3838	4.3739	7.8806	3.3838	6.4609	5.8806	7.6959	3.6034	9.8099	9.162	10.2988	9.4056	10.4392	8.8019	10.0589	5.7828	10.9612	12.0054	6.104	3.202	5.0706	12.0466	9.3349	12.6592	9.1994	10.3098	6.7753	6.8891	11.0288	14.3008	2.2813
TCGA-D5-6932-01	01	Tumor	8.3094	10.9761	14.7225	0	3.189	10.0235	11.4943	4.2167	13.6911	8.6414	9.2616	9.3596	11.5004	11.3008	7.1699	6.9291	9.1057	4.443	8.463	4.145	6.864	6.0336	8.7973	5.6093	8.474	9.0758	10.3196	8.9658	10.5161	7.3562	9.9765	5.4095	10.2435	10.7201	7.138	2.5964	6.6474	12.1159	9.077	12.4466	9.7374	10.0217	8.9772	11.3776	10.6014	12.8047	1.4877
TCGA-AD-6899-01	01	Tumor	9.1326	10.4484	14.9269	0	6.0388	8.9223	11.2136	5.518	13.3992	9.5949	9.5203	9.4036	12.1626	11.074	6.9428	6.5804	10.1217	5.2206	8.147	4.6548	8.2159	7.1339	8.8452	4.7908	9.3249	9.1198	10.1874	8.8361	9.217	7.9883	11.2084	3.7873	10.5519	11.1644	8.365	4.4271	7.4182	11.7978	9.1363	12.2633	10.0201	10.0682	10.0285	11.6854	11.1066	12.8654	2.8882
TCGA-AY-6197-01	01	Tumor	9.4657	10.8061	13.9202	0	5.7258	8.381	11.1768	0.4945	13.3757	8.3614	9.5904	8.3122	11.2479	10.5466	8.3251	6.2752	7.0647	5.1433	9.0399	4.3374	9.8197	6.2676	9.8978	7.996	9.7433	8.3596	10.6327	9.0478	10.2768	8.2003	10.325	3.2608	11.0328	11.1617	7.2191	3.6885	3.4345	11.3517	8.9874	12.8381	8.9792	9.0041	8.799	10.9991	11.0428	13.1676	0.8621
TCGA-AA-3660-01	01	Tumor	8.663	10.4754	13.3346	1.2924	3.8118	7.8635	11.8459	3.5395	13.84	9.0973	9.4905	9.4602	11.3289	10.3683	7.6954	5.7062	7.7418	3.9978	7.1843	4.7336	7.1356	6.3433	8.3059	0.9754	8.5578	8.8208	10.121	9.7058	9.988	7.9364	10.3167	4.3104	10.42	10.7674	7.6785	4.2877	6.4587	11.36	9.2207	11.6653	10.2858	9.8632	9.1304	9.7609	10.8075	13.1175	1.963
TCGA-A6-5660-01	01	Tumor	8.8846	10.7345	14.6634	0	3.1263	8.2593	11.4017	3.7503	13.5427	9.6469	10.4772	9.0516	11.8219	11.4074	8.2204	6.5178	8.4379	1.4427	7.1487	1.6543	5.6917	5.8179	6.0508	0.5156	9.2549	8.9699	10.2568	8.325	10.2209	7.0209	11.0167	3.7035	11.0047	11.5344	7.266	1.4764	6.5446	11.0978	10.0438	12.1184	9.5551	9.5775	9.956	10.5693	11.4042	13.1402	1.1945
TCGA-D5-6541-01	01	Tumor	8.5893	10.6807	15.1263	0	5.2589	7.5091	11.2213	2.9418	13.2845	8.7155	9.7709	9.0122	11.8588	11.2657	8.828	7.615	9.6638	3.7723	6.9267	2.65	6.8274	5.6101	6.4343	1.2673	9.2558	8.8032	10.9116	8.4589	10.6835	6.6719	10.2142	4.6393	10.9171	11.7137	8.179	5.1381	5.7007	10.1111	9.4322	12.3817	9.1659	8.7403	10.4895	11.0299	11.896	13.464	1.2673
TCGA-CM-4747-01	01	Tumor	8.3558	10.6179	15.1142	0	3.4726	8.4261	11.2036	3.7555	14.1695	9.3443	10.0769	9.3642	11.0618	10.7822	7.729	7.2799	9.1241	3.806	6.4366	2.8586	6.1148	5.4048	6.3198	0.9723	8.2227	8.9735	10.0964	6.1934	10.7422	7.2113	10.8029	2.4139	10.0996	11.1717	6.4446	4.2015	4.8767	11.9757	8.8406	12.2397	10.3197	9.7504	8.9995	10.1259	10.8774	13.5185	0.9723
TCGA-AA-3511-01	01	Tumor	7.9625	10.6319	15.2523	0	3.4911	8.9396	11.3172	4.3369	13.6807	9.0744	9.6568	9.551	11.3471	11.0682	7.6917	6.2253	9.5127	3.4911	7.261	5.187	7.9476	6.3817	7.9575	2.3974	8.5861	8.6656	10.3897	8.7073	10.6342	7.2037	10.027	4.7106	10.526	11.3248	7.2928	3.0932	5.609	11.7694	9.0343	12.0263	9.784	9.4683	9.1109	10.8739	11.0723	13.1621	1.6481
TCGA-DM-A28H-01	01	Tumor	8.1028	11.1938	13.6779	2.3082	3.0891	7.9997	11.8937	0.4806	13.6557	9.8592	9.9335	9.6118	12.3	11.4895	8.7384	6.6329	7.2175	3.4953	7.0809	0	4.9923	4.8414	7.2175	5.475	8.8612	8.7101	11.0138	7.5029	10.8437	6.8778	11.0946	5.7956	11.0458	11.4343	6.9441	0.9057	6.365	11.5601	9.4751	12.6073	8.5382	10.0384	10.2832	9.3934	10.9873	13.5956	0.8404
TCGA-G4-6303-01	01	Tumor	8.2208	10.3825	14.5467	1.2489	4.3414	8.322	11.4546	3.4109	13.3721	9.3482	10.0076	8.6158	10.2767	11.1144	8.5149	6.7321	9.3159	1.2489	6.2153	2.8469	5.7363	5.3303	7.0153	4.1022	8.7348	8.4496	10.4469	8.3294	10.3167	8.1191	10.3452	4.6491	10.4962	10.9966	6.9685	5.6201	5.7548	11.3508	9.1493	11.4616	9.9484	10.0419	9.8873	10.3456	11.5948	12.8789	1.2489
TCGA-CM-5861-01	01	Tumor	9.2414	10.2215	14.816	0	4.4259	7.2502	10.6438	0.7712	14.5923	8.7805	10.0323	9.4082	10.7779	10.8723	7.646	6.7511	8.8243	3.245	8.9305	4.4259	10.1088	6.4926	8.5744	5.155	9.4785	8.9179	10.6236	9.0174	10.5329	6.8691	10.7071	3.702	10.8553	11.2942	6.7792	10.8128	7.7538	10.9963	8.8599	13.0451	9.3886	8.7263	9.1829	9.5885	10.9548	13.1302	0.7712
TCGA-AA-3525-11	11	Normol	10.0846	10.6971	14.117	0	5.9586	8.7568	10.6618	0	13.7226	8.433	9.9689	9.0894	11.6788	10.6312	8.2594	6.3299	8.9175	10.2469	11.3653	11.3312	12.6393	10.5561	13.1289	6.2908	10.0196	9.243	10.4483	8.251	10.5704	8.8736	10.0688	4.3827	10.936	11.6807	8.8554	7.4424	4.799	12.1148	9.4685	12.5484	9.579	9.1009	8.8335	8.3757	11.2012	13.5322	2.0774
TCGA-CM-6161-01	01	Tumor	9.9119	9.9202	14.2249	0	4.6179	7.9246	10.7724	2.8065	12.9589	9.2364	10.1552	9.1454	11.1743	11.319	8.4318	7.4851	8.9331	1.8358	6.8711	2.6181	5.6875	4.9128	5.2897	3.8355	9.6333	8.3086	10.69	8.1592	11.1118	7.8729	9.1	4.6179	10.4079	11.7261	6.9229	4.5646	5.7803	11.3019	9.0807	11.143	8.8895	8.4439	9.1509	9.8109	11.005	13.0925	2.4013
TCGA-NH-A50U-01	01	Tumor	8.6867	11.1157	14.0888	4.4951	2.9551	10.0606	11.6254	3.5772	13.4761	9.2189	9.4298	9.4101	12.0182	10.6931	7.9355	6.8143	9.1009	6.4194	7.5262	5.7044	9.7951	6.7819	9.3643	4.432	8.895	9.3664	10.3846	9.7027	10.0307	8.9654	10.6748	4.9651	10.4665	10.7435	7.817	0.4023	7.8516	11.1606	9.0021	12.5174	9.8215	9.7594	9.0528	10.3504	11.0024	13.4462	1.1932
TCGA-AZ-6607-01	01	Tumor	8.2996	10.1367	15.039	0	7.4716	8.5846	10.8867	4.1499	13.0517	9.1843	9.3876	8.8545	9.3916	11.3555	6.5778	6.5024	10.5958	5.6964	9.0232	6.7238	10.5447	7.6669	8.9021	3.3182	8.3873	8.377	9.8074	7.4444	9.6551	7.2905	12.52	3.4022	10.2345	10.4657	8.9201	9.4347	9.6647	11.1596	8.3133	10.9152	10.6959	8.6119	10.6343	12.9853	10.9143	12.8568	1.4827
TCGA-G4-6298-01	01	Tumor	8.2127	10.7193	14.7696	0	1.9199	8.9925	11.7404	0.6386	14.0456	9.7625	10.2641	9.5473	11.0556	11.3388	6.8681	6.3529	8.2448	4.0999	8.0342	3.2253	6.7005	5.5267	6.8333	3.6012	7.9587	9.4679	9.9174	8.6255	10.1515	7.8375	9.6439	5.9599	10.2366	11.2542	5.8528	3.2858	7.6503	12.0739	8.8913	12.0225	10.2485	9.4297	9.9438	10.3093	10.6607	13.5924	0
TCGA-D5-6538-01	01	Tumor	8.4996	10.6827	14.3171	0	0.9244	7.6782	11.8647	3.1828	13.2134	9.8141	10.3875	8.3783	11.0955	11.5455	8.4906	6.7997	8.5661	4.0629	8.6587	1.4832	7.9873	6.1041	9.4279	3.7138	8.4906	8.815	10.0014	9.8298	9.8987	7.1264	10.3092	5.8583	10.9577	11.2863	6.1953	2.9679	8.5609	11.7494	9.3936	11.4794	8.9468	9.4976	9.1221	9.5091	11.367	13.1594	0.535
TCGA-CM-6679-01	01	Tumor	7.9544	10.7532	14.9975	0.4799	3.4417	9.8726	11.0345	5.7727	13.0791	9.3129	9.2617	9.311	11.4632	11.247	7.1243	6.9412	10.2344	1.7518	7.4932	3.2153	6.8852	7.0141	6.1785	1.7518	7.9544	9.1318	9.8841	7.8828	10.5102	7.4677	10.3013	5.619	9.7681	11.031	7.4868	2.6399	5.9672	10.9522	9.0145	11.6971	10.3588	9.7773	10.0463	11.4127	11.255	12.4433	1.572
TCGA-AZ-4323-01	01	Tumor	9.1006	11.6183	13.6089	0	4.3625	9.4199	10.6389	3.8122	13.4698	9.0238	10.6113	9.4523	10.5357	10.8206	7.1189	6.7321	11.1883	5.4145	9.0304	6.5366	9.8917	8.1216	9.5091	7.1801	8.8771	8.811	9.708	9.2721	10.4549	5.1949	11.3409	4.0049	9.7684	10.3079	7.7195	6.5817	8.5751	11.0314	8.3428	11.6049	11.1229	9.2533	10.3198	10.4763	10.7136	12.44	7.2767
TCGA-G4-6322-01	01	Tumor	9.2397	10.5406	15.1037	0	4.5612	8.5869	11.0872	2.7338	13.7335	9.0213	10.3383	9.8332	11.4578	10.184	7.7881	6.8283	8.061	4.9101	8.9889	1.3868	4.5612	5.2224	8.0783	0	9.4069	9.3339	10.1953	10.677	10.2409	8.5298	7.5571	5.3984	11.0087	11.1285	7.3298	5.56	6.0086	11.8171	9.3888	11.835	9.8778	9.4591	8.9552	10.9052	11.2531	12.9215	1.1448
TCGA-CM-5864-01	01	Tumor	8.4418	10.423	14.6642	0	3.4877	8.1892	11.2611	1.2403	13.4978	9.2296	10.1326	9.4719	12.0903	11.9034	8.8983	7.0186	7.583	4.1723	8.2486	2.9657	8.0515	5.7943	9.4025	5.7765	9.1352	8.9959	10.3451	8.6134	10.4173	6.6795	11.0551	3.8703	10.7779	11.7415	7.0569	3.3586	4.5533	11.1068	9.4112	12.0319	8.7093	9.9211	8.4973	9.5074	10.9825	13.5479	1.2403
TCGA-CK-6747-01	01	Tumor	9.0989	10.8652	14.7459	0	3.673	8.1967	10.7489	3.2401	13.5372	8.2793	9.8906	8.8869	11.0437	9.5648	8.0841	6.3082	8.662	5.7423	8.5104	5.2518	10.2253	6.5078	9.8439	6.3347	9.9892	8.7909	10.8922	7.7956	10.7582	7.3681	9.0795	4.7395	10.7649	11.452	7.5851	2.0083	5.5062	11.3159	8.9874	12.783	9.5085	9.3246	8.8847	10.4521	11.0637	13.3124	1.3042
TCGA-CM-6163-01	01	Tumor	8.3014	10.4485	14.1293	0.4892	4.6795	8.377	10.5844	1.3867	13.9067	8.7589	9.8041	9.3065	11.7859	11.0449	7.3042	6.9769	8.4353	4.459	7.7933	5.4258	7.8873	7.3115	8.8953	6.0878	9.1716	8.1249	10.1428	8.0843	10.3868	7.165	11.1235	4.511	10.6724	11.9288	8.0389	6.8188	6.179	11.8521	9.3527	11.4392	9.2607	9.9081	9.4797	9.2606	11.2059	12.8595	3.1161
TCGA-AA-3713-01	01	Tumor	9.3756	10.5619	14.387	0	6.1473	7.768	11.2865	2.1618	13.4787	8.5743	9.7409	8.5347	11.2007	10.6282	8.1692	6.6574	8.5541	5.6447	7.3771	5.2935	8.1018	6.7069	8.6789	1.551	9.8355	8.3004	10.8234	6.5939	10.4273	7.5535	9.9265	2.8434	10.9386	10.9991	7.9858	5.2326	2.8434	11.448	9.2449	11.0156	9.5335	8.7851	8.3318	9.739	10.7503	13.1381	1.551
TCGA-A6-A56B-01	01	Tumor	8.0036	11.2762	14.0911	1.1303	2.5251	8.9566	11.0886	4.0407	12.766	9.4635	9.6557	8.4585	10.0144	11.7173	7.2925	6.2235	8.6962	1.1303	6.355	0	5.2872	5.0999	3.394	2.1913	9.3684	9.5139	10.265	8.4872	9.922	7.8486	9.7672	0	10.6203	10.6312	6.9058	4.5668	2.5251	11.8515	9.0241	12.1846	10.1322	9.8357	10.7203	11.0506	10.7735	12.501	1.1303
TCGA-CM-5348-01	01	Tumor	7.774	10.8371	14.4412	0	5.1805	7.6347	11.546	4.2833	14.0015	10.2815	9.3157	8.7455	9.8856	11.2012	7.6347	5.8072	10.8087	4.8434	8.0061	3.7197	5.6831	7.0579	7.7002	1.4219	8.5117	8.8211	9.7311	9.043	9.7884	7.1631	10.814	2.594	10.8662	10.6552	9.0104	7.4676	8.7069	10.9846	9.6399	11.0839	10.0107	8.7615	10.0271	10.6329	10.9397	12.575	2.1238
TCGA-AY-5543-01	01	Tumor	8.6182	10.7187	14.7582	0	5.6857	8.9789	10.6165	0	13.6526	9.5588	10.0354	10.2581	11.8218	11.3211	7.1313	6.9766	6.4682	2.8697	7.0818	2.9455	6.7264	5.6062	6.884	1.9108	8.7202	8.4975	10.7821	8.257	11.0574	6.298	9.0439	5.3374	11.3311	11.8632	7.1232	3.8428	5.3653	11.4245	9.5034	13.3046	8.7667	9.0989	10.6869	9.1225	10.7064	13.2924	1.3659
TCGA-CM-6169-01	01	Tumor	8.8118	10.3935	14.4664	0	6.0819	8.7984	11.0252	4.3052	12.7519	8.2916	9.9887	8.536	11.5527	11.7226	7.6821	6.8672	10.355	5.0127	7.9305	3.7563	7.8283	6.452	7.8867	1.0305	8.3866	8.4781	10.2807	7.2227	9.923	5.7597	10.8621	2.6355	10.1318	10.9292	8.568	3.5521	6.9179	11.0986	9.5238	11.6584	9.532	9.6023	9.7984	10.4855	11.3097	12.6629	2.3704
TCGA-AZ-6606-01	01	Tumor	7.8849	10.3938	13.9727	0	4.6744	7.3318	10.4118	0.8732	14.1721	8.3462	9.3529	9.4183	11.4708	10.4703	7.8437	6.5946	6.8603	2.4788	6.5696	3.4011	7.3355	4.8511	6.1213	1.1683	9.5199	8.3984	10.6056	8.7067	10.1845	7.4803	7.487	4.8511	10.6479	11.3785	5.888	0.9215	7.8696	11.7149	9.8803	12.1812	9.3446	8.9923	8.3496	9.5721	10.8463	13.2333	2.7702
TCGA-RU-A8FL-01	01	Tumor	8.9817	10.6686	14.3944	3.5166	0	8.9463	12.6353	0.5401	14.1271	9.1985	9.5368	9.9672	12.2285	11.0994	9.0697	6.9302	5.0939	5.4341	8.5215	0	10.5146	7.7566	10.7519	5.7943	8.633	8.8402	10.515	8.798	10.4216	8.0316	7.3578	5.6711	10.4014	11.1011	7.012	0	3.0472	11.718	9.3249	12.4178	9.3412	8.7951	8.154	7.4912	11.0069	12.9398	0
TCGA-CM-6678-01	01	Tumor	8.2223	10.3644	14.7471	0.5213	2.0165	8.1334	10.7695	2.7349	13.8094	8.8137	10.5506	9.7921	12.3061	10.9596	8.2473	6.6595	8.3926	1.6671	7.4373	2.42	7.7044	5.698	6.961	3.4606	9.7577	8.6949	10.2018	7.841	10.1942	7.4766	10.8479	5.2141	10.1324	11.591	6.2858	2.0773	6.1061	11.9285	9.4785	12.0387	9.5455	10.4583	8.8553	10.4029	11.1759	13.7992	1.2051
TCGA-A6-6649-01	01	Tumor	8.5921	10.0681	14.3926	0	4.8291	7.7373	11.0312	4.9531	13.902	9.8536	9.7592	8.5754	10.5836	10.7441	7.8433	5.9136	10.3698	5.3527	8.8361	6.4499	9.9751	7.0762	9.1368	5.9521	8.8571	8.5412	9.9442	9.2248	9.9414	7.6891	10.4905	2.6829	11.017	10.6519	7.2312	6.7178	8.5325	11.6995	8.4269	11.2818	9.8386	9.191	9.1968	10.9887	10.6881	12.8991	1.5427
TCGA-AA-3517-11	11	Normol	9.5072	10.6687	14.4441	0	4.9186	9.0315	10.76	1.0144	13.5935	8.3548	9.4685	9.1759	11.4791	10.7298	7.8209	6.8314	10.033	9.9376	10.6416	10.4346	12.2284	10.7246	12.819	3.0843	9.7691	9.2012	10.3705	8.1011	10.3719	8.7245	10.3664	2.8321	10.6855	11.4618	8.6714	8.0164	4.5719	12.1236	9.8404	12.2351	9.5679	9.2432	8.7487	7.9072	11.2293	13.4013	1.6042
TCGA-AA-3675-01	01	Tumor	9.5942	10.3352	14.7693	0	3.6628	9.2903	10.7301	2.9705	14.3455	8.6047	9.9653	9.0109	11.5508	11.4596	8.4943	6.897	7.5363	2.9705	7.446	2.5428	7.0891	5.4207	7.2579	3.0427	9.735	8.8617	10.8354	8.5484	10.5899	7.5642	10.0598	4.8254	10.5397	11.468	6.3407	2.3762	5.1038	11.4351	8.943	11.9006	9.4162	9.2113	8.8238	9.8432	10.6332	13.7541	0.4878
TCGA-A6-5665-01	01	Tumor	9.7218	10.7671	13.4125	0	4.9332	7.4163	10.4882	0.5549	13.7588	8.542	10.8765	9.5145	11.2783	10.4438	7.939	6.6967	6.138	7.0119	9.6951	7.6865	11.9865	8.5025	10.5897	8.2143	9.9276	8.5394	10.9964	9.3217	10.7543	7.2305	10.0923	4.7692	10.8265	11.4445	7.3638	2.6641	8.0656	11.1615	9.1947	11.3525	9.8066	8.9537	7.8654	8.6993	10.9247	14.0938	2.5087
TCGA-DM-A0XF-01	01	Tumor	9.2517	10.3728	14.3943	0	2.7006	9.016	12.0988	1.5565	13.5762	9.9995	10.1312	10.3296	11.409	10.8054	8.3834	6.7115	7.6226	5.0458	7.9722	6.6579	10.0639	7.8048	9.2456	7.4384	8.9988	9.3736	10.7343	8.8801	10.9683	6.0801	9.9576	6.2306	10.3084	11.1967	6.7648	3.1979	5.3731	11.2965	9.5595	13.019	9.7357	9.1795	9.7751	9.6621	11.4641	13.438	1.198
TCGA-F4-6855-01	01	Tumor	7.5103	10.6433	14.6084	0	4.118	8.0769	10.4907	7.3803	13.4334	9.4131	9.5997	8.7777	11.2912	10.9672	7.2683	6.8686	9.6204	0	7.0145	4.8325	8.1976	5.9815	5.2841	2.3008	9.2458	8.8654	9.9815	7.9211	10.3648	7.1669	10.6237	4.7646	9.975	11.3262	7.8543	3.9698	5.8889	11.2062	8.4399	11.3459	9.6758	9.4888	9.8403	11.5116	11.111	12.9224	0.7265
TCGA-AA-3496-11	11	Normol	9.0746	10.2932	14.4691	0.8061	4.9161	8.8379	10.576	4.0634	13.4191	8.2859	10.1738	9.1863	11.2853	10.7807	8.1187	6.9426	13.3692	10.3439	10.9459	10.5365	12.7867	10.5738	13.3604	4.4567	9.5426	9.2011	10.3538	8.0028	10.8775	6.9249	12.7396	4.2452	10.3727	11.7221	8.5942	8.1015	4.1871	11.3685	9.5483	12.1781	9.8065	9.0905	9.4683	9.1601	11.0668	13.3772	1.3202
TCGA-QG-A5Z2-01	01	Tumor	9.4126	10.7019	14.6176	0	4.8116	8.475	10.5458	1.2457	13.2873	8.8984	9.7471	8.6806	10.7598	10.6858	8.3227	6.7816	6.4995	3.7744	7.927	5.7121	10.507	6.1203	8.5349	4.1537	9.4356	8.9503	9.6883	8.2484	9.8849	8.1679	9.564	3.4058	10.5416	11.0089	7.3163	2.4029	4.0076	11.0919	8.9563	12.2725	10.0475	9.0767	8.4971	8.4749	10.9701	13.1438	3.0355
TCGA-AA-3489-01	01	Tumor	9.4871	10.8628	14.5132	0	6.0581	8.4276	10.6833	5.8366	13.3332	9.2868	9.5478	8.6442	10.9793	11.0541	6.7393	6.5707	11.3024	3.9104	8.2556	5.0385	8.1382	6.0744	7.5283	4.0818	8.5553	8.8515	10.066	8.6344	10.0403	7.5978	11.3613	4.935	10.6943	11.1463	8.517	6.4958	5.4043	11.0806	8.6483	11.5576	9.8151	9.1817	10.0757	11.0191	10.7223	12.7466	3.4414
TCGA-A6-5662-01	01	Tumor	7.9753	10.635	14.5315	1.662	3.0634	10.0378	11.5411	2.5265	13.571	9.0814	9.9287	9.6133	10.6251	12.0999	7.6165	6.7649	9.4362	2.4139	7.8883	5.9039	7.6386	7.3011	8.7655	5.6034	8.9346	8.6334	10.2419	8.6229	11.0378	6.6458	10.6144	4.6578	10.3304	10.7659	6.3869	4.6961	7.2972	11.4639	9.7334	12.6573	9.1794	9.3987	8.7453	9.9015	11.2215	12.1523	0.5189
TCGA-DM-A1D6-01	01	Tumor	7.7932	10.7553	13.486	0	2.3883	7.9096	10.131	1.4299	13.8763	9.6945	10.312	9.3963	11.2317	10.4352	8.681	6.0242	6.2818	2.9592	8.5545	4.1878	9.7711	6.156	7.8259	2.7328	9.1038	7.9855	9.2345	9.9677	10.3579	7.4761	9.7818	5.7344	10.5608	11.3628	6.7438	1.1264	3.0106	11.4056	8.0848	11.3016	10.0213	9.3854	8.5856	8.6253	10.2548	13.27	0.3588
TCGA-AY-A69D-01	01	Tumor	10.7235	10.8108	14.3648	0	4.1158	8.5764	10.3485	1.4729	13.7659	8.6281	9.3203	9.6292	11.9402	10.5522	7.2372	6.3941	7.9345	1.2754	5.7809	1.6466	4.843	4.4329	4.3846	0	9.4822	8.1856	10.6839	9.646	11.0504	8.4835	8.6812	4.843	10.4869	11.7226	6.2195	3.7675	2.8151	11.1349	9.1672	11.4626	9.9205	9.155	8.9678	10.2612	10.7033	13.3321	3.2515
TCGA-D5-6898-01	01	Tumor	9.2226	10.0972	15.1227	0	5.2435	8.1623	12.3689	3.5018	13.118	9.4221	10.1456	8.8961	12.2259	11.3037	8.2748	6.2793	10.0643	3.8725	7.126	3.4046	8.481	6.3858	8.8917	4.6844	9.1654	8.59	10.925	8.8118	10.455	8.1189	10.7808	5.5235	10.0116	11.5908	7.3994	4.6842	5.7967	11.3678	8.9584	12.2119	9.3826	9.1976	10.2816	10.4131	11.2254	13.326	1.8407
TCGA-D5-6530-01	01	Tumor	8.7167	10.5378	14.5051	0	6.0957	8.0505	10.8075	0	13.4273	8.5301	10.0389	8.0585	10.6173	9.8834	8.152	6.6736	6.8326	5.2911	8.6182	6.4218	11.1968	6.7286	8.8788	5.0318	9.3179	9.0718	9.5116	8.8081	9.8984	7.3794	9.554	4.7424	10.5934	10.8754	8.1744	3.6565	5.4792	11.7434	8.8183	11.7504	10.0837	9.3437	8.9148	9.4142	11.2076	13.0086	2.7962
TCGA-DM-A28A-01	01	Tumor	8.8893	11.0232	14.2402	0.508	3.9795	8.9123	10.9375	1.6372	13.6532	9.3358	10.3227	9.1644	11.5067	12.2845	7.7624	6.6222	8.3748	5.5288	9.0611	3.9795	9.3373	6.7408	9.1581	3.3022	8.8397	8.825	10.3162	8.4614	10.56	8.5146	9.6085	5.7822	11.432	11.1012	7.1793	5.1213	9.2257	11.5211	9.1549	11.902	10.1129	9.4057	9.6711	11.2039	11.0292	12.8407	2.1299
TCGA-D5-6532-01	01	Tumor	8.888	10.7952	14.6127	4.7029	2.3087	9.8818	11.2029	1.8624	13.6965	8.6488	11.0207	9.051	12.478	12.1835	8.0949	6.4665	7.2493	1.4634	6.0922	1.4634	4.727	5.0088	6.3778	5.1933	8.6309	8.2714	10.7101	8.4203	10.2597	5.9456	10.2787	5.9862	11.0944	11.3595	6.6354	0.5255	7.6661	11.237	9.7326	12.1531	9.2557	10.3924	8.2	9.2975	12.0513	13.1302	0.5255
TCGA-F4-6703-01	01	Tumor	8.7181	10.8462	14.3511	0.4659	7.7601	7.5055	10.672	4.3536	13.5625	7.7791	9.3876	9.0178	10.4119	10.5909	6.9778	6.3468	11.5352	4.6882	10.0489	6.7258	9.3947	7.4749	7.7345	5.0784	8.6744	8.3327	9.9562	8.1865	10.1375	6.0976	12.0734	4.6667	11.2844	10.6037	9.8082	9.4782	6.5549	11.3909	8.533	11.1669	10.1444	9.1626	10.2015	11.9587	10.6471	13.0981	3.2307
TCGA-DM-A1D0-01	01	Tumor	7.5252	10.7595	14.5036	0	1.5843	9.0453	11.8249	1.8738	13.8913	9.5812	10.3142	9.9863	11.627	10.4509	8.1505	6.4802	6.0214	0.9995	8.1093	1.2218	5.4141	6.321	6.4028	2.7362	8.7052	8.4707	9.3835	9.8136	10.5559	8.0233	9.3646	5.2596	10.6076	11.2146	6.442	1.6516	3.2215	12.3272	8.5498	12.9844	9.3478	9.4727	8.2085	7.4056	12.1018	12.988	0
TCGA-D5-6929-01	01	Tumor	9.3895	10.9008	14.2916	0	3.5409	9.4047	11.3763	1.7503	13.1403	9.6251	9.7183	9.182	12.1244	11.2557	7.9683	6.7065	9.4197	3.6805	7.6367	4.3579	8.025	6.388	6.6651	1.4716	9.0515	9.2564	10.3207	8.7813	10.375	7.6108	10.2643	5.4251	10.8477	11.1835	7.6195	6.8517	6.5963	11.6812	9.509	11.6592	9.4407	9.9327	9.9311	10.8637	11.2004	12.7616	1.4716
TCGA-F4-6704-01	01	Tumor	9.2906	11.2276	14.3372	0	3.8789	8.464	10.6938	6.8872	13.5944	8.8829	9.2509	9.5001	10.4729	10.5992	8.0563	5.9443	11.9719	4.7866	10.0357	4.3936	10.3679	7.5881	8.844	2.7568	9.5968	9.3354	10.0183	10.2599	10.6774	5.8384	11.1721	5.6699	11.0195	11.0588	7.8977	4.8611	6.6596	11.3646	8.43	12.2108	10.1678	9.2349	10.3931	12.0308	10.2656	12.7289	2.0059
TCGA-D5-7000-01	01	Tumor	9.6979	10.2121	14.3635	0	5.5139	8.156	11.0002	3.0787	13.4434	8.8253	9.5016	9.209	11.9296	11.2141	8.0166	6.4066	9.1849	3.0102	7.0002	3.9178	9.8546	5.1011	7.1511	2.9382	9.6966	8.3313	10.5347	8.6157	10.0309	7.3583	11.0605	5.644	10.6727	11.6898	7.3958	2.8625	5.5384	11.1966	9.1673	12.0839	9.6774	9.8912	8.9443	10.9957	10.8	13.5404	2.6979
TCGA-AZ-6601-01	01	Tumor	8.819	10.8287	13.5815	0	5.5927	8.2235	10.8154	2.3839	13.418	8.9066	9.7837	8.7599	10.6882	10.3398	8.1439	6.965	9.411	3.8996	8.4122	3.4759	8.0597	5.9875	6.6339	2.4961	9.5907	9.1468	10.5889	6.8981	10.3213	7.3895	10.4908	4.5973	10.6341	10.6599	8.444	5.0727	6.4372	11.2941	8.8576	11.5901	9.5835	9.2207	8.5056	9.9476	10.6486	13.0452	2.7881
TCGA-AZ-4684-01	01	Tumor	9.0278	10.4126	14.1163	0	3.9747	7.9344	11.9109	2.9352	13.9319	8.6153	10.1759	8.8387	11.2647	10.3974	6.9815	5.9366	7.8714	8.2067	8.9384	10.2505	11.6233	9.8966	11.8373	7.7074	9.1808	9.0819	11.1763	8.4208	10.4566	6.8688	9.9776	5.5419	10.8998	11.7846	8.1451	3.9514	6.9815	11.379	9.7634	12.0627	9.4994	9.1119	9.858	10.6523	10.7139	13.3281	1.2778
TCGA-G4-6317-02	02	Tumor	8.557	10.6394	14.9358	0	1.4085	10.0707	11.7676	0	13.6937	9.7599	9.6689	10.0279	11.6945	11.2608	7.2067	6.3878	7.2387	0	6.6479	1.9099	5.2876	5.6779	5.4236	1.4085	8.9471	9.1512	10.2474	9.1075	11.0881	9.1899	10.3014	4.3438	10.0165	10.7827	7.0046	3.8789	6.3878	11.7514	10.0195	12.129	9.5875	9.746	8.5292	10.024	11.0461	12.579	0.6338
TCGA-AA-3697-11	11	Normol	9.2124	10.4892	14.1876	0	5.7499	7.995	10.463	2.1581	14.0073	8.2295	9.7928	9.3575	11.5064	10.0461	7.8153	6.2358	10.7215	10.0972	10.3468	10.6036	12.0326	9.992	12.6674	6.9023	9.655	9.1301	10.9144	8.6338	10.6467	7.6999	10.9292	3.5096	10.8988	11.6998	8.6112	8.3878	4.195	12.011	9.3383	12.5364	8.9922	9.4719	9.0813	8.9611	11.2402	13.7371	1.662
TCGA-CM-6165-01	01	Tumor	8.9335	10.1314	14.7211	0.5776	3.8373	8.0413	10.5723	4.149	13.1817	8.7827	9.8419	9.0706	11.7718	11.2402	8.5703	6.7896	9.4856	2.7884	7.5015	3.3723	8.68	6.5927	7.7328	3.8862	9.4546	8.6503	10.7057	8.8232	10.652	7.2068	10.3621	3.7868	10.8843	11.7912	7.8997	4.6136	4.5334	11.3174	9.4566	11.6691	9.2828	9.0502	9.4935	10.17	11.4131	13.2038	1.3087
TCGA-AZ-5403-01	01	Tumor	8.8744	10.3483	14.5718	0	2.9027	8.8558	11.1305	7.1179	13.5393	8.7454	10.4746	9.1423	11.3769	10.9979	8.3419	6.9004	9.2537	4.3853	7.9028	4.1423	7.2813	6.5261	7.7745	0.5486	9.8513	9.1173	10.8746	8.0032	10.7173	6.0192	10.4841	4.6998	10.6803	11.8823	7.7987	2.0838	7.1558	11.2357	10.3514	12.3049	8.85	9.2419	9.9184	10.7322	11.1158	13.2189	1.2559
TCGA-AY-A8YK-01	01	Tumor	7.7425	10.3338	14.4637	0.9477	2.6108	10.0527	10.325	2.3728	13.5018	9.5617	9.6891	10.0388	12.5093	11.0765	7.9327	6.0946	7.6555	3.5461	7.1421	3.9003	7.7109	6.2077	7.5628	2.0877	9.1615	8.5303	10.4471	8.8188	9.8615	8.1154	10.7898	5.6503	10.8201	11.1339	7.0938	3.7728	3.4876	11.7763	9.4346	11.9054	10.0559	10.3184	9.558	9.7722	11.4422	12.8205	1.2589
TCGA-AZ-6603-11	11	Normol	8.1979	10.4071	14.4081	0	5.9554	8.4682	10.6937	4.2399	13.4547	8.3797	9.4618	8.8666	10.8512	9.8454	7.7879	6.8743	13.1268	8.5856	10.2237	8.6737	11.7306	9.2686	12.0185	4.0235	9.2173	9.121	10.23	8.6069	10.4132	6.7457	12.6079	3.8235	10.711	11.1095	8.5915	9.5158	4.4629	11.4436	8.5063	12.1476	9.9687	9.2331	10.0469	9.4115	10.8937	12.9533	3.2359
TCGA-A6-6653-01	01	Tumor	9.8696	10.3227	14.0545	0	4.0999	6.8835	10.6529	1.3299	13.9188	8.1728	10.2261	9.0439	11.2304	10.0293	6.8649	5.3348	7.7377	7.0465	9.2251	2.0099	9.6616	6.4888	9.5269	0	9.6821	9.1178	10.5378	8.6216	9.8294	6.613	9.8595	4.9901	11.0796	11.0069	7.5328	4.4828	7.4268	11.8847	9.6865	12.1795	10.1165	9.5145	10.0321	11.5116	10.4246	13.3783	2.0099
TCGA-G4-6586-01	01	Tumor	9.3595	10.1458	13.9285	0	5.1128	8.2653	10.7437	0	13.9039	8.3139	10.2718	9.8141	11.3255	10.2885	7.7132	6.2043	6.5763	4.332	8.9742	4.6579	10.5694	6.8239	9.0044	4.4207	9.4037	9.865	9.506	9.0003	10.4044	7.6596	9.4279	5.7707	10.4918	10.9999	7.1691	2.4256	7.9549	12.0038	9.5034	12.3167	9.3716	9.5671	8.6407	8.4521	11.1171	13.2066	2.8837
TCGA-AA-A01P-01	01	Tumor	8.6143	10.6287	14.3943	0	7.1659	7.4134	10.7057	2.9697	13.6076	8.6594	9.5607	9.2859	10.7209	10.2074	7.6929	6.9436	9.8574	5.9867	8.6734	6.0073	10.6439	7.1841	8.8646	1.2429	9.5664	9.2202	10.2415	9.2539	9.9842	6.7496	10.6896	5.1912	10.5187	10.7007	8.0312	11.5566	4.8011	11.1995	8.2819	11.9784	9.5811	9.2225	8.9429	10.7203	10.5988	12.8466	4.2986
TCGA-AA-3502-01	01	Tumor	8.9589	10.4468	14.689	0	3.3475	6.8933	11.3484	1.2924	13.589	9.2836	10.469	8.4464	10.6465	9.7626	8.0747	7.4726	6.0064	5.2185	9.7342	6.0279	10.7309	7.295	9.8208	4.0408	9.3211	8.7514	10.0212	8.3069	10.223	7.9364	9.1027	5.3092	10.4251	11.3803	7.5129	2.1315	4.8101	11.5827	9.6122	11.7569	9.7128	9.4495	8.644	7.887	10.8422	13.2271	1.7721
TCGA-AA-3697-01	01	Tumor	9.3848	10.7486	14.2697	0	4.6524	8.7085	11.2113	1.5148	13.5531	9.1091	10.0023	8.2989	11.1775	11.4625	7.0338	6.581	7.7077	5.9322	7.6241	6.1109	8.137	6.3486	8.9408	0.6953	8.8889	8.7589	10.4043	8.8734	9.8968	8.5767	9.563	5.2301	10.662	11.2145	7.6511	5.2332	4.0426	11.7124	9.2881	11.8075	9.066	9.8173	8.841	10.3587	10.8002	13.4162	0.6953
TCGA-AD-6890-01	01	Tumor	8.512	11.0882	13.2884	0	4.1811	8.9237	10.9592	1.9837	13.1009	9.2261	10.1034	9.6246	11.6929	10.2104	7.8804	6.3544	7.9476	5.405	8.8989	3.9796	9.1582	7.4972	9.3753	4.3988	9.1994	9.0816	10.0467	8.9163	10.2991	8.4254	8.3226	4.7551	10.3522	11.4781	6.8537	2.7626	5.6624	11.9988	8.6308	11.7791	9.2023	9.9733	8.7933	10.0166	10.9967	13.3228	2.5181
TCGA-AZ-4315-01	01	Tumor	10.4261	10.6785	14.0173	0	3.7883	8.6297	10.7322	0.528	13.954	7.9744	12.0392	9.3662	11.3337	10.516	8.3421	7.0031	7.2701	6.7424	10.0242	2.1813	7.4917	6.9055	10.2932	0.528	9.9469	8.5054	10.5401	8.2954	10.8719	6.631	9.1351	5.3652	11.3495	11.7168	7.9673	0.6222	4.6614	11.3365	9.6894	12.2559	8.0752	9.3376	7.6714	9.7312	10.6611	13.6078	0
TCGA-A6-5667-01	01	Tumor	8.5715	10.4608	14.1935	0	3.5877	9.2701	11.5772	3.1096	13.2981	8.944	10.0068	8.7597	12.2627	11.4016	6.83	6.6587	10.1689	0.8859	7.1686	1.1839	5.1942	6.2325	6.8083	3.0369	8.6947	9.2371	10.816	8.1325	10.1646	7.6879	10.5827	5.7434	9.9396	11.358	6.9973	6.2	4.9977	11.8455	9.1792	11.4553	9.6472	10.3844	9.8025	10.1092	11.1826	13.1762	1.4307
TCGA-G4-6293-01	01	Tumor	9.7374	10.4913	14.1212	0.6137	5.9536	8.6158	10.7028	2.064	13.4377	8.7332	9.5602	8.5044	11.3605	9.9672	8.1233	6.3874	8.1612	5.4045	8.8141	3.8861	8.9869	7.5354	9.3085	3.1624	9.7302	8.8107	10.3775	8.7757	10.3349	8.2643	8.66	4.6662	10.6677	12.0044	7.5354	3.4712	6.1387	11.5877	9.6937	11.5947	9.5045	9.1569	8.5336	10.7915	10.9473	13.0896	4.3283
TCGA-AA-3712-01	01	Tumor	8.0472	10.5245	14.2394	0	4.0531	7.8157	11.172	0	13.5711	9.5397	9.3949	9.3186	10.1492	11.1416	7.4136	5.8974	8.666	3.9779	7.1692	4.9707	6.9457	5.6534	7.3848	1.1794	9.0685	7.8997	9.8224	8.339	9.6777	7.3664	11.4576	5.8134	10.0345	11.4402	6.795	3.5584	7.4453	11.5534	8.9505	11.3123	9.5967	9.0652	9.1849	11.7648	10.8186	13.1151	1.636
TCGA-AZ-4616-01	01	Tumor	8.7532	11.0198	13.2859	0	8.0146	8.6639	11.4713	0	13.7827	8.8307	10.4207	10.1823	12.2389	10.8179	8.0983	6.5028	8.7532	4.9724	10.1428	3.9495	10.6188	6.5724	10.2346	7.1898	9.4086	9.562	10.3797	8.9969	10.0263	7.4828	10.8951	6.1947	10.9108	10.8151	7.1191	5.8345	8.8405	11.7362	9.2664	11.7702	9.1048	9.6795	8.6832	10.6491	10.6501	13.1422	2.4553
TCGA-AA-A02K-01	01	Tumor	8.4418	10.8837	13.6827	1.3732	2.5289	9.841	11.3175	3.0968	14.0075	9.4174	9.6177	9.5138	11.8723	11.0825	7.4026	6.9001	7.5008	11.1035	11.1436	9.9821	12.7812	11.0803	13.4023	9.6521	8.9157	9.3936	10.2757	10.5932	10.0001	8.1921	9.3876	5.987	11.1725	11.548	8.8686	0.8851	8.5189	12.0919	8.8808	12.5079	9.6536	9.1052	8.5126	8.3231	11.3802	12.6829	1.1328
TCGA-G4-6323-01	01	Tumor	8.5551	10.7367	15.1591	0	3.8134	9.0559	10.6768	0.6723	13.3841	9.0468	10.2303	8.9714	11.2022	10.902	7.7776	6.7649	7.3386	3.5465	7.7421	2.5232	7.6124	5.3908	6.7528	1.129	9.4195	9.2286	10.1233	7.8337	10.4253	7.5452	8.9387	2.794	9.86	11.3338	7.2287	4.9638	6.3209	10.9791	9.1539	12.136	9.9161	8.979	8.6498	8.296	11.087	13.1707	2.794
TCGA-F4-6857-01	01	Tumor	8.7918	11.1061	14.4794	0	4.3643	8.531	10.6177	3.9527	13.2776	9.232	9.4551	9.3839	11.2067	12.0462	7.3995	6.4438	10.0899	4.4228	7.6526	4.5852	7.2701	6.3262	6.2312	3.2509	8.3916	9.243	9.4452	7.9143	9.9565	7.9094	9.6225	3.1157	9.4852	10.9539	8.1705	7.6571	6.7017	11.1016	8.789	11.5561	10.4129	10.052	9.14	10.6968	11.3236	12.788	5.0607
TCGA-DM-A282-01	01	Tumor	7.5109	10.634	15.0255	0.8903	1.648	9.7341	11.1836	1.8322	13.5415	9.2173	10.2299	9.7984	12.501	10.7626	8.0898	6.8965	8.3478	5.5705	8.5503	4.8235	9.6008	8.8014	9.6758	3.9552	8.244	9.65	10.0515	8.8189	10.7777	8.7307	8.9997	5.6089	10.1722	10.5682	5.7978	4.0438	5.5962	11.5178	9.3111	12.184	9.4939	9.9538	9.1782	9.9703	10.7625	13.0056	1.1893
TCGA-DM-A1D8-01	01	Tumor	7.5994	10.6104	14.3626	0	3.2614	9.3643	11.3058	0.9936	13.4896	9.3456	9.8224	9.079	12.0892	11.1164	7.8242	7.4356	7.7014	4.38	8.3851	3.4477	8.167	6.0888	8.5481	4.7064	8.6477	9.7783	10.7888	9.7032	10.5786	9.1411	10.7558	6.1505	10.4255	11.25	6.9336	0	6.3909	11.4816	9.4472	12.066	9.4127	9.702	8.6899	8.1781	10.146	13.1999	1.407
TCGA-NH-A5IV-01	01	Tumor	8.8286	11.0052	14.0409	1.7479	4.5966	8.4172	10.7573	1.1239	13.4602	9.6688	9.8987	8.757	11.1121	10.4964	7.7286	6.5739	8.3648	3.9584	7.8417	4.573	10.3761	6.0755	8.4693	7.24	9.6779	9.1484	10.3611	8.2101	9.9428	8.14	10.3774	4.7935	10.4814	11.0795	8.4709	4.5732	4.5489	11.0623	9.4568	12.2	9.7309	9.0836	8.658	9.1866	10.9481	12.8315	2.3019
TCGA-AZ-6601-11	11	Normol	8.7312	10.3971	14.5306	0	4.3131	8.4595	10.7367	2.4833	13.5214	8.4435	9.8616	8.8524	11.4543	10.6042	7.6289	6.387	12.6069	6.6799	8.6944	7.887	9.8801	7.6765	9.7781	4.6427	9.471	8.8855	10.8417	8.2309	10.5369	7.3953	10.8762	2.1926	10.6235	11.5919	8.1914	7.8261	3.6117	11.6862	9.2675	11.3471	9.43	9.1174	9.2102	9.5545	11.0464	13.2084	2.0219
TCGA-AD-6901-01	01	Tumor	7.9081	11.01	14.3026	0.6106	5.4136	9.3562	11.3762	3.1544	13.4086	9.6627	9.056	9.047	11.2492	11.3569	7.1992	7.1783	10.5231	3.3157	8.0411	5.182	8.37	5.9692	6.0857	3.5283	8.6974	9.5783	9.067	8.5095	10.3827	7.7582	10.803	2.9726	9.6175	10.5813	7.6788	6.8236	5.283	11.1322	8.4085	11.6926	10.5267	10.1236	9.5451	10.3286	10.7584	12.3677	2.229
TCGA-CK-6748-01	01	Tumor	7.5227	10.7184	15.6786	0	3.8492	9.5555	11.3428	4.619	13.4849	8.516	10.3411	9.3051	11.6777	10.9303	7.9875	6.4246	10.1515	3.1247	7.892	3.8492	7.9262	6.7315	7.0251	2.5551	8.3884	8.3583	9.7156	8.1788	10.1971	6.7425	10.5337	5.4487	10.3675	10.8334	7.7818	5.4165	7.0737	11.8751	8.653	11.9025	10.0317	10.0364	9.4828	12.4778	11.0872	12.7968	0
TCGA-A6-6141-01	01	Tumor	9.5285	10.4686	15.0313	0	3.8612	8.649	10.866	3.0672	13.5215	8.8604	9.948	8.9221	11.2391	10.5293	8.1463	6.8609	8.3532	4.4127	8.1865	4.8107	9.2157	7.1731	8.422	3.8612	9.0397	8.7799	10.3224	8.9371	10.2766	8.4117	8.4779	3.8612	10.4376	11.2109	7.2683	7.5067	5.9081	11.635	9.0091	11.6305	10.1433	9.4144	9.8023	8.9055	11.1214	12.6281	2.8381
TCGA-3L-AA1B-01	01	Tumor	8.3464	10.3843	14.7315	2.8652	3.5995	9.3548	10.9661	3.2786	13.0563	9.4548	9.7106	9.0669	11.2539	11.1478	8.4377	6.8702	10.0091	1.2932	7.1809	2.4201	6.5816	4.9075	6.7004	1.7731	8.73	9.1722	9.8406	8.5265	9.8199	8.0473	10.6827	2.1325	9.8375	11.153	6.4759	2.6069	6.6527	11.4839	8.7463	11.2516	10.2378	9.4379	9.3591	9.7355	11.4972	13.2161	5.0407
TCGA-AA-3496-01	01	Tumor	8.8804	10.615	14.7167	0	5.8508	9.6505	10.0221	2.6739	13.2401	9.8003	10.5212	8.8471	11.562	11.2493	7.1928	6.9649	8.9925	4.9256	8.2811	4.2006	9.9864	6.7299	9.1956	4.1341	8.4096	8.5031	10.408	8.9506	10.1944	7.2761	10.337	5.2261	10.6725	11.5969	8.1526	4.1734	3.6543	11.0326	8.4443	11.5855	9.7208	9.1434	8.9819	11.213	12.0256	12.7464	3.0067
TCGA-A6-2678-11	11	Normol	9.1739	10.3815	14.7114	0	3.9923	8.8264	10.8196	1.3618	13.4305	8.6413	9.9656	8.7961	11.6005	10.2976	8.2461	6.747	11.0923	9.5528	10.8628	10.3743	12.0584	10.476	12.4758	5.3168	9.7862	8.9923	10.5987	7.5715	10.4352	8.6767	10.9063	3.5838	10.4827	11.634	9.6263	8.7099	3.5358	11.9809	9.6249	11.7604	9.7037	9.0263	9.0745	8.4524	11.2206	13.4021	2.4107
TCGA-CM-6170-01	01	Tumor	8.1506	11.07	14.167	0	4.7431	9.3564	10.8628	1.8052	13.0818	9.2367	10.5071	9.0268	11.0372	11.4397	7.0441	6.8276	8.4626	4.9513	8.5404	4.8919	8.2426	7.9074	8.8352	2.3668	8.2524	8.7541	10.2533	8.1619	10.7523	7.1108	9.5368	4.1738	10.1168	10.3083	7.1991	4.7408	5.0083	11.4564	9.3809	11.1569	9.6855	9.4615	9.2832	10.2079	11.3487	12.6399	1.6225
TCGA-AU-3779-01	01	Tumor	8.303	10.7284	14.5418	0	4.7301	10.2529	11.0683	1.8505	13.6277	9.9301	10.691	9.8936	11.7198	10.4442	7.7144	6.814	7.9935	3.5785	7.2691	3.3017	7.6143	6.249	8.0905	6.249	8.9698	8.1366	10.2135	9.1152	10.3954	6.5985	10.6779	4.581	10.4868	10.6719	7.9786	9.4716	5.3805	11.7611	9.0271	12.147	9.4704	10.1429	9.3102	10.3013	11.1526	12.6924	2.0452
TCGA-G4-6315-01	01	Tumor	8.7406	10.5603	14.1838	0	2.9418	8.7681	11.262	2.6186	13.3302	9.2459	10.5282	9.1924	11.5684	11.1009	7.7949	6.5476	7.0343	7.9972	9.8659	8.6475	10.1277	9.075	11.334	3.9919	8.841	8.7509	10.3983	8.5382	10.5415	8.068	9.55	6.1377	11.1695	11.5063	6.4235	2.802	3.9445	11.9175	8.7319	11.3666	9.4601	9.4861	7.9318	9.534	11.1711	13.0556	0
TCGA-G4-6310-01	01	Tumor	8.2802	10.7365	14.4759	0	2.9517	9.007	10.6588	4.9161	13.1075	9.4399	10.2768	9.0826	11.2038	11.8673	7.7537	6.7251	12.7411	0.8061	9.1238	3.9973	7.901	6.8237	6.187	2.8049	8.1943	9.1863	9.9844	8.8291	10.1934	6.4318	12.5733	4.3548	9.7157	11.7227	6.1109	4.741	4.5518	11.2125	9.9992	12.2424	9.9378	9.5072	9.6091	9.8016	11.5402	12.8533	0.8061
TCGA-5M-AATA-01	01	Tumor	9.0931	10.1337	14.4582	0	3.4516	9.2708	12.3676	3.285	13.6663	10.2166	9.7625	9.5737	11.4893	11.0856	7.9468	6.5491	7.6988	1.9196	8.2997	2.9559	9.4756	5.5705	7.7098	0.8441	8.9013	9.0407	10.2696	10.4625	10.5758	7.5658	11.2299	3.8599	10.7266	10.6594	6.8116	2.4098	10.4362	11.7834	9.1335	11.9724	10.2457	9.1652	9.0483	10.794	11.0606	12.9755	2.8801
TCGA-A6-5659-01	01	Tumor	8.779	10.6682	14.6057	0	3.3744	8.6069	10.5257	3.2507	13.2761	9.2483	10.2215	9.3227	12.415	11.6117	7.0741	6.5326	9.5812	1.4349	8.151	2.3949	6.0199	5.2661	6.9049	3.1847	8.9023	8.6396	10.2461	8.1499	10.1777	6.5058	12.032	5.8704	10.436	11.6543	6.6473	1.8301	6.0938	11.025	9.3726	12.1025	9.3596	10.2901	9.5683	9.8616	11.3057	12.9084	1.1876
TCGA-D5-6537-01	01	Tumor	9.7181	10.3313	14.3281	0	4.7582	8.725	11.1976	0.5133	13.3597	9.1904	10.9666	9.33	12.2038	11.2571	7.6751	6.7405	5.8957	3.9567	8.338	2.1434	7.6538	6.1071	8.064	5.4504	9.6675	8.5452	10.064	8.419	10.2752	6.3072	10.4837	5.7197	10.774	11.6891	6.5633	1.8658	5.8536	11.3276	8.6955	12.1069	9.3734	9.8877	8.2836	9.5662	11.667	13.5211	0.5133
TCGA-AA-3663-01	01	Tumor	9.3683	10.0391	14.2969	0	4.7156	9.0842	11.161	3.2082	13.7559	8.0243	10.367	8.8738	10.7331	11.2138	8.3669	6.9914	7.4206	4.2159	8.7037	1.6771	4.8591	5.2197	7.2696	0	9.7932	9.283	10.3478	5.8879	10.524	7.6976	10.2386	5.2197	11.9288	10.8896	8.5724	2.3267	8.7614	11.3993	9.7451	13.1476	8.8906	9.0815	8.3788	9.6643	10.7668	13.55	0.6318
TCGA-D5-6529-01	01	Tumor	9.472	10.4359	14.8697	4.5855	6.0114	7.6324	11.0713	5.1503	13.5312	9.2649	9.5379	8.5442	11.5147	11.2977	7.3198	6.5805	9.4522	4.9065	7.6557	3.5903	6.3574	5.9375	7.5883	3.5903	9.7046	8.4467	10.0905	8.3751	10.1647	7.2518	10.8328	3.7955	10.0384	11.4918	7.8466	3.3807	6.7882	11.3827	9.0875	11.6774	10.0244	9.8228	9.5378	11.631	11.3034	13.6748	3.1413
TCGA-AA-3514-11	11	Normol	8.9583	10.417	14.1208	0	6.873	7.7266	10.2444	0.5366	13.8248	8.1746	9.4871	9.4157	11.8217	10.3273	7.9188	6.2169	9.7729	9.4004	10.2837	9.7914	12.3745	10.0208	12.3641	2.3375	10.4065	9.0083	10.8826	8.2387	10.2784	8.3297	9.9351	3.5059	11.5937	11.9149	8.7171	6.9037	3.8593	12.2195	9.7292	12.8883	8.7908	8.8946	8.6571	7.7357	11.2571	13.7911	1.7015
TCGA-D5-6927-01	01	Tumor	8.9762	10.5758	14.4906	0	6.7345	7.9012	10.8414	1.7033	13.3222	8.76	9.8313	8.9534	11.1942	11.0072	8.313	6.3517	9.1	6.656	9.4946	6.2484	10.4117	6.4848	10.4459	6.8377	9.7644	8.8048	10.3095	8.7409	10.2162	7.6407	10.8463	3.6832	10.8432	11.0451	7.6809	4.5221	5.5098	11.394	8.7166	12.5456	9.161	9.095	8.9794	11.1626	10.8992	13.2318	3.8047
TCGA-AA-3520-11	11	Normol	9.5705	10.3146	14.5008	0	4.3517	8.709	10.5174	1.6231	13.6976	8.4853	10.2766	9.1247	11.6248	10.8401	8.0282	6.6221	9.9602	10.6759	12.1087	11.5957	13.1201	11.6245	13.7896	7.2203	9.906	9.0283	10.6908	8.0528	10.5234	8.8261	10.1261	4.0832	10.5617	11.7872	8.2629	7.757	4.5138	11.9853	9.9627	12.1715	9.2234	9.221	8.6075	8.3125	11.3247	13.6948	1.9161
TCGA-A6-A565-01	01	Tumor	9.3073	10.5293	14.4831	0	4.8443	8.1986	10.2054	6.0698	13.2581	8.5584	9.4645	9.2654	10.7684	10.8575	7.6025	6.1546	9.4627	4.3641	8.6001	4.9857	9.3978	6.2558	7.8045	3.6393	9.177	8.76	10.1808	8.988	10.0354	7.5859	9.7602	2.6266	10.9676	11.0798	8.2167	6.7594	4.6876	11.5518	9.2559	11.4742	9.7552	8.9229	9.1528	11.0129	10.9178	13.0115	3.1911
TCGA-A6-2675-01	01	Tumor	7.9261	10.6827	14.7853	0	5.3356	8.5991	11.2478	4.7492	13.312	8.5301	9.6038	8.469	11.7006	11.0447	7.4353	6.5513	9.8365	8.6542	9.5534	9.0237	10.6926	9.0401	11.6183	4.6285	8.7888	8.9564	10.3827	7.776	10.1087	7.0156	10.8781	3.1846	10.3171	11.1644	8.2538	6.3218	5.4468	11.472	8.9966	11.4821	9.8568	9.9809	10.1059	10.8382	11.2356	12.6287	1.6589
TCGA-G4-6306-01	01	Tumor	9.7391	10.3216	13.277	0	3.6159	9.8805	11.9756	0.7687	13.8678	9.2226	9.8512	9.1838	12.0165	11.8882	7.9866	6.265	4.794	6.417	8.882	5.3366	8.0531	8.4339	10.2442	3.6964	8.3678	9.6113	9.9793	8.4736	9.8773	9.2603	9.7055	5.0907	10.8259	11.3828	6.889	0.7687	8.6962	12.3048	10.535	12.4776	9.9733	10.209	7.4025	7.7665	11.0641	13.2643	2.1759
TCGA-G4-6320-01	01	Tumor	9.4629	10.7779	14.1174	0	2.0088	8.9676	11.2536	2.0088	13.73	9.5811	9.98	8.9849	10.6748	10.301	8.1033	7.4017	5.9979	6.6896	10.0167	10.2582	11.5838	9.0863	10.3072	6.5193	8.6249	9.2756	9.8299	8.9693	10.3915	8.3127	6.872	3.4166	10.0761	11.1271	7.0734	1.7738	7.0538	12.0038	10.2337	11.6917	9.7999	9.2775	9.0506	8.8034	10.7367	12.9265	1.1439
TCGA-DM-A28K-01	01	Tumor	9.3532	11.7187	14.3807	0	3.5719	8.0271	11.2644	0.6028	14.1841	8.6299	9.8604	9.3871	11.0248	9.4333	8.3474	6.7664	5.3915	4.1373	8.7234	1.6204	5.7243	4.8324	6.8403	1.0267	9.1108	8.4321	10.071	9.9865	10.5077	7.4276	9.478	5.5909	11.4088	10.5138	7.0749	5.6674	2.8528	11.4033	9.7533	12.9225	9.9317	9.0708	8.46	10.0415	10.5277	12.8502	1.0267
TCGA-A6-2671-11	11	Normol	8.9498	10.3563	14.5924	0	3.8911	9.0353	10.9033	2.8658	13.8401	8.5231	9.794	9.2472	11.5103	10.3705	7.9734	6.4063	11.5595	9.4046	11.1491	10.3614	12.6667	10.8038	12.8279	4.8626	9.4794	9.2933	10.4527	7.7571	10.5337	9.4563	10.9547	4.1851	10.4414	11.5328	8.7022	7.8226	4.6621	12.3974	9.6228	12.089	9.7236	9.1883	8.9596	9.0806	11.3079	13.6735	2.3765
TCGA-AZ-6600-01	01	Tumor	9.0114	10.5413	14.0273	0.5103	4.0245	8.3766	11.1157	4.5007	14	8.9533	9.5071	8.8215	11.7388	11.5545	7.662	6.0227	9.7766	5.5621	8.5417	3.907	8.6416	6.2254	9.0244	4.4455	8.9681	8.7408	10.5814	8.6861	9.9098	7.6589	11.0494	2.8805	11.0589	11.4987	7.7095	4.1092	8.5483	11.7445	9.8428	11.9572	9.4887	9.6255	9.3818	11.1444	10.5357	13.509	2.1356
TCGA-D5-6926-01	01	Tumor	8.8505	10.983	14.5368	0	5.8174	9.0825	11.5284	2.1403	12.8854	9.4431	9.2241	8.7369	11.7112	11.5244	7.0376	6.067	10.175	4.864	7.5905	4.7314	8.3716	7.1885	8.2128	3.2512	8.7181	8.451	9.9	9.0108	10.2732	7.8655	10.7819	4.7081	10.3182	10.6062	8.1142	5.0372	5.5018	11.0532	8.9168	11.2566	10.4014	9.6679	9.7904	11.8566	11.2883	12.6722	1.9937
TCGA-AD-6964-01	01	Tumor	9.0739	10.8993	14.4223	0	6.4879	8.4146	10.854	6.1345	13.4738	8.7069	10.1474	9.198	10.72	10.3165	8.3888	6.7715	10.3562	7.644	9.9475	8.7926	11.8779	7.941	11.3064	7.843	9.5141	9.4968	10.4157	7.6525	10.468	6.4661	9.9287	2.9493	10.1011	10.9769	8.9981	6.7466	6.4328	11.2337	8.9061	12.2334	10.0268	9.4502	9.0811	10.4459	11.4152	12.9672	2.125
TCGA-A6-2686-01	01	Tumor	9.4596	10.1529	13.3275	0	6.822	9.7831	11.1037	3.8242	13.8708	9.2	10.468	9.4098	10.9598	10.9428	7.6849	7.5696	8.6485	4.9191	7.6363	2.7763	6.5934	5.895	6.7122	0.573	9.7186	9.0013	9.3397	8.1294	9.7911	8.3147	11.067	5.3739	11.2534	11.5055	9.3464	7.1855	11.45	11.1707	9.5757	12.3253	9.8773	9.4149	9.1198	10.0871	11.0897	13.6504	1.5609
TCGA-AZ-6608-01	01	Tumor	9.661	10.96	14.6539	0	1.9475	9.2756	11.6949	0.4939	13.6081	10.2926	10.1272	9.8128	12.0202	10.6879	8.3734	7.1634	5.2378	6.1034	8.7726	5.701	7.3088	7.9419	10.3688	4.8251	8.9209	8.7064	10.7509	7.2844	11.0318	7.6393	9.2898	5.9211	10.1311	10.7922	5.8716	0.9429	4.3056	11.6655	9.1371	12.432	9.6077	9.4251	9.2813	8.7385	10.9235	13.3492	0.4939
TCGA-5M-AATE-01	01	Tumor	8.6507	10.3705	14.3014	0	2.8436	9.4817	10.89	0.754	13.6831	9.5065	9.686	9.0655	11.979	11.7033	7.0754	6.4137	8.3982	0.754	7.4429	1.2467	5.8744	5.6561	7.5734	2.1481	8.6057	9.071	10.115	9.7943	9.639	7.7586	11.7791	5.4221	10.3156	11.3926	5.4898	0.754	5.3511	11.412	9.0185	11.8813	8.94	10.1965	8.8224	9.3586	11.0259	12.7759	0.754
TCGA-CK-5915-01	01	Tumor	9.2606	10.131	15.1979	0	2.0385	8.7225	10.8053	0.5301	12.849	8.7561	9.9112	8.7331	11.8927	11.5217	7.4334	6.2821	6.0979	5.2254	8.401	4.693	10.3077	7.0921	9.0865	5.4472	9.5797	8.4839	10.8722	9.2991	10.7652	7.9063	7.0779	4.668	10.42	11.6704	5.4618	2.9002	3.6993	11.3008	9.7962	11.468	8.6106	9.0185	9.8631	9.8679	10.8102	13.343	0.5301
TCGA-D5-6922-01	01	Tumor	8.8466	10.9716	14.1419	0	4.5435	8.2468	11.9147	3.6462	13.561	9.0488	8.9706	8.48	11.0288	10.406	7.3487	6.5414	10.6944	4.4516	8.5715	5.7137	10.417	7.9093	9.7822	4.9819	8.8523	8.8911	10.2051	8.7939	10.1576	7.852	10.3557	5.6531	10.2784	10.9687	7.613	3.8221	5.8187	10.6767	9.1286	11.107	10.1953	9.2727	9.788	10.8742	10.6948	12.7939	3.0356
TCGA-G4-6321-01	01	Tumor	8.0471	10.5184	14.5052	0	4.2316	7.5853	10.6012	1.5735	13.9804	8.4924	9.3846	9.241	10.3876	10.6282	7.1019	6.2246	7.6994	5.5377	8.2912	5.475	9.5213	7.0668	9.0782	0.7301	8.9244	8.7543	9.9248	7.6143	9.7767	8.611	9.1078	3.5286	11.0068	10.8859	8.9968	5.6937	4.7023	12.5097	9.2012	11.5927	10.0158	8.8432	7.3375	7.259	11.3233	13.6106	0.7301
TCGA-A6-A5ZU-01	01	Tumor	8.2695	10.4091	14.8408	0	4.0915	10.0318	11.3221	4.4853	13.4258	9.1986	8.9828	8.2695	11.1972	11.4656	7.8767	6.3909	9.3043	1.2248	7.4935	0	5.1057	5.8371	3.3731	0	8.8149	9.3375	9.4175	9.3956	9.3988	6.8747	9.8762	1.8776	10.1159	11.2694	7.739	2.3254	8.5729	11.5014	9.4658	11.1581	9.5194	9.8843	10.1349	10.6442	11.4888	12.3724	1.8776
TCGA-F4-6463-01	01	Tumor	8.9498	10.2366	15.1981	0	3	8.2503	11.1972	4.858	13.3226	8.8156	10.2285	8.5736	11.5132	10.6421	7.7004	6.3399	10.3641	4.4263	8.2946	2.4594	7.4757	5.9069	7.8796	2.1699	9.3399	8.445	10.421	8.6841	10.5464	7.5546	9.4584	4.3219	10.3134	10.9318	6.9189	4.594	7.8673	11.4043	9.2738	11.4931	10.3939	8.6645	9.769	10.9095	10.7054	13.5979	9.9993
TCGA-AA-3526-01	01	Tumor	9.7427	10.6915	14.0125	0	5.4311	9.3313	11.1466	2.0727	13.6177	8.2314	10.423	9.6254	11.4419	10.5893	7.799	7.2447	7.3215	5.9945	9.6536	5.4911	9.0199	8.0836	10.3968	5.1439	9.9079	9.0388	10.7746	9.3991	10.6378	7.3502	9.713	6.0151	11.0841	11.1211	7.9076	8.5836	6.9026	10.9695	8.9005	12.7214	9.1605	9.2179	8.7566	10.1798	10.619	13.3723	2.0727
TCGA-AA-3527-11	11	Normol	9.1532	10.342	14.4415	0	5.3897	8.4687	10.4908	3.2846	13.6819	8.4264	9.6737	9.1282	11.6476	10.413	8.0038	6.3965	11.0645	10.2309	10.9398	10.7088	12.2047	10.5779	12.9205	4.9251	9.9981	9.0954	10.65	8.0506	10.4834	8.4312	10.8131	4.5037	10.948	11.7907	8.7949	7.7944	5.3531	12.0693	9.9485	12.7071	9.4681	9.2056	9.3181	8.3623	11.2201	13.56	1.6316
TCGA-F4-6570-01	01	Tumor	8.0281	10.8453	14.3167	0.5254	6.2249	6.9643	11.1034	2.0267	13.4497	8.7169	9.2708	8.7721	10.6202	10.4316	7.8528	6.2584	9.7748	5.2102	8.1713	3.7333	6.5016	6.4002	6.7573	1.4631	9.6287	8.9859	9.2298	9.6284	9.7225	6.6414	9.9832	4.145	11.0113	10.6028	8.6289	9.5072	4.9886	11.3296	8.9846	12.6419	9.3063	9.0645	9.4235	11.4597	10.7666	12.9414	2.7464
TCGA-G4-6317-01	01	Tumor	8.1768	10.314	13.5196	0	1.8994	9.5846	12.4334	1.0651	13.4816	9.4379	10.9042	9.9798	12.361	11.2514	8.8652	6.9465	5.3529	2.5645	8.3437	0.6286	5.9956	7.1708	9.2731	5.853	8.3961	9.5044	9.8346	8.6154	10.7244	7.9566	10.055	4.0737	10.4367	11.3758	7.009	1.2717	3.6403	11.7703	9.5	12.9161	9.4045	10.0806	9.1892	8.2144	11.1957	12.8408	0.6286
TCGA-SS-A7HO-01	01	Tumor	8.9662	10.7532	13.536	5.2963	3.7676	10.1463	11.8747	0.5213	13.1971	9.2356	9.7846	9.79	11.6442	12.2146	7.6648	6.5364	7.4589	2.2976	7.2562	2.0166	6.8069	6.3793	7.3554	4.0207	8.8809	8.996	10.8587	11.0262	10.9329	6.8511	9.2083	7.0154	10.9482	11.0468	6.7556	5.7873	7.532	10.3026	9.2189	10.7338	9.6121	9.474	8.8293	9.8324	11.1159	12.7844	1.4545
TCGA-4T-AA8H-01	01	Tumor	8.4258	10.3	14.9829	0	3.0551	8.7463	11.5136	2.219	13.7168	9.2216	9.8249	9.6401	11.5679	10.4561	8.0091	5.9972	7.345	3.7473	7.2581	5.7453	9.6215	5.9468	8.5492	7.0746	9.7799	8.599	10.2883	7.8836	10.2049	7.6794	9.4496	4.2689	10.0384	11.5824	6.4231	0	6.8824	11.6526	9.1562	12.1528	9.5738	9.6544	9.0744	8.5716	11.2837	13.5272	0
TCGA-CM-6162-01	01	Tumor	9.364	10.5413	14.9759	0	6.8017	7.392	10.2058	6.1759	13.2632	8.1285	10.0901	8.3302	10.34	10.8262	6.8476	5.9509	10.9872	6.4683	9.9337	7.392	10.5285	8.4449	9.8683	5.0461	9.1307	8.2829	10.2081	8.8244	10.084	6.0925	11.005	2.6815	11.3927	10.8748	8.8153	5.9141	4.7154	10.7877	9.5422	11.7324	9.7531	8.6401	10.687	11.5719	10.7672	12.7618	1.7032
TCGA-AA-3489-11	11	Normol	9.5218	10.2158	13.8732	0	8.0069	8.8725	10.3799	7.7539	13.8537	7.8572	10.5442	9.8112	11.1479	10.5776	8.1578	7.5411	11.8495	10.9472	11.0503	11.2152	12.9164	10.399	13.5474	6.7029	10.0506	9.1026	10.6127	8.0969	11.2438	6.3386	12.8417	3.9763	11.3116	11.527	9.2018	8.6913	5.386	11.3917	9.472	12.8682	8.9784	8.9117	9.1581	8.5793	11.0271	13.4276	1.4333
TCGA-DM-A1D4-01	01	Tumor	9.3425	10.8095	13.9892	1.1525	2.4553	8.9622	10.6107	0	14.3461	9.8068	10.4139	10.0152	11.3292	10.6624	8.3627	7.0738	5.1225	0.8602	6.8876	0.4933	3.1943	5.5441	6.2326	2.9112	8.0125	9.2018	10.2948	9.0611	10.68	7.9013	9.0635	5.5314	10.7119	11.5163	6.5093	1.6988	4.962	11.3376	9.2852	12.7885	9.0166	8.8278	8.4426	8.4843	10.7693	12.8893	1.7849
TCGA-QG-A5YV-01	01	Tumor	8.6342	10.9544	14.0736	0	3.4382	8.0418	10.8645	0.4788	13.683	9.097	9.4677	8.7189	11.314	11.0135	7.5841	6.6004	7.5175	2.6127	7.2604	4.099	7.9368	5.9451	7.1367	3.1492	8.8539	8.8914	10.5317	9.1531	10.4032	8.218	9.1915	4.2258	10.6193	11.1794	6.9194	3.7022	4.5261	11.4043	9.3941	11.6141	9.4809	9.1879	9.1431	9.6388	10.5452	13.2976	1.7491
TCGA-CA-5796-01	01	Tumor	8.7082	10.2879	15.0133	0	3.4885	7.1454	10.418	2.0686	13.5719	8.775	10.2256	9.0255	10.6996	10.4989	8.456	6.826	6.7848	5.4532	9.1147	6.1556	9.6024	7.0089	9.5207	2.2732	9.118	7.3055	10.3272	8.1155	10.3222	6.1029	9.7963	2.0686	11.3155	11.8375	8.3526	2.4472	5.7558	11.1598	9.3935	12.0979	9.0861	8.9537	8.6994	9.467	11.006	13.0537	1.5444
TCGA-G4-6626-01	01	Tumor	8.4625	11.3536	13.6516	0	3.6828	8.339	11.7337	0	13.2261	9.373	10.4761	9.5594	11.4179	10.5085	6.921	6.4558	7.1653	3.2224	6.6519	2.6469	6.1971	3.8676	5.697	0.9517	8.8226	9.0183	9.8076	8.8487	10.9323	7.4666	10.3681	5.8693	9.9935	11.1806	7.2426	4.55	6.321	11.9283	8.0332	11.3718	9.551	9.9166	8.3292	9.4658	11.3686	12.9056	0.9086
TCGA-DC-6156-01	01	Tumor	9.3905	10.5442	14.8095	0.9674	5.0857	7.2474	10.9044	5.1258	13.3446	8.8881	9.3351	9.3157	10.6645	11.9995	6.7226	6.9705	10.1773	1.2827	6.7161	4.0255	7.2699	5.6358	4.7438	2.4057	8.4201	8.4039	10.1773	8.4982	9.9271	5.8541	10.5419	2.1189	9.9221	11.0823	8.4676	6.0047	6.3099	10.6998	9.3468	11.1617	10.1109	9.2804	10.5167	11.1659	11.1253	12.3075	2.8499
TCGA-DC-6160-01	01	Tumor	8.4947	10.6613	14.4836	0	5.2824	6.574	10.1831	1.3674	13.4978	9.3627	10.5567	9.5404	11.1349	11.3493	6.7253	6.4404	7.2393	3.6538	7.2741	5.3018	7.2593	5.3018	7.1297	2.2285	8.5666	7.505	10.3031	7.1328	10.4806	7.4143	10.1729	3.7129	10.63	11.5369	6.7108	4.0268	3.3152	11.4123	8.6784	12.5433	8.733	8.9964	8.2371	10.159	11.0795	13.0317	2.0566
TCGA-EI-6512-01	01	Tumor	8.4025	10.5971	13.9323	0	5.5687	8.2023	10.3257	0	13.4667	8.5091	9.5693	8.9605	12.307	11.3607	7.329	5.9043	7.0647	3.6695	8.487	3.6194	5.6077	5.6205	7.074	0	9.5153	8.8344	10.1454	8.2236	9.2428	7.9136	9.774	4.8904	10.8061	11.4041	6.9528	4.2029	7.7103	11.5918	8.9643	11.7152	10.0734	10.401	8.5078	10.3449	10.735	13.4013	1.2033
TCGA-DC-5869-01	01	Tumor	9.8996	10.8465	14.6187	0	3.7071	7.9847	10.8204	3.6528	13.0972	8.3836	10.2465	9.4591	12.1637	11.7059	8.3169	7.3452	8.3082	5.7566	8.5409	5.0995	8.4542	8.1797	10.2832	6.4567	9.7883	8.7182	11.2536	8.1895	11.1501	6.6902	11.2171	5.6217	10.7749	11.6159	7.4324	3.0351	5.6635	10.8923	10.0398	12.0029	8.6261	9.5557	8.7606	9.9112	10.8422	13.2046	0.9744
TCGA-EI-6507-01	01	Tumor	9.6559	10.1269	14.4681	0	6.3816	8.0053	10.5076	0	13.543	9.2195	9.659	8.6569	10.4404	11.0638	7.9187	5.9698	8.9521	3.8735	9.8026	4.7307	9.2698	6.9886	6.7614	4.7544	9.1926	8.6299	10.2055	8.9835	10.1006	7.4145	10.7922	5.3913	10.6531	10.6664	8.6742	7.0428	8.5251	10.7792	9.2249	11.6251	11.035	8.528	9.4775	11.4744	10.4942	13.5427	3.5327
TCGA-AF-3911-01	01	Tumor	8.8319	11.1337	14.5553	0	4.135	9.0577	12.2317	5.3138	13.6349	9.3591	9.7786	9.226	11.1258	11.0791	7.4647	6.3765	9.1045	4.3613	7.9516	5.6065	7.7664	6.9879	8.5853	3.5773	8.6758	8.5915	10.3226	8.7305	10.0428	7.5666	10.6679	5.5154	10.7255	10.6307	7.5334	3.4579	6.4942	11.4903	9.7768	12.078	9.508	9.56	9.5217	10.4837	10.9881	13.0523	1.5794
TCGA-EI-7004-01	01	Tumor	8.0479	10.5579	14.9298	0.5189	5.3205	8.2685	10.3414	8.1215	13.8936	8.8088	9.2944	9.1467	10.2196	10.412	7.2812	6.2459	12.0747	4.2287	9.2559	4.6074	10.003	6.3102	8.4651	1.662	8.5608	9.0141	9.5597	9.7176	9.8956	6.4596	10.942	1.847	10.6283	10.7947	7.9477	6.2991	5.2067	11.3604	8.1437	10.9241	10.5895	9.2246	10.6008	12.8553	10.7461	13.2803	2.0109
TCGA-G5-6572-01	01	Tumor	8.4036	10.3428	14.8497	0	2.5476	8.3705	10.8362	5.9158	13.5642	9.4926	10.0817	8.5049	10.6054	12.5127	7.9387	7.3546	8.9476	4.9677	8.3915	3.5237	7.8879	5.9725	7.7807	4.1006	9.0435	8.971	10.1755	9.7501	10.5373	7.3731	11.2448	3.8809	9.6846	11.6031	6.649	5.5116	4.3206	10.9709	8.7274	11.7848	9.6703	8.979	9.7077	8.7958	11.2551	12.5779	2.5476
TCGA-EF-5830-01	01	Tumor	9.1072	10.6633	14.5723	0	3.0127	7.8631	11.7661	0	13.6612	9.5122	9.6604	9.1655	10.9233	11.6436	8.7909	6.7491	8.0003	5.945	8.6107	4.2617	7.8378	6.8023	8.8662	1.5946	8.6328	9.0698	10.6652	8.0006	10.4223	7.6726	9.4407	4.4401	10.9097	11.3968	5.9091	2.2255	8.5497	11.7214	9.891	11.64	8.9672	9.12	8.6816	9.0368	10.483	13.3863	3.335
TCGA-F5-6812-01	01	Tumor	8.268	10.7625	14.9353	0	4.7612	8.5823	11.1557	5.7472	13.5777	8.5104	9.8707	9.4513	11.3231	11.5055	7.473	7.1929	11.5335	2.7439	7.6876	4.0998	7.4921	6.3941	5.4509	1.5359	8.9496	8.7807	10.7209	8.2023	10.8483	6.9977	10.8821	4.8823	10.1437	11.0138	7.7933	5.4703	5.9042	11.3746	9.7218	12.0257	10.3239	9.3004	9.7153	9.8762	11.0084	12.4105	0.9633
TCGA-CI-6624-01	01	Tumor	9.2887	9.985	14.9083	0.9424	4.4112	8.2046	10.83	5.6659	13.5976	9.163	9.8271	9.4265	11.2625	11.3882	7.7377	6.3914	9.3254	3.9341	7.2406	5.2775	8.6835	7.1452	7.7315	2.0792	9.8013	8.5174	11.1112	8.1562	10.9009	6.8199	10.3817	3.89	10.7041	11.4718	7.8715	10.1738	4.694	11.1024	9.9117	11.6967	9.6448	9.37	9.5889	10.9688	11.2968	13.1595	1.7243
TCGA-AG-3902-01	01	Tumor	8.3131	10.4516	13.3719	0	6.4128	8.5309	11.8337	2.3813	13.5051	8.8567	8.6212	8.8257	11.6172	11.2345	7.4584	6.6708	8.15	4.4838	8.3335	5.2448	9.4219	7.9358	9.6261	5.4724	8.9146	9.5835	10.3462	9.5862	10.0258	8.2744	8.6238	5.4404	10.6172	10.5605	8.4138	5.0622	9.4422	11.7957	9.411	12.2459	9.9532	9.8531	8.4028	8.5583	10.5758	13.0112	3.662
TCGA-EF-5831-01	01	Tumor	8.1211	10.6171	13.7624	0	3.1798	7.7819	11.5885	1.2766	13.5919	9.4315	10.4378	9.4936	11.9964	11.9077	6.3339	7.2322	8.239	0	6.89	0	4.8803	4.3535	4.3866	0.5599	8.878	8.0711	10.7781	8.6433	11.1328	7.1862	10.2663	2.9334	10.5072	11.41	7.4977	3.5181	5.4011	11.2076	10.0607	11.938	9.6388	9.6098	9.7463	10.7668	10.8669	12.9959	1.9431
TCGA-AG-3731-01	01	Tumor	9.0584	10.3837	14.5945	0	6.0854	8.5981	11.2301	4.2455	13.0535	8.7547	9.8733	8.5326	10.9319	11.9446	7.3664	6.5412	9.7629	5.653	8.4211	7.0163	10.31	7.5571	10.1149	7.2075	9.0769	8.681	10.8762	8.1101	10.2429	6.4869	11.0268	5.539	10.6204	11.3346	8.504	7.3942	6.0608	11.1625	8.6207	11.7904	9.8474	9.2057	9.5321	11.0089	10.9295	13.2554	1.5418
TCGA-AF-A56L-01	01	Tumor	8.2118	10.8851	14.5145	0	3.9033	9.9915	11.6667	3.1578	13.0183	9.316	9.218	9.0469	11.4612	11.061	7.7454	6.4498	8.1727	5.0641	9.5846	3.0303	11.601	8.776	10.6596	6.8545	8.7125	9.487	10.3715	9.025	10.1769	8.5004	10.2132	6.034	9.9186	10.9332	6.7266	3.5676	5.9037	11.9424	8.8344	12.0226	10.3875	9.6648	8.8128	9.7165	10.8462	13.1696	1.0923
TCGA-DT-5265-01	01	Tumor	8.5833	9.8197	14.4908	0	3.7111	7.9715	11.2634	5.9183	13.5967	9.5665	9.2746	9.3414	12.0956	11.0662	7.9244	7.1964	11.4582	3.1802	9.6096	4.3686	10.5395	8.6464	8.6409	3.7656	7.9831	9.1135	9.137	9.1484	10.0158	6.7119	11.5422	1.8157	10.0207	10.9098	7.8633	3.2017	9.4462	11.0887	9.1056	12.275	10.2981	9.8694	9.4934	10.9988	10.8874	13.0696	1.0058
TCGA-F5-6465-01	01	Tumor	8.7533	10.9417	14.7892	0	5.3535	8.4842	10.9026	5.063	13.0861	8.392	9.8242	8.5474	10.2861	11.296	7.3762	7.0043	10.3632	2.6366	7.6708	4.0899	7.7678	6.8968	8.0123	4.657	8.3105	8.4691	10.2308	8.219	10.4638	6.8923	9.824	4.0253	10.1129	10.6958	8.0453	4.6373	5.8495	11.0778	8.7446	11.6708	9.7696	8.8246	9.6787	10.9354	11.296	12.5883	2.5474
TCGA-AH-6547-01	01	Tumor	9.3801	10.3981	14.9621	0	5.7055	8.5659	10.1111	3.3013	13.4761	8.4204	9.6606	9.1269	11.292	10.8013	7.5845	6.6568	9.9012	8.0778	9.621	8.4988	10.7266	8.5752	11.3833	4.5928	9.3424	8.7845	10.29	7.5943	10.2083	7.7421	10.3511	3.7861	10.7715	11.336	8.8005	7.8057	4.7593	11.2917	9.4149	11.3269	9.7025	9.2941	9.4044	9.9457	11.0595	12.976	2.6811
TCGA-F5-6811-01	01	Tumor	7.9769	10.5234	14.2938	0.5557	4.3411	9.2416	10.8025	4.1249	13.1782	9.0034	10.5702	9.6738	11.4195	10.9116	8.0375	7.066	9.0087	4.1249	7.936	3.1681	7.1779	6.5767	7.4656	3.8706	9.0126	8.5401	10.438	8.7152	10.9631	7.1351	11.7217	2.6251	10.4458	11.7019	8.1396	11.3328	6.4507	11.1188	9.7655	11.9348	9.4105	9.2916	9.9288	11.9393	11.4502	12.8349	1.2689
TCGA-F5-6571-01	01	Tumor	7.7533	10.6108	14.7763	0	5.6198	9.3728	11.2578	4.5032	13.4011	8.6762	9.5753	8.8786	10.9837	11.3469	7.6504	6.9025	9.9712	1.3817	6.3378	1.9298	5.6431	4.9022	4.7811	0.8503	8.0484	8.5342	10.2021	8.1945	10.1738	6.2492	10.0094	2.6366	10.3625	11.0489	7.6846	3.8026	5.1343	11.6923	9.4642	11.6144	10.0902	9.4033	9.2592	9.6281	11.0179	12.7757	1.5884
TCGA-AH-6903-01	01	Tumor	10.3733	10.0665	15.0917	0	3.5817	8.6932	10.3701	4.328	13.0996	8.2433	11.1334	8.3451	12.4343	11.7298	8.0398	6.9127	7.8015	4.7031	7.6034	5.7018	9.0246	6.8784	8.7229	3.914	9.7458	8.6005	10.9869	8.0255	10.5984	8.4002	10.9938	4.9004	10.4621	11.7072	7.1325	3.9351	5.2009	10.9522	9.4293	11.722	9.4143	9.7148	9.2028	8.7131	11.1625	13.5156	0.9666
TCGA-DC-6682-01	01	Tumor	8.636	11.0555	14.0082	0	4.3756	7.73	11.1086	3.2068	13.0859	8.8691	10.7523	9.0723	12.2456	11.0315	8.634	7.0759	7.4511	4.5548	8.552	3.7087	9.1314	5.7317	9.1759	5.6073	8.9859	8.2241	10.9393	7.4518	9.9908	6.4366	10.7175	3.825	11.0893	10.9296	6.7698	0.7954	8.7635	11.5908	9.5741	11.9848	8.8259	9.4474	8.9415	9.0273	11.3555	13.8741	1.0688
TCGA-AF-6672-01	01	Tumor	8.4306	10.3384	14.0805	0	3.3958	8.4812	11.3324	4.0608	13.9045	9.2584	9.7848	9.5596	11.1071	10.3663	7.2664	7.5209	7.8709	4.5492	8.0825	5.6527	8.1944	6.8066	8.2485	4.0115	9.222	8.5301	9.5798	7.4817	10.7636	8.0185	9.3928	2.8406	9.9446	10.6409	7.0517	4.707	3.6095	11.3519	8.1833	11.3758	10.077	9.5154	8.3486	9.5302	10.8636	12.9546	2.8406
TCGA-EI-7002-01	01	Tumor	8.2105	10.628	14.5969	0	4.5638	9.4082	10.8804	1.9894	13.5297	9.748	10.0969	10.1504	12.101	10.9678	7.338	6.8868	9.4631	0	5.986	0	5.1661	5.6656	5.2246	2.3462	8.5704	8.3168	10.0428	8.772	10.0695	8.6499	10.967	2.4478	9.8869	11.3069	7.1733	5.2492	5.3742	11.9156	8.7528	11.6121	10.101	10.0274	9.2358	10.6445	11.549	13.2551	1.08
TCGA-BM-6198-01	01	Tumor	9.051	10.8998	14.1204	0.617	5.1574	8.1077	10.6039	1.3791	14.0159	9.9899	9.8581	10.1533	11.5375	10.7129	7.4378	6.785	9.2738	4.0424	9.0187	4.5494	9.7513	6.312	7.3973	7.6482	8.7873	8.5716	9.972	8.9786	10.1788	6.5109	10.8667	5.0218	10.5447	11.1944	7.8978	9.0886	6.148	11.4823	9.4068	13.1308	9.4863	9.1383	9.8588	10.4937	10.3954	12.5509	2.8884
TCGA-F5-6864-01	01	Tumor	7.266	10.7942	14.6298	0.8131	3.627	9.3876	11.5249	4.5674	13.278	9.9459	9.2328	8.8764	11.2824	10.9804	7.8094	6.8199	11.1248	2.5657	7.1631	3.0341	7.5945	5.9962	5.5484	0.8131	8.2595	9.1858	9.8461	8.6977	10.2578	8.4713	10.4204	3.6706	10.2069	11.2987	7.9529	7.3684	5.3618	11.3431	8.9795	12.2573	9.9274	9.1871	9.7793	10.6453	11.4517	12.8364	2.2585
TCGA-EI-6881-01	01	Tumor	8.9863	10.6357	14.6162	0	5.1375	8.5368	11.0087	0.4244	13.6985	8.4538	9.0467	9.7518	11.5651	11.3975	7.2592	6.641	6.8738	3.7346	7.2942	3.3553	5.9433	4.6794	6.3096	1.4383	9.2177	8.3797	10.5118	8.6113	10.7804	6.9595	8.3827	4.9266	10.7621	11.5468	6.5177	4.9174	4.1779	11.5134	8.8507	12.1747	9.0639	9.4277	8.0199	10.5784	10.8714	12.9523	1.0186
TCGA-DC-5337-01	01	Tumor	9.2127	10.4161	14.4578	0	3.8542	8.5556	10.6079	0	13.7151	7.9301	11.0402	9.8618	12.9127	10.638	8.6831	7.1759	6.3236	4.5507	8.3049	2.5966	7.75	6.6235	7.9033	3.2348	10.1002	9.333	11.0993	8.9553	11.3414	7.6925	8.4554	6.0459	11.0105	11.6808	7.7687	5.8862	5.1834	11.6781	10.2399	12.4772	8.1397	9.8822	8.8237	9.9289	10.8972	13.7924	0
TCGA-G5-6235-01	01	Tumor	8.4889	10.1759	14.5975	0	3.781	8.5285	11.1595	0.9339	13.3151	8.8963	10.436	9.5609	12.1594	11.7582	8.1915	6.891	6.3175	6.6797	8.5339	7.3533	9.8435	8.0047	10.044	1.2423	8.498	8.3347	10.4895	8.9345	10.0954	6.9531	11.4475	5.1901	10.6526	11.6552	7.1509	4.4256	4.677	11.3961	9.6746	12.0826	9.0172	10.003	8.2638	8.1596	11.4017	13.2046	1.4962
TCGA-G5-6572-02	02	Tumor	8.694	10.1275	14.5532	0	2.6703	8.5066	10.3564	2.787	13.4635	8.5391	9.917	9.5895	10.6997	11.2429	7.5442	6.8131	9.1623	10.6904	13.7011	10.9453	12.8762	11.0858	13.6724	8.6866	9.1114	9.7071	9.6311	9.7135	10.5991	6.8823	11.5246	5.5425	11.8693	11.368	8.679	15.706	5.8003	10.9882	10.349	13.402	10.3335	8.8175	10.2591	9.6762	10.83	12.5607	9.7401
TCGA-DC-6681-01	01	Tumor	8.5999	10.5436	14.3282	0	2.885	9.11	11.109	3.5261	13.5748	8.1437	9.8662	9.5278	10.8596	10.7541	7.9879	6.4283	11.3597	6.7101	8.6179	6.3864	10.5194	8.4575	10.7756	7.7395	9.4076	8.9093	10.5083	8.5135	11.0588	8.0195	11.3942	5.4289	10.3897	11.1643	7.8792	4.6754	5.6284	11.6209	8.8796	12.208	9.4052	9.3766	9.673	10.3269	11.0643	13.1278	1.7023
TCGA-EI-6511-01	01	Tumor	9.397	9.995	13.7863	0.5072	6.5881	8.5895	11.3178	2.8717	13.6872	9.0497	9.6288	9.6134	12.1103	11.3175	7.0988	6.3776	8.4983	5.8336	7.8118	4.5952	7.0353	7.0167	7.5549	2.7861	9.5039	8.7134	10.3511	9.415	10.31	6.5561	10.1362	3.6776	10.8925	11.9407	8.0935	6.5775	7.4854	11.6613	9.0741	11.4823	9.1042	10.1255	10.0356	10.9288	11.0097	12.8986	0.8817
TCGA-F5-6464-01	01	Tumor	8.6886	10.2902	14.5305	0.5403	5.783	9.4374	11.2987	7.5489	13.5847	9.0896	8.5097	8.7169	10.8394	11.3755	7.3663	6.4088	11.8907	2.8797	8.6997	2.3473	7.3013	5.9192	5.759	1.2406	8.1818	8.4167	9.973	8.9832	9.8363	6.7758	11.7773	2.4707	10.7398	11.1561	8.5363	4.8734	9.2499	10.9522	8.977	11.2712	9.9433	9.2914	9.88	12.294	10.5774	12.7451	1.8976
TCGA-EI-6509-01	01	Tumor	8.7082	11.0194	14.7523	0	2.358	6.8361	11.2323	6.2516	13.7488	9.0489	8.7133	8.7176	11.0695	11.1319	8.3911	6.5416	8.5548	3.9273	9.377	4.3727	10.0172	7.7459	9.0401	2.2228	8.5318	8.2041	9.2814	9.4264	10.2781	6.6706	10.317	3.9701	10.3371	11.0732	6.9897	2.7714	6.8418	10.8684	8.2241	12.0859	10.0198	9.2025	8.6534	11.214	10.8206	13.0236	1.9073
TCGA-AH-6897-01	01	Tumor	9.0659	10.8419	14.5361	1.4635	4.6785	8.1227	10.8372	1.4635	13.2104	8.9224	10.1864	9.4366	12.341	10.6901	8.0059	5.9111	6.9817	5.6501	9.7052	5.4711	10.7644	8.8612	11.4286	7.1157	9.2549	8.5768	11.1926	9.0139	10.4134	8.4104	7.1578	5.6834	10.7522	11.7569	6.7102	6.6824	5.5634	11.3141	9.3303	11.6581	8.7693	10.043	8.067	10.3153	11.8743	13.6255	0
TCGA-EI-6508-01	01	Tumor	9.1756	10.7491	14.2492	0	3.2274	8.5782	10.8251	3.5744	13.4252	8.6762	8.8441	9.3949	10.9593	10.9009	8.2988	6.2525	9.1637	5.4805	7.6824	4.7059	9.8588	7.6824	9.1481	2.8447	8.6321	8.6161	9.6329	9.1013	9.9645	7.878	8.3219	5.3058	10.3271	11.0647	6.8252	5.041	5.3958	11.1441	8.3766	11.3858	9.4957	9.0199	9.3831	10.1059	11.3346	13.2345	1.8263
TCGA-AH-6544-01	01	Tumor	7.9626	10.7402	14.4983	0	2.7513	7.8356	11.1019	1.5416	14.1596	8.4879	10.2169	10.1836	11.9341	10.8485	8.0088	6.3755	7.6213	7.0117	8.9204	7.5347	10.0528	7.8947	10.0753	3.8929	9.0741	8.8873	10.3111	8.4562	10.1954	6.9956	9.9672	3.1118	10.9313	11.3995	6.7488	2.3408	3.1894	11.9554	8.9993	12.8866	8.9817	9.9748	7.8565	8.4833	11.1449	12.9036	0
TCGA-DY-A1H8-01	01	Tumor	9.4996	10.6718	12.4082	0	4.7883	9.7518	11.5839	0	13.7147	9.9009	10.8381	10.5875	12.6114	10.835	6.9018	7.3628	5.544	4.1282	8.695	2.6024	6.8151	5.8754	8.1162	5.5827	8.9382	9.7032	9.6518	8.6208	10.8489	8.2929	9.0563	4.6494	9.6461	9.7304	6.2203	2.6009	4.3236	11.9232	9.0563	11.9798	10.5738	9.6379	7.3348	7.9299	10.0389	13.2649	1.1815
TCGA-AF-2693-01	01	Tumor	8.1007	11.4604	14.4575	0	5.5238	7.1105	10.7513	3.8922	13.6546	8.9229	9.7725	9.1251	11.0488	10.7273	7.6381	6.5217	8.8117	4.6324	7.4966	5.9845	8.3678	6.5011	8.2373	2.6307	8.302	8.4557	10.1344	8.4416	9.7358	7.3702	10.7808	5.2885	11.0684	10.9107	7.1105	4.6044	7.3474	11.4315	9.4057	11.8705	8.8966	9.3385	8.8252	10.3216	11.0132	13.4244	0.8996
TCGA-AF-5654-11	11	Normol	9.2238	9.9978	14.827	0	2.9183	8.2504	10.1858	0	13.6465	8.2298	10.0373	9.3868	11.7386	10.9117	8.154	6.2277	9.5644	8.9609	10.2797	9.9995	11.8588	9.8246	12.15	6.2277	9.8425	8.6479	11.1583	7.1287	10.8422	8.178	9.8509	2.9183	11.493	11.8984	8.2074	9.0707	3.0278	12.0976	9.7813	12.3733	8.9046	8.5934	8.6241	7.3816	11.4262	13.704	0.6747
TCGA-CI-6622-01	01	Tumor	8.288	10.6971	14.7985	0.5098	3.4263	8.6465	10.7008	2.6057	13.5654	8.8581	10.0112	9.1043	11.4246	11.1832	7.7572	6.0689	7.7741	5.0353	7.5958	6.3115	8.7252	6.6828	8.5714	2.5016	8.8257	8.6767	10.5177	8.8209	10.4797	7.76	8.2544	4.9783	11.2275	11.302	7.1642	4.2485	5.3818	11.5952	9.431	11.8834	8.6094	9.2333	8.7425	10.0537	11.3061	13.4595	2.3893
TCGA-EI-6882-01	01	Tumor	9.6669	10.1677	14.4177	0	5.5986	6.2783	10.0949	3.6363	13.8475	8.2972	10.1675	7.5674	10.6766	10.9217	7.3163	6.96	7.9205	2.7479	7.785	3.6363	6.8355	5.6973	7.1807	4.5422	9.697	7.7042	10.6701	9.1848	10.1233	8.6421	10.0174	5.4742	10.9866	11.1267	7.4402	5.8272	7.0746	10.527	9.3365	11.4938	9.2552	8.82	9.0148	10.1409	10.6856	13.119	1.1
TCGA-AH-6643-11	11	Normol	9.2402	10.3246	14.4664	0	5.4475	8.7413	10.4264	4.9603	13.0424	8.4283	9.6311	9.1376	11.2068	10.6368	7.9983	6.7122	12.1409	9.3586	10.3994	10.0004	11.5529	10.0654	12.1207	4.1743	8.9629	8.997	10.4917	7.7099	10.4525	7.8987	11.9059	1.4359	10.2095	11.6292	9.1736	8.8081	3.7556	11.235	9.5535	11.7246	9.8863	8.706	9.1037	8.8989	11.2182	13.0752	2.9676
TCGA-DY-A1DC-01	01	Tumor	8.7389	10.8507	14.3603	0.5802	3.2351	8.6844	12.0344	2.8945	13.6642	9.2524	10.0368	10.5102	11.7981	10.7238	7.6652	6.052	7.8406	0.5802	7.2712	1.3134	6.0083	5.1759	5.8928	0.6086	8.6151	8.7882	10.2866	8.7995	10.8261	8.0785	9.7777	5.0946	10.1768	11.6094	7.0465	1.9268	6.9342	11.5551	9.6368	12.7454	9.0851	9.0532	9.7	10.2727	11.1752	13.1001	0.5802
TCGA-EI-6884-01	01	Tumor	8.8707	10.5758	14.698	0.5335	4.1701	8.2475	11.2313	2.8608	13.7844	9.497	9.0935	8.9616	11.1866	11.1255	7.582	6.6486	8.9847	6.4414	8.475	7.0454	9.7603	7.2071	9.5499	1.4801	8.4062	8.7043	10.2365	8.8671	10.2133	7.3124	9.8035	4.2401	10.7984	11.2645	7.7231	6.5439	4.4015	11.2801	8.8273	12.0583	9.8307	9.2141	9.2139	10.947	11.0967	12.8723	1.2279
TCGA-AF-5654-01	01	Tumor	9.4105	10.1972	14.8138	0	6.0388	8.0521	10.5823	2.2656	13.3403	9.305	10.2125	9.3016	13.088	11.7066	8.6914	6.4955	7.1266	3.4321	9.717	2.0923	5.8746	6.6124	9.6628	6.7206	10.2165	8.3551	11.0629	8.3318	10.8912	7.3207	10.6196	5.7634	10.5776	12.1896	6.1969	5.7839	7.1654	11.3042	9.4649	11.5317	9.4759	9.6113	7.7759	9.5203	11.1672	14.154	0.6268
TCGA-AG-3725-11	11	Normol	9.9417	10.3577	13.8572	0	4.2625	9.0375	10.459	5.2485	13.7723	8.1967	11.3107	10.4525	11.2367	10.4787	9.2983	7.9236	10.3	9.9213	11.6253	11.7738	13.2756	11.1277	13.5606	7.3648	9.5241	9.0932	10.5465	7.7623	11.4292	7.7393	11.2613	5.2	11.4256	11.6313	9.2124	8.8167	5.4688	11.416	9.9072	12.6814	8.7037	8.9017	8.6618	7.6693	10.9398	13.7054	1.8112
TCGA-AG-4021-01	01	Tumor	8.9777	9.9752	15.938	0.8022	4.1485	8.2126	10.7433	0.8022	13.7717	8.8014	9.942	9.7104	10.8103	11.244	7.3696	5.6248	9.5471	6.0461	8.6278	4.1179	9.1614	5.6464	8.2849	3.3111	8.5781	8.4627	10.8228	7.8985	10.1985	6.4959	10.3591	5.1977	10.8136	10.901	7.2372	2.7532	5.0916	11.3223	10.0353	12.41	9.3499	9.0303	9.3209	11.2028	11.2561	12.9791	1.5157
TCGA-CL-5917-01	01	Tumor	9.5524	9.99	14.4821	0	3.1629	7.8439	11.3431	1.9941	13.0894	8.8238	10.0595	9.4078	11.5763	12.7159	7.8155	6.2016	7.9376	0.996	7.6786	2.1638	9.5303	6.4351	7.9463	5.1008	9.3908	8.5695	10.2494	9.3833	10.0921	6.1007	11.4441	2.9931	10.3726	11.5117	6.1919	2.3526	6.0797	10.8543	9.3038	11.824	9.5029	9.6935	9.4699	10.4592	11.153	12.6689	1.8017
TCGA-AF-6136-01	01	Tumor	8.4049	10.6964	13.389	0	3.2919	7.0406	10.3699	1.8125	13.7405	8.9542	9.9677	9.095	11.3638	11.4686	7.425	7.2456	8.7033	3.9493	7.6716	5.3424	8.0212	6.0786	7.4819	0	8.7713	8.5449	10.2138	8.9397	10.7589	7.6492	8.9831	3.8269	10.4951	11.5473	6.3908	4.2524	5.5883	11.2227	8.9246	11.7451	8.9077	9.2742	8.2587	9.8493	10.8737	12.9504	1.5283
TCGA-AG-3742-01	01	Tumor	9.5223	10.3223	14.9561	0	3.6124	8.3963	11.325	3.1396	13.5717	9.4058	9.7971	8.9993	11.7935	11.1034	8.4457	7.0471	8.4737	3.875	7.827	1.9744	7.6802	6.1261	8.0185	3.875	8.5527	8.1582	10.6575	8.3884	9.8795	6.5284	10.4216	5.5057	11.4124	11.7371	7.2375	2.5943	5.2704	11.2244	9.6697	12.1818	10.1771	9.6094	9.1667	10.7598	11.0341	13.1001	2.5565
TCGA-DC-6155-01	01	Tumor	8.4476	10.2642	12.3926	5.698	0	10.7069	11.7462	1.9077	13.1333	10.3719	9.0331	10.6561	10.2397	7.2643	8.8729	5.5784	6.6249	8.7307	9.9677	6.7408	11.0348	8.1024	11.3398	9.7908	9.6222	11.7624	9.4051	10.6723	10.8759	8.6139	9.9111	1.2485	9.6272	10.6586	6.3608	8.3531	5.4019	13.6137	9.1213	13.4673	9.4484	9.3379	9.2798	10.3609	10.4595	12.7207	0
TCGA-F5-6814-01	01	Tumor	9.229	11.1565	14.8396	1.2753	8.7881	7.4483	11.4387	3.1965	13.5176	9.2485	9.857	9.2367	12.0983	10.6693	8.307	6.6552	9.1209	3.7849	8.7564	3.0183	9.0846	6.2398	9.1355	3.3042	10.1537	8.7144	10.8294	8.9835	10.0021	6.645	10.847	5.8176	10.7978	11.341	7.8346	9.508	6.3254	11.2257	9.3743	13.0328	9.7654	9.7303	9.1821	10.076	10.764	13.2244	1.6465
TCGA-F5-6702-01	01	Tumor	8.3214	10.7497	15.0228	0	5.3006	8.2546	11.386	5.8885	13.3868	8.4774	9.3155	8.9905	11.2538	12.0422	7.1099	6.391	10.6593	5.9085	8.3708	6.2974	9.0747	7.1271	8.9964	2.3591	8.6394	8.8309	10.0968	7.6665	10.5527	6.7268	11.0085	4.8417	10.1514	11.0588	8.0829	5.7655	6.2196	10.9719	9.3668	11.5975	10.0544	9.6034	10.9928	12.7631	10.7909	12.5509	2.1058
TCGA-CI-6623-01	01	Tumor	9.4588	10.6409	14.5727	0	3.2969	8.2156	11.1522	3.5785	13.6744	9.0248	9.6357	9.5987	11.3833	11.0409	7.9366	6.4745	7.145	0.7708	6.0204	2.1799	5.6257	4.6445	4.6445	0.4624	10.3111	8.5546	11.2254	8.2126	10.984	6.5307	11.092	5.9397	10.2042	12.3384	6.8417	2.3985	4.8171	11.3967	9.8534	12.3523	8.5999	9.6636	9.1598	10.4102	11.0188	13.2304	0
TCGA-AF-A56N-01	01	Tumor	8.8717	10.4547	15.0232	2.4457	3.8011	9.7835	10.7454	4.7266	13.3256	8.8567	10.1959	9.7914	12.0629	10.8044	7.5154	6.3455	9.0573	2.4457	7.2917	1.7766	5.7213	5.2708	6.8509	4.0326	8.6413	8.8364	10.4257	8.8205	10.6053	7.9141	9.033	5.2858	10.6847	10.7946	6.7352	5.7019	6.3192	11.3832	8.8592	11.9578	10.0165	9.8254	9.2517	10.8713	11.0556	12.768	1.7766
TCGA-G5-6641-01	01	Tumor	8.4811	10.6829	14.8026	0	2.8466	9.2969	11.4012	1.1626	13.9189	9.2237	10.3155	9.83	11.5824	9.8649	7.9097	7.3518	6.765	6.9058	9.6106	8.519	10.1916	9.8514	10.6368	6.5906	9.6174	9.0906	10.351	8.2302	11.3178	7.5485	8.1614	4.0247	10.7257	11.4871	7.3401	4.9192	6.4478	11.3981	9.4487	11.804	9.9595	9.0828	9.6615	7.4428	11.1455	12.9104	0
TCGA-AF-2690-01	01	Tumor	9.4736	10.2766	14.1944	0	6.4133	9.0573	11.2206	3.7041	13.3001	8.8628	10.1721	8.818	11.4255	11.1071	7.2772	6.7639	11.5954	3.3584	8.9494	6.3736	8.4472	6.6577	7.2111	5.5632	8.6766	8.9655	10.0895	8.6196	10.2088	6.5117	12.1918	2.9895	10.6054	10.6367	9.3714	7.4725	6.2297	11.5362	9.1729	11.5378	9.3885	10.0474	10.2082	10.5018	11.1177	12.858	2.4926
TCGA-F5-6861-01	01	Tumor	8.7635	10.6751	14.8022	0	3.0509	7.9739	10.9039	4.3836	13.2267	8.7415	9.7399	8.8938	11.8674	10.8366	7.9701	6.6617	9.1499	3.2143	7.828	2.7292	7.8572	5.4061	7.1508	0	9.8837	8.8644	10.6752	9.0559	10.6428	8.6551	8.5223	5.2264	10.94	11.3348	7.6203	2.9678	4.8325	11.5095	8.5	11.6284	9.4262	9.2195	8.1642	9.5429	11.1289	13.2583	1.8679
TCGA-AH-6549-01	01	Tumor	9.2326	10.9427	14.9871	0	4.137	8.4777	10.3322	1.6932	13.4577	8.4782	10.0758	8.712	11.9374	11.2766	7.907	6.6473	9.809	4.9688	9.1418	3.5274	8.9743	6.4923	9.5051	5.6295	9.3753	8.648	11.3349	7.9156	10.209	6.2477	11.3743	5.7962	10.4936	11.7537	7.0144	3.9084	9.2125	10.9698	9.8991	12.3512	9.4988	9.3764	9.5315	11.0278	10.5879	13.4689	1.6932
TCGA-EI-6510-01	01	Tumor	9.1776	10.3363	15.0951	0	3.316	8.9979	10.8212	1.4364	13.3954	9.6105	10.0428	9.5915	11.0297	10.5055	8.5949	6.7249	6.5998	6.9225	9.7846	8.7301	10.9342	9.7528	11.3927	7.9191	9.4358	8.5464	10.191	8.7837	10.8308	7.4933	7.9292	4.5872	10.3215	11.626	6.6919	2.8832	4.1751	11.1311	8.508	11.924	9.933	8.9138	8.6769	8.2187	11.6712	13.1658	1.8318
TCGA-AF-6655-01	01	Tumor	8.0297	10.3745	13.6718	0	5.218	8.5379	11.6359	1.4318	13.2365	8.7658	9.5934	9.3842	11.7383	11.1068	7.3016	6.1185	8.4636	1.7065	7.0414	3.5549	7.4491	4.5971	6.3261	1.4318	8.3729	8.5445	10.3472	8.5956	10.4818	7.3723	11.1923	4.1682	11.0327	11.1758	7.387	4.9079	6.7392	11.0825	9.0441	11.2531	9.6643	9.7647	9.6793	11.5081	10.8198	13.006	1.7065
TCGA-AH-6644-01	01	Tumor	8.0893	10.7723	15.0631	0	4.2794	7.5223	11.2048	5.9141	13.5779	9.2027	9.7346	8.3754	10.5521	11.0834	7.5945	6.5266	9.3605	1.4838	6.9342	2.9521	6.3312	4.828	5.4782	0.5353	8.5042	9.0418	9.6635	8.0243	9.8208	6.0861	10.0697	2.9521	10.7401	11.3314	7.104	6.6665	4.805	10.9492	8.3156	12.4967	9.8688	9.1087	9.4213	10.6737	10.8421	12.8712	2.1997
TCGA-DY-A1DG-01	01	Tumor	8.1271	11.5205	12.9192	0	1.9791	10.6088	11.5689	0	14.0035	9.3489	10.2986	10.3693	12.0646	10.2918	8.8564	6.5945	5.8055	7.2391	9.5296	7.0861	11.1155	9.6881	11.5246	6.9947	8.4879	9.7715	10.0291	8.7854	10.9419	8.9394	9.8948	6.4071	10.0049	10.0261	7.3774	0.9862	4.9272	11.4819	9.268	11.9374	9.7739	9.5316	7.9863	9.1804	11.0523	12.5355	0.5757
TCGA-DC-6158-01	01	Tumor	8.7375	10.3011	13.8718	0	5.6707	8.6571	11.2885	3.1972	13.1765	8.8061	8.8902	8.7283	12.0976	11.3722	7.1925	6.439	8.8582	5.3558	8.0609	6.3858	10.12	7.3413	9.3497	5.8403	8.9669	8.0972	10.1223	8.7375	10.5015	6.101	10.7222	4.6474	10.245	11.6363	8.3489	5.1397	6.4769	10.5292	8.7049	11.6819	9.9161	9.9841	9.9107	11.1911	10.9437	12.7244	2.0627
TCGA-CL-4957-01	01	Tumor	9.2014	10.4441	14.052	0	3.2248	8.0826	11.0027	0.4468	13.7226	8.8359	10.443	9.6915	11.9882	11.2987	7.9384	6.4272	8.3769	2.211	8.1761	2.0933	6.6505	6.0675	8.1188	5.524	9.1124	8.245	10.4838	9.2952	10.9073	6.5702	11.2542	6.485	10.7386	11.6633	6.2506	2.9211	3.3327	11.677	9.1916	11.7608	9.1853	9.725	9.0751	10.561	10.9041	13.6048	1.0628
TCGA-CL-5918-01	01	Tumor	8.571	10.4303	14.5201	0	3.1185	9.7166	11.7263	1.0689	13.8189	9.3455	10.0033	9.772	12.2839	11.5961	7.9796	7.1726	6.4368	2.1022	8.059	2.8152	9.8539	7.41	9.3488	7.3433	8.1949	9.1457	10.3447	8.8371	10.3592	7.189	10.5619	5.2395	10.0829	11.2796	6.9728	2.0147	6.7916	12.2891	9.7954	12.6051	9.567	9.7939	8.3016	9.0857	10.9916	13.0285	0
TCGA-CI-6621-01	01	Tumor	8.2669	10.87	14.5105	0	5.9021	7.9545	10.8543	3.5429	13.4834	9.2286	10.2187	9.2894	11.5362	11.2423	7.5791	6.656	8.5648	4.0348	7.7126	5.206	8.22	5.7934	7.9817	4.2595	9.1954	8.5738	10.4402	8.0188	10.4357	6.6159	10.9424	5.8733	10.8969	11.2164	7.8274	5.4113	4.7783	11.6041	9.0493	11.616	9.2271	9.4041	9.8568	11.4125	10.6927	13.1415	2.0556
TCGA-AG-3742-11	11	Normol	9.3748	10.1489	14.1078	0	4.3894	8.4884	10.4012	8.9764	13.419	7.6291	10.9275	9.6551	11.0451	10.4458	8.4992	7.6402	12.5125	9.7404	12.5977	11.0816	13.5155	11.047	13.6649	6.2268	9.4073	9.0706	10.645	7.3514	11.1885	6.9602	13.0973	4.5307	10.5553	11.7724	8.733	8.3695	4.426	11.098	9.9012	12.2057	9.4972	8.5848	9.405	8.1614	11.2655	13.5521	2.2557
TCGA-DC-4749-01	01	Tumor	8.9914	10.6351	14.1242	0.5282	3.5912	9.3245	10.7737	1.218	14.1706	9.146	10.1284	9.7999	12.0473	10.8703	8.4918	6.7488	6.6695	3.5373	7.5881	2.9319	7.3032	7.0234	6.6569	1.8689	9.0358	9.2489	11.1268	8.5882	10.8916	7.0036	9.8317	6.625	10.6586	11.9071	6.7248	3.3697	5.202	10.6379	9.8484	12.7329	9.2085	9.2118	10.1535	9.9094	10.9573	13.1251	0
TCGA-DC-6683-01	01	Tumor	8.2952	10.2606	14.5462	0	2.9439	9.0496	11.2427	3.3604	13.4317	9.2426	10.6704	9.6039	11.9578	11.7795	7.9342	6.382	8.7958	1.6135	6.7633	2.2032	5.9962	5.9845	6.042	1.0215	8.5641	8.1166	10.3702	7.4392	10.4024	6.8302	10.3234	5.2114	11.0138	11.5769	7.1138	9.4863	3.8977	11.194	9.4989	12.1721	9.5294	9.9039	9.2062	9.9052	11.5488	13.0117	1.0215
TCGA-DC-4745-01	01	Tumor	8.1466	10.4687	13.143	0	3.2732	8.7674	11.4964	2.885	13.5198	8.7181	10.5101	9.6211	11.8392	10.5323	8.481	7.3387	8.1811	3.2035	6.2182	3.1302	6.3611	4.5456	5.9466	1.4981	8.4847	8.6246	10.4804	9.8039	11.1107	6.3691	11.0412	4.3973	11.7372	11.4004	7.5338	0	6.1363	12.0391	9.3578	11.4023	8.6112	10.3431	9.289	10.0283	10.6216	13.5757	1.7141
TCGA-CI-6619-01	01	Tumor	8.7636	10.7112	14.4349	0	5.6292	7.4527	11.5655	4.292	13.4324	9.0311	9.9494	8.9174	11.3021	11.2786	7.7842	6.835	8.6822	5.5813	9.0209	5.6526	8.9707	7.8665	9.9304	5.4272	9.5986	8.72	10.7015	8.7337	10.1495	6.7934	9.2208	6.2357	10.4282	11.5691	7.3312	5.3282	7.5367	11.2295	8.833	12.0365	9.6633	8.8873	9.296	10.8889	10.8987	13.4082	1.1456
TCGA-DY-A1DE-01	01	Tumor	8.8156	10.9723	13.682	0.5756	4.6452	9.3554	11.3517	1.7871	13.5811	9.8901	9.9378	9.8234	13.0557	10.9236	7.2618	7.5679	9.7423	1.9787	6.9434	1.5661	5.6864	4.6452	5.7535	2.4362	8.8077	9.1265	10.6114	10.8812	11.2556	7.4394	10.2997	5.3985	10.8021	11.0534	7.3938	4.0208	8.8203	10.7966	9.6272	12.0569	9.5262	9.3432	8.5604	9.7046	10.9332	12.6371	0
TCGA-EI-6885-01	01	Tumor	9.0463	10.196	15.6322	0	6.0457	9.0908	12.7583	3.5787	13.2337	9.6681	9.207	9.0108	11.3282	11.547	7.6857	6.7587	9.2659	5.9321	8.0684	4.4149	7.7074	7.3154	9.3962	6.4011	9.378	9.1868	10.6907	9.3791	10.2589	7.0175	12.1807	5.1332	9.9713	10.8791	7.9747	4.1642	6.0525	10.4747	8.9336	12.2449	10.4753	9.1219	10.2992	11.4413	10.8082	13.1061	2.6594
TCGA-G5-6233-01	01	Tumor	9.0245	10.673	13.5534	0	4.1029	8.3554	11.2803	2.1149	13.4178	9.0973	9.8607	9.1385	11.7405	11.5471	8.2307	6.7305	8.427	5.8609	8.6174	7.0222	9.3987	7.3764	9.4007	2.526	9.0532	8.833	10.2453	10.4589	10.215	7.326	11.0876	5.0807	11.0177	10.6259	7.7779	0.5617	9.1422	11.408	9.6595	11.7885	9.2028	9.6535	8.5548	10.3687	10.5845	12.9263	0.5617
TCGA-AG-3732-11	11	Normol	8.9697	10.0463	14.5796	1.0802	3.6668	8.4202	10.4674	7.0253	12.9269	8.2468	10.153	8.563	10.9866	10.5554	8.3965	6.7389	13.1092	7.8029	9.47	9.1658	10.7425	9.2775	11.2692	4.5756	8.9697	8.6989	10.4718	7.6733	10.6693	6.614	13.236	1.9206	9.973	11.597	7.7993	8.9301	4.8228	10.906	9.1727	11.7456	9.9778	8.4686	10.2168	9.8052	11.09	13.2731	1.9206
TCGA-AG-3731-11	11	Normol	9.0858	10.3242	14.6622	0	4.1715	8.9154	10.5031	8.0059	13.5273	7.9079	10.3234	9.1146	11.3452	10.2867	8.2058	6.9927	11.6067	9.8556	11.633	11.043	12.4237	10.9118	13.3903	6.3296	9.3783	9.0848	10.5063	7.733	10.871	7.7487	11.9161	2.2576	10.7326	11.6936	8.8742	8.9661	5.1152	11.4937	9.2381	11.8684	9.716	9.0544	9.4681	8.2883	11.2714	13.3793	2.8179
TCGA-DC-6157-01	01	Tumor	8.8635	10.4292	14.6385	0	3.8573	8.5307	11.0606	3.5229	12.7851	9.2778	10.0748	8.5748	11.1231	11.824	7.515	6.9812	7.5189	2.8067	6.8002	2.6998	6.4087	5.5385	7.113	1.8069	9.4266	9.0761	10.4689	8.9002	10.1786	6.9122	10.734	3.2473	10.8246	11.6777	7.4002	8.6376	4.4912	11.1922	9.8873	11.7955	9.7929	9.2728	9.4065	9.5794	11.223	12.8332	0.5848
TCGA-DY-A1DF-01	01	Tumor	7.8536	10.1728	13.7805	0	1.7921	10.0118	11.6612	4.7475	14.4609	10.6057	8.4526	9.507	11.417	11.178	8.0373	7.304	11.0439	1.7921	7.5979	2.231	6.0503	6.2148	5.7537	4.0883	7.8574	9.5819	9.12	10.0025	10.0144	8.3896	9.7179	3.6667	8.9863	10.7628	7.7787	0	8.3218	11.5601	8.8524	12.6387	9.9176	9.5165	8.4518	9.0662	10.5547	11.8417	0
TCGA-F5-6813-01	01	Tumor	8.6227	10.9819	15.0006	0	3.9867	6.5146	9.8988	3.2835	14.1135	9.1431	9.826	9.4999	11.1801	10.8955	6.6209	6.7949	10.4123	1.2083	7.133	3.6275	6.9412	5.5904	4.9198	0.9587	8.0008	8.9756	10.2185	9.6115	10.6172	6.8293	10.8096	5.9064	11.3309	11.6983	7.5444	6.4046	5.0775	11.3052	9.547	12.5168	9.1915	9.2599	8.835	9.7056	10.9598	13.048	0.523
TCGA-AF-4110-01	01	Tumor	9.28	10.4743	14.2758	0	5.706	8.7092	10.9305	4.7669	13.8224	8.765	9.6693	8.7277	10.4616	10.7815	7.4409	6.7813	9.5385	6.571	9.1779	7.7674	9.9441	8.2402	10.5249	4.9529	8.5676	9.1528	9.6398	8.4635	10.1947	7.0949	10.0287	6.2065	10.6336	10.3927	7.6997	7.0649	7.0905	11.7139	8.9911	11.7497	9.4442	9.5199	9.5457	11.0946	10.7326	12.9386	1.4142
TCGA-EI-6514-01	01	Tumor	7.7218	10.4258	15.2799	0	3.3078	9.1087	11.0034	1.6896	13.1865	9.0737	10.0319	9.0469	11.3722	11.5481	7.9362	7.145	11.0079	0.9185	6.5955	1.8761	5.027	6.5551	5.3281	1.6896	8.0902	8.995	10.1349	7.522	10.2015	6.1743	10.4522	5.1406	9.4324	11.2979	6.968	3.2856	4.3635	11.3386	9.244	12.2311	9.48	9.9303	9.3433	9.4924	11.6702	12.508	0.5312
TCGA-EI-6513-01	01	Tumor	9.0349	10.7211	13.8112	0	4.7383	8.9681	11.6065	2.2906	13.5224	10.0632	9.9824	9.3723	12.2066	11.8633	7.3061	6.8432	7.9139	5.711	8.8107	6.2939	10.1148	7.9139	9.995	7.0548	8.711	8.6881	9.9605	9.6053	10.7115	6.3011	10.4163	5.6452	11.0083	11.4763	7.6319	1.1162	5.5038	10.5148	9.7398	12.0456	9.6364	9.6083	9.5647	10.3618	11.3212	13.2221	0.4744
TCGA-AF-2689-11	11	Normol	8.706	10.356	14.4689	0	4.5818	8.8089	10.4757	3.8532	13.5951	8.1281	9.695	9.2571	11.1888	10.2409	7.4089	6.7269	12.5351	8.969	10.6966	10.2508	11.9335	10.3221	11.9509	4.8427	9.2756	9.1446	10.3473	8.1194	10.5784	8.7518	11.8102	4.4832	10.4315	11.458	8.1411	8.4982	4.7182	11.765	9.3075	11.7597	9.562	9.0484	9.2681	9.5956	11.2139	13.5769	2.619
TCGA-AF-2687-01	01	Tumor	9.4229	11.0772	14.2648	0.5117	5.691	7.5373	10.9582	4.5321	12.9366	8.9283	9.7622	8.5515	11.4062	11.3384	7.4058	6.9127	10.9273	5.0598	9.6074	5.6053	7.9586	7.0175	9.2741	6.0097	9.8002	9.204	10.5125	8.0018	10.4677	7.1182	11.9551	6.0473	10.433	11.3011	9.0948	9.7217	6.3779	10.9872	9.0198	11.3765	10.1897	9.6505	10.081	11.6193	10.5497	13.1499	2.1394
TCGA-DY-A1DD-01	01	Tumor	8.8017	10.6669	13.2257	1.3234	1.8091	10.1604	12.1999	1.3234	13.8045	10.395	9.574	9.2468	11.6379	11.6762	8.2739	7.5402	10.5186	3.1721	7.8226	3.0896	5.9682	7.3644	9.2372	1.8091	8.1848	9.9191	9.3176	9.7671	9.9383	6.6023	10.5864	5.5722	9.3266	10.6467	7.2119	3.164	8.7756	11.6443	9.4412	11.4198	10.0123	10.0309	9.1188	9.34	10.8887	12.153	1.5866
TCGA-F5-6863-01	01	Tumor	8.0043	10.6834	14.6354	0	2.3474	8.5999	12.1652	4.2073	14.0597	10.0122	9.3415	9.9752	11.1554	11.7977	7.4663	7.0654	11.5663	3.0114	8.7457	2.8718	8.5916	6.305	8.0434	4.0862	7.8291	9.1495	9.872	9.3107	10.5056	7.4602	11.1764	2.5442	9.8082	10.9083	6.1169	4.6279	5.1825	11.5143	8.6367	11.8	10.3217	9.2407	9.1524	9.485	10.2148	12.7538	2.1196
TCGA-F5-6810-01	01	Tumor	8.9606	11.0485	14.7337	0.8013	4.6937	9.0165	11.0564	3.9175	13.7555	8.8377	9.3588	9.721	11.4095	11.0247	7.4464	6.3393	11.1648	5.181	8.1959	2.7952	8.2444	5.9432	8.0337	0.4555	8.8957	8.6841	10.631	9.1276	10.4832	7.6915	10.5194	4.975	10.5487	11.4903	7.0125	5.9132	5.9168	10.6058	9.5564	10.443	9.347	8.933	10.0523	11.6583	10.7812	12.7976	0.4555
TCGA-AG-3591-01	01	Tumor	9.2119	10.4114	13.7771	0	3.945	8.3648	11.1855	3.3586	14.158	8.9843	10.4368	9.5195	10.7429	10.6632	7.72	8.0258	7.8087	5.4492	9.5042	6.0174	11.0457	7.2979	10.6406	7.2884	8.496	8.0207	9.6701	8.957	10.6522	6.8669	9.7771	4.7941	10.889	10.2256	8.2155	4.1719	5.8855	11.5606	8.8576	12.3246	9.5415	9.3118	8.1827	9.5285	10.4688	13.5166	1.0205
TCGA-EI-6917-01	01	Tumor	9.4476	10.7498	14.2642	0.8068	6.762	7.7301	10.5093	5.9383	13.3185	9.1836	9.8354	8.579	11.6699	10.8586	8.5733	6.7768	9.6815	4.4082	8.4145	2.3565	6.1886	5.838	8.3662	1.0868	10.0784	8.9959	11.0149	6.8281	10.2918	7.2443	10.5927	5.2795	10.7706	11.3226	8.7731	8.1514	7.2407	11.2059	8.7595	12.3315	9.8591	8.9972	9.0044	10.9044	10.8256	13.1326	2.2469
TCGA-AF-2691-11	11	Normol	8.6332	10.2143	14.5859	0	5.1617	8.7227	10.5038	8.8107	13.7986	7.8536	9.9166	9.5282	11.3134	10.9909	7.1748	6.3923	12.2808	9.6455	10.8385	10.501	11.8794	10.0248	12.6488	6.4688	9.5858	8.8698	10.6442	7.8378	10.9035	8.4323	12.0722	4.0221	10.7254	11.6448	8.128	8.4558	4.8654	11.5061	9.6249	11.6556	9.2088	9.2403	9.3684	9.001	11.2041	13.6657	1.3583
TCGA-EI-6883-01	01	Tumor	7.2781	9.846	14.623	1.1366	4.4179	9.9287	12.096	2.4315	13.5438	9.7845	9.2911	8.8216	11.2785	11.1615	8.7132	6.9824	8.2938	3.1684	7.7678	3.3489	6.3594	7.3646	8.0151	5.4111	8.0328	9.5269	9.9912	9.3647	10.119	7.5757	9.7904	2.0691	10.7653	11.2096	7.4229	1.7643	8.5598	12.4913	8.9669	12.5934	9.0454	9.8294	8.7946	8.6812	11.1801	13.4594	1.9247
TCGA-AG-4022-01	01	Tumor	8.5082	10.2882	14.4931	0	5.303	8.8827	10.843	3.4236	13.3145	8.9318	9.9046	8.9423	11.2141	12.2062	8.1921	7.3154	9.4599	6.3642	8.4529	6.6126	8.997	7.8096	9.6843	3.5379	8.8962	8.9883	10.0782	8.7501	9.9621	6.5595	10.0538	4.6875	10.315	11.5094	7.7486	5.3469	6.8132	10.9359	9.3498	11.5612	9.5366	9.6511	9.5681	10.4004	11.0195	12.5793	2.8464
TCGA-AG-3732-01	01	Tumor	8.4007	10.9985	14.6077	0	4.3576	8.1076	11.127	3.1226	13.321	9.607	9.7862	8.2325	10.3131	10.5375	7.3797	7.0201	9.3291	7.7147	8.3374	6.0111	9.77	8.0813	10.0948	4.5374	7.9967	8.6161	9.3372	9.3595	9.241	7.8256	9.1506	0.9313	10.3274	10.8376	7.4336	7.7211	7.6608	10.756	8.9939	12.2669	9.9763	8.9337	8.9188	8.1702	11.4777	11.8608	2.8776
TCGA-CI-6620-01	01	Tumor	9.0039	11.0122	14.4043	0	3.2658	8.1998	11.0876	4.5196	13.6351	8.9833	9.8419	9.4141	11.9376	11.1404	7.1178	5.8413	9.4387	3.7163	7.5655	4.3359	8.4203	5.7829	8.4578	4.7886	8.7454	7.7864	11.4276	8.4125	10.9234	6.2144	10.5112	5.2853	11.0688	11.5018	7.0932	4.9107	5.9105	11.2375	8.9305	11.877	9.1769	9.3056	8.8335	10.6818	10.9039	13.399	1.1211
TCGA-AG-3725-01	01	Tumor	8.8601	11.0124	14.068	0.5082	6.507	8.2348	10.5493	1.4272	13.79	9.3458	8.9393	9.5494	11.9593	10.4673	6.8351	6.8706	7.8017	4.2599	7.9471	5.155	8.1959	6.1518	8.0146	3.477	8.7985	8.8522	10.469	8.805	10.6798	7.7658	9.3824	4.0915	10.9204	11.8552	7.3979	3.6703	6.1346	11.0241	9.1986	11.8706	9.1767	9.329	8.1644	9.0638	10.4348	12.9553	1.1807
TCGA-AH-6643-01	01	Tumor	8.3568	10.5377	14.9829	0	3.6437	7.7003	10.8079	4.978	13.9389	9.6018	9.7058	9.2775	11.1539	11.4644	7.4678	6.8285	8.8745	2.0341	6.3407	1.4694	5.1674	4.2242	4.2242	0	8.4582	8.2094	10.032	8.005	9.9678	5.9549	11.109	3.4818	10.4579	11.3651	6.5113	7.3969	6.3328	11.0156	8.1833	11.6241	9.7773	9.5008	8.5564	10.5594	10.9925	13.1718	3.0906
TCGA-DY-A0XA-01	01	Tumor	8.7607	10.6398	14.1725	0	3.014	9.5934	11.5348	1.5956	13.1116	10.2967	10.4074	9.0753	11.3499	10.9752	7.8924	7.3512	7.9137	3.1015	7.3378	4.4075	7.2106	6.5549	6.73	2.012	8.2756	8.8786	10.3986	8.1096	9.7207	8.9831	10.9168	4.5071	10.4635	10.6	7.0602	3.4501	4.015	11.08	9.5493	11.6937	9.9145	9.2632	10.0994	9.4221	11.2082	12.9129	1.008
TCGA-AF-3400-11	11	Normol	8.7576	10.5129	14.6525	0	3.4438	8.423	10.6961	1.725	13.8679	8.0572	10.348	9.0245	11.7935	10.9464	8.1939	6.0903	9.5659	7.5553	9.6067	8.2897	11.6904	9.3411	11.4813	2.6485	9.9351	8.8168	10.9209	7.927	10.8403	8.3419	9.6152	2.4883	11.0762	11.7399	7.8736	8.0546	2.5706	12.1339	9.7299	11.8097	8.7902	9.4468	8.66	7.1561	11.3	13.7264	1.2126
TCGA-EI-6506-01	01	Tumor	8.6314	10.6958	14.3784	0	6.0376	8.5465	10.7896	3.1422	13.7571	8.9616	9.6972	9.0601	11.3885	11.0101	7.4536	6.1502	8.9811	6.4033	8.5857	7.5864	9.3669	8.1248	9.7805	3.2709	9.4077	8.9013	10.5048	8.4786	10.4071	7.3734	9.5285	2.3563	11.0589	11.2936	7.497	5.9435	3.55	11.5783	9.0942	11.4136	9.6724	9.295	8.9998	10.9144	10.8925	13.1118	1.7959
TCGA-AF-2692-11	11	Normol	8.7573	10.0718	14.5426	0	4.5983	8.6221	10.5249	6.8761	13.4232	8.2216	10.0497	9.1916	11.3547	10.2902	7.5233	6.4919	13.0853	7.6424	9.7521	9.5523	11.215	9.1012	11.2807	6.7017	9.4207	8.9686	10.6431	8.0102	10.5357	8.1528	12.7562	4.0428	10.3164	11.7256	8.1758	8.8026	4.8121	11.3493	9.2166	11.6994	9.8858	9.0672	9.7397	9.3997	11.1688	13.4539	3.1278
TCGA-AF-A56K-01	01	Tumor	8.3747	10.4059	13.9166	0	4.0687	9.705	10.5405	4.2843	12.9716	9.7241	10.0235	9.0159	11.5708	11.7298	7.5726	6.7823	9.0977	3.038	7.9857	3.5071	7.4954	6.1102	6.5937	2.8703	8.5253	8.8067	9.7839	8.9131	9.7956	8.0237	10.4414	5.362	10.0761	11.2404	7.4736	3.3616	6.3363	11.4917	8.6275	11.0838	10.0911	9.8341	9.5907	11.5865	11.1615	12.6006	3.038
TCGA-DC-6154-01	01	Tumor	8.8888	11.0845	14.8441	0	3.2502	10.0127	11.5585	2.3944	13.2984	9.3782	10.3355	9.4809	12.1779	11.4916	7.8243	7.0365	8.8862	1.8297	7.8243	3.8277	7.67	7.1051	7.8802	1.8297	8.9816	9.5391	10.159	8.5718	10.166	6.9938	9.6487	5.0963	9.8351	11.0571	7.4801	7.4267	5.8698	11.795	9.5862	12.3259	10.1946	10.5796	9.1576	10.4499	11.6711	12.429	2.3944
TCGA-AG-3592-01	01	Tumor	8.1688	11.1563	14.1503	0.401	5.1278	8.4654	11.0133	2.2765	13.3931	9.253	10.0764	9.5349	12.1506	11.2117	7.327	6.7636	7.7484	2.8891	7.3183	3.222	6.789	5.205	6.2414	2.8253	9.3777	8.7146	10.7831	9.0555	10.9425	6.6939	10.5796	5.4988	10.9119	12.0016	7.5232	2.8747	3.9163	11.3925	9.7722	12.1627	9.0296	9.9842	9.4322	10.7655	10.7148	13.1019	1.5472
[truncated: 14 more columns]

## Sheet: 临床
sample	OS.time	OS
TCGA-3L-AA1B-01	475	0
TCGA-4N-A93T-01	146	0
TCGA-4T-AA8H-01	385	0
TCGA-5M-AAT4-01	49	1
TCGA-5M-AAT6-01	290	1
TCGA-5M-AATE-01	1200	0
TCGA-A6-2670-01	775	0
TCGA-A6-2671-01	1331	1
TCGA-A6-2672-01	1419	0
TCGA-A6-2674-01	1331	0
TCGA-A6-2675-01	1321	0
TCGA-A6-2676-01	1305	1
TCGA-A6-2677-01	740	1
TCGA-A6-2678-01	1286	0
TCGA-A6-2679-01	1366	0
TCGA-A6-2680-01	1068	0
TCGA-A6-2681-01	1387	0
TCGA-A6-2682-01	424	1
TCGA-A6-2683-01	504	1
TCGA-A6-2684-01	1127	0
TCGA-A6-2685-01	1133	0
TCGA-A6-2686-01	1126	1
TCGA-A6-3807-01	1054	0
TCGA-A6-3808-01	1014	0
TCGA-A6-3809-01	996	0
TCGA-A6-3810-01	1111	0
TCGA-A6-4105-01	442	1
TCGA-A6-4107-01	987	0
TCGA-A6-5656-01	1001	0
TCGA-A6-5657-01	962	0
TCGA-A6-5659-01	926	0
TCGA-A6-5660-01	888	0
TCGA-A6-5661-01	1020	0
TCGA-A6-5662-01	718	0
TCGA-A6-5664-01	672	0
TCGA-A6-5665-01	671	0
TCGA-A6-5666-01	995	0
TCGA-A6-5667-01	887	0
TCGA-A6-6137-01	824	0
TCGA-A6-6138-01	685	0
TCGA-A6-6140-01	734	0
TCGA-A6-6141-01	255	0
TCGA-A6-6142-01	763	0
TCGA-A6-6648-01	766	0
TCGA-A6-6649-01	735	0
TCGA-A6-6650-01	627	0
TCGA-A6-6651-01	662	0
TCGA-A6-6652-01	751	0
TCGA-A6-6653-01	742	0
TCGA-A6-6654-01	726	0
TCGA-A6-6780-01	612	0
TCGA-A6-6781-01	598	0
TCGA-A6-6782-01	617	0
TCGA-A6-A565-01	494	1
TCGA-A6-A566-01	758	1
TCGA-A6-A567-01	1881	1
TCGA-A6-A56B-01	1711	1
TCGA-A6-A5ZU-01	293	0
TCGA-AA-3488-01	153	1
TCGA-AA-3489-01	214	1
TCGA-AA-3492-01	92	1
TCGA-AA-3494-01	31	0
TCGA-AA-3495-01	1127	0
TCGA-AA-3496-01	31	0
TCGA-AA-3502-01	1065	0
TCGA-AA-3506-01	1765	0
TCGA-AA-3509-01	1915	0
TCGA-AA-3510-01	1946	0
TCGA-AA-3511-01	212	0
TCGA-AA-3514-01	31	0
TCGA-AA-3516-01	396	1
TCGA-AA-3517-01	1186	0
TCGA-AA-3518-01	31	0
TCGA-AA-3519-01	276	0
TCGA-AA-3520-01	731	0
TCGA-AA-3521-01		0
TCGA-AA-3522-01	1127	0
TCGA-AA-3524-01	1096	0
TCGA-AA-3525-01	245	0
TCGA-AA-3526-01	580	0
TCGA-AA-3527-01	0	0
TCGA-AA-3529-01	0	1
TCGA-AA-3530-01	580	0
TCGA-AA-3531-01	1035	0
TCGA-AA-3532-01	882	0
TCGA-AA-3534-01	882	0
TCGA-AA-3538-01	791	0
TCGA-AA-3542-01	395	0
TCGA-AA-3543-01	30	0
TCGA-AA-3544-01	426	0
TCGA-AA-3548-01	1034	0
TCGA-AA-3549-01	639	0
TCGA-AA-3552-01	396	1
TCGA-AA-3553-01	730	0
TCGA-AA-3554-01	546	0
TCGA-AA-3555-01	911	0
TCGA-AA-3556-01	700	0
TCGA-AA-3558-01	638	0
TCGA-AA-3560-01	608	0
TCGA-AA-3561-01	424	0
TCGA-AA-3562-01	608	0
TCGA-AA-3655-01	1856	0
TCGA-AA-3660-01	2375	0
TCGA-AA-3662-01	184	0
TCGA-AA-3663-01	212	0
TCGA-AA-3664-01	1643	0
TCGA-AA-3666-01	61	1
TCGA-AA-3667-01	426	0
TCGA-AA-3672-01	28	0
TCGA-AA-3673-01	1522	0
TCGA-AA-3675-01	1431	0
TCGA-AA-3678-01	1430	0
TCGA-AA-3679-01	457	0
TCGA-AA-3680-01	335	1
TCGA-AA-3681-01	182	0
TCGA-AA-3684-01	0	0
TCGA-AA-3685-01	1127	0
TCGA-AA-3688-01	578	0
TCGA-AA-3692-01	1095	1
TCGA-AA-3693-01	0	0
TCGA-AA-3695-01	0	0
TCGA-AA-3696-01	153	1
TCGA-AA-3697-01	2587	0
TCGA-AA-3710-01	821	0
TCGA-AA-3712-01	0	0
TCGA-AA-3713-01	579	0
TCGA-AA-3715-01	579	1
TCGA-AA-3811-01	306	1
TCGA-AA-3812-01	1066	0
TCGA-AA-3814-01	0	0
TCGA-AA-3815-01	1005	0
TCGA-AA-3818-01	30	1
TCGA-AA-3819-01	761	0
TCGA-AA-3821-01	31	0
TCGA-AA-3831-01	547	0
TCGA-AA-3833-01	485	0
TCGA-AA-3837-01	1186	0
TCGA-AA-3841-01	1124	0
TCGA-AA-3842-01	1126	0
TCGA-AA-3844-01	454	0
TCGA-AA-3845-01	0	1
TCGA-AA-3846-01	518	0
TCGA-AA-3848-01	306	1
TCGA-AA-3850-01	0	1
TCGA-AA-3851-01	1006	0
TCGA-AA-3852-01	0	1
TCGA-AA-3854-01	1096	0
TCGA-AA-3855-01	975	0
TCGA-AA-3856-01	30	0
TCGA-AA-3858-01	945	0
TCGA-AA-3860-01	945	0
TCGA-AA-3861-01	914	0
TCGA-AA-3862-01	914	0
TCGA-AA-3864-01	1612	0
TCGA-AA-3866-01	518	0
TCGA-AA-3867-01	731	0
TCGA-AA-3869-01	822	1
TCGA-AA-3870-01	912	0
TCGA-AA-3872-01	0	0
TCGA-AA-3875-01	549	0
TCGA-AA-3877-01	943	0
TCGA-AA-3930-01	61	1
TCGA-AA-3939-01	395	0
TCGA-AA-3941-01	730	0
TCGA-AA-3947-01	1004	0
TCGA-AA-3949-01	791	0
TCGA-AA-3950-01	730	0
TCGA-AA-3952-01	61	1
TCGA-AA-3955-01	638	0
TCGA-AA-3956-01	1035	0
TCGA-AA-3966-01	61	0
TCGA-AA-3968-01	669	0
TCGA-AA-3970-01	1096	0
TCGA-AA-3971-01	489	0
TCGA-AA-3972-01	1551	0
TCGA-AA-3973-01	397	0
TCGA-AA-3975-01	1036	0
TCGA-AA-3976-01	791	0
TCGA-AA-3977-01	761	0
TCGA-AA-3979-01	730	0
TCGA-AA-3980-01	822	0
TCGA-AA-3982-01	822	0
TCGA-AA-3984-01	0	0
TCGA-AA-3986-01	580	0
TCGA-AA-3989-01	242	1
TCGA-AA-3994-01	822	0
TCGA-AA-A004-01	424	0
TCGA-AA-A00A-01	1157	0
TCGA-AA-A00D-01	578	0
TCGA-AA-A00E-01	913	0
TCGA-AA-A00F-01	1035	0
TCGA-AA-A00J-01	549	0
TCGA-AA-A00K-01	549	0
TCGA-AA-A00L-01	1157	0
TCGA-AA-A00N-01	122	1
TCGA-AA-A00O-01	822	0
TCGA-AA-A00Q-01	1278	0
TCGA-AA-A00R-01	30	0
TCGA-AA-A00U-01	518	0
TCGA-AA-A00W-01	456	0
TCGA-AA-A00Z-01	669	0
TCGA-AA-A010-01	1064	0
TCGA-AA-A017-01	457	0
TCGA-AA-A01C-01	457	0
TCGA-AA-A01D-01	334	1
TCGA-AA-A01F-01	974	0
TCGA-AA-A01G-01	365	0
TCGA-AA-A01I-01	943	0
TCGA-AA-A01K-01	943	0
TCGA-AA-A01P-01	1158	1
TCGA-AA-A01Q-01	31	0
TCGA-AA-A01R-01	1065	0
TCGA-AA-A01S-01	31	0
TCGA-AA-A01T-01	1005	0
TCGA-AA-A01V-01	31	0
TCGA-AA-A01X-01	791	0
TCGA-AA-A01Z-01	1126	0
TCGA-AA-A022-01	0	0
TCGA-AA-A024-01	1188	1
TCGA-AA-A029-01	1581	0
TCGA-AA-A02E-01	90	1
TCGA-AA-A02F-01	1216	0
TCGA-AA-A02H-01	61	1
TCGA-AA-A02J-01	153	1
TCGA-AA-A02K-01	426	1
TCGA-AA-A02O-01	28	0
TCGA-AA-A02R-01	670	1
TCGA-AA-A02W-01	1247	0
TCGA-AA-A02Y-01	1216	0
TCGA-AA-A03F-01	549	1
TCGA-AA-A03J-01	1246	0
TCGA-AD-5900-01	370	0
TCGA-AD-6548-01	650	0
TCGA-AD-6888-01	472	1
TCGA-AD-6889-01	2532	1
TCGA-AD-6890-01	746	0
TCGA-AD-6895-01	763	0
TCGA-AD-6899-01	176	1
TCGA-AD-6901-01	682	1
TCGA-AD-6963-01	834	0
TCGA-AD-6964-01	331	1
TCGA-AD-6965-01	805	0
TCGA-AD-A5EJ-01	0	0
TCGA-AD-A5EK-01	500	0
TCGA-AM-5820-01	14	0
TCGA-AM-5821-01	28	0
TCGA-AU-3779-01	441	0
TCGA-AU-6004-01	824	0
TCGA-AY-4070-01	496	1
TCGA-AY-4071-01	29	1
TCGA-AY-5543-01	1004	0
TCGA-AY-6196-01	6	0
TCGA-AY-6197-01	652	0
TCGA-AY-6386-01	542	0
TCGA-AY-A54L-01	525	0
TCGA-AY-A69D-01	543	0
TCGA-AY-A71X-01	588	0
TCGA-AY-A8YK-01	573	0
TCGA-AZ-4308-01	3324	0
TCGA-AZ-4313-01	2310	0
TCGA-AZ-4315-01	1776	0
TCGA-AZ-4323-01	43	1
TCGA-AZ-4614-01	172	1
TCGA-AZ-4615-01	1002	0
TCGA-AZ-4616-01	156	1
TCGA-AZ-4681-01	3247	0
TCGA-AZ-4682-01	680	1
TCGA-AZ-4684-01	1977	0
TCGA-AZ-5403-01	1910	1
TCGA-AZ-5407-01	2683	0
TCGA-AZ-6598-01	1503	1
TCGA-AZ-6599-01	206	1
TCGA-AZ-6600-01	368	1
TCGA-AZ-6601-01	3042	1
TCGA-AZ-6603-01	899	1
TCGA-AZ-6605-01	159	1
TCGA-AZ-6606-01	357	1
TCGA-AZ-6607-01	97	1
TCGA-AZ-6608-01	59	1
TCGA-CA-5254-01	386	0
TCGA-CA-5255-01	376	0
TCGA-CA-5256-01	379	0
TCGA-CA-5796-01	377	0
TCGA-CA-5797-01	383	0
TCGA-CA-6715-01	383	0
TCGA-CA-6716-01	371	0
TCGA-CA-6717-01	388	0
TCGA-CA-6718-01	306	1
TCGA-CA-6719-01	435	0
TCGA-CK-4947-01	534	0
TCGA-CK-4948-01	4502	0
TCGA-CK-4950-01	2599	0
TCGA-CK-4951-01	2134	1
TCGA-CK-4952-01	475	0
TCGA-CK-5912-01	1493	1
TCGA-CK-5913-01	1561	0
TCGA-CK-5914-01	669	0
TCGA-CK-5915-01	0	0
TCGA-CK-5916-01	643	1
TCGA-CK-6746-01	0	0
TCGA-CK-6747-01	2523	0
TCGA-CK-6748-01	61	0
TCGA-CK-6751-01	3780	0
TCGA-CM-4743-01	701	0
TCGA-CM-4744-01	609	0
TCGA-CM-4746-01	1126	0
TCGA-CM-4747-01	761	0
TCGA-CM-4748-01	792	0
TCGA-CM-4750-01	244	0
TCGA-CM-4751-01	822	0
TCGA-CM-4752-01	396	0
TCGA-CM-5341-01	884	0
TCGA-CM-5344-01	670	0
TCGA-CM-5348-01	699	0
TCGA-CM-5349-01	915	0
TCGA-CM-5860-01	974	0
TCGA-CM-5861-01	457	0
TCGA-CM-5862-01	153	1
TCGA-CM-5863-01	457	0
TCGA-CM-5864-01	457	0
TCGA-CM-5868-01	518	0
TCGA-CM-6161-01	457	0
TCGA-CM-6162-01	365	0
TCGA-CM-6163-01	427	0
TCGA-CM-6164-01	883	0
TCGA-CM-6165-01	488	0
TCGA-CM-6166-01	669	0
TCGA-CM-6167-01	456	0
TCGA-CM-6168-01	395	0
TCGA-CM-6169-01	396	0
TCGA-CM-6170-01	457	0
TCGA-CM-6171-01	427	0
TCGA-CM-6172-01	335	0
TCGA-CM-6674-01	394	0
TCGA-CM-6675-01	397	0
TCGA-CM-6676-01	337	0
TCGA-CM-6677-01	337	0
TCGA-CM-6678-01	335	0
TCGA-CM-6679-01	306	0
TCGA-CM-6680-01	366	0
TCGA-D5-5537-01	1381	1
TCGA-D5-5538-01	1661	1
TCGA-D5-5539-01	596	0
TCGA-D5-5540-01	1706	0
TCGA-D5-5541-01	1701	0
TCGA-D5-6529-01	614	0
TCGA-D5-6530-01	621	0
TCGA-D5-6531-01	540	0
TCGA-D5-6532-01	555	0
TCGA-D5-6533-01	775	0
TCGA-D5-6534-01	1316	0
TCGA-D5-6535-01	460	0
TCGA-D5-6536-01	543	0
TCGA-D5-6537-01	146	1
TCGA-D5-6538-01	521	0
TCGA-D5-6539-01	380	0
TCGA-D5-6540-01	491	0
TCGA-D5-6541-01	474	0
TCGA-D5-6898-01	229	0
TCGA-D5-6920-01	377	0
TCGA-D5-6922-01	308	0
TCGA-D5-6923-01	378	0
TCGA-D5-6924-01	435	0
TCGA-D5-6926-01	275	0
TCGA-D5-6927-01	287	0
TCGA-D5-6928-01	354	0
TCGA-D5-6929-01	408	0
TCGA-D5-6930-01	406	0
TCGA-D5-6931-01	365	0
TCGA-D5-6932-01	346	0
TCGA-D5-7000-01	312	0
TCGA-DM-A0X9-01	3641	0
TCGA-DM-A0XD-01	743	1
TCGA-DM-A0XF-01	1162	1
TCGA-DM-A1D0-01	3974	0
TCGA-DM-A1D4-01	2821	1
TCGA-DM-A1D6-01	1518	1
TCGA-DM-A1D7-01	405	1
TCGA-DM-A1D8-01	383	1
TCGA-DM-A1D9-01	4270	0
TCGA-DM-A1DA-01	228	1
TCGA-DM-A1DB-01	1348	1
TCGA-DM-A1HA-01	4000	0
TCGA-DM-A1HB-01	4126	0
TCGA-DM-A280-01	236	1
TCGA-DM-A282-01	4233	0
TCGA-DM-A285-01	179	1
TCGA-DM-A288-01	427	1
TCGA-DM-A28A-01	805	1
TCGA-DM-A28C-01	2475	1
TCGA-DM-A28E-01	3648	0
TCGA-DM-A28F-01	1094	1
TCGA-DM-A28G-01	1849	1
TCGA-DM-A28H-01	3561	0
TCGA-DM-A28K-01	2988	0
TCGA-DM-A28M-01	2895	0
TCGA-F4-6459-01	262	1
TCGA-F4-6460-01	972	1
TCGA-F4-6461-01	338	1
TCGA-F4-6463-01	1087	0
TCGA-F4-6569-01	1087	0
TCGA-F4-6570-01	188	1
TCGA-F4-6703-01	1456	0
TCGA-F4-6704-01	47	0
TCGA-F4-6805-01	1047	0
TCGA-F4-6806-01	1260	0
TCGA-F4-6807-01	1309	0
TCGA-F4-6808-01	1024	0
TCGA-F4-6809-01	403	1
TCGA-F4-6854-01	16	0
TCGA-F4-6855-01	1442	0
TCGA-F4-6856-01	1074	0
TCGA-G4-6293-01	4051	0
TCGA-G4-6294-01	858	1
TCGA-G4-6295-01	254	0
TCGA-G4-6297-01	2506	0
TCGA-G4-6298-01	715	1
TCGA-G4-6299-01	2268	0
TCGA-G4-6302-01	2047	1
TCGA-G4-6303-01	2003	1
TCGA-G4-6304-01	1631	0
TCGA-G4-6306-01	1359	0
TCGA-G4-6307-01	1674	0
TCGA-G4-6309-01	2600	0
TCGA-G4-6310-01	1935	0
TCGA-G4-6311-01	1199	0
TCGA-G4-6314-01	1093	0
TCGA-G4-6315-01	1883	0
TCGA-G4-6317-02	1095	0
TCGA-G4-6317-01	1095	0
TCGA-G4-6320-01	804	0
TCGA-G4-6321-01	672	0
TCGA-G4-6322-01	792	0
TCGA-G4-6323-01	419	0
TCGA-G4-6586-01	1089	0
TCGA-G4-6588-01	796	0
TCGA-G4-6625-01	2792	0
TCGA-G4-6626-01	1422	1
TCGA-G4-6627-01	2275	0
TCGA-G4-6628-01	2424	0
TCGA-NH-A50T-01	553	0
TCGA-NH-A50U-01	334	1
TCGA-NH-A50V-01	588	0
TCGA-NH-A5IV-01	588	0
TCGA-NH-A6GA-01	302	1
TCGA-NH-A6GB-01	476	0
TCGA-NH-A6GC-01	389	0
TCGA-NH-A8F7-06	543	0
TCGA-NH-A8F7-01	543	0
TCGA-NH-A8F8-01	511	1
TCGA-QG-A5YV-01	1301	0
TCGA-QG-A5YW-01	896	0
TCGA-QG-A5YX-01	1003	0
TCGA-QG-A5Z1-01	256	1
TCGA-QG-A5Z2-01	952	0
TCGA-QL-A97D-01	666	0
TCGA-RU-A8FL-01	1177	0
TCGA-SS-A7HO-01	1829	0
TCGA-T9-A92H-01	362	0
TCGA-WS-AB45-01	2130	0
TCGA-AF-2687-01	1427	0
TCGA-AF-2689-01	1201	1
TCGA-AF-2690-01	524	1
TCGA-AF-2691-01	1309	0
TCGA-AF-2692-01	412	0
TCGA-AF-2693-01	1155	0
TCGA-AF-3400-01	1049	0
TCGA-AF-3911-01	1148	0
TCGA-AF-3913-01	316	1
TCGA-AF-4110-01	912	0
TCGA-AF-5654-01	512	1
TCGA-AF-6136-01	741	0
TCGA-AF-6655-01	609	0
TCGA-AF-6672-01	748	0
TCGA-AF-A56K-01	2635	0
TCGA-AF-A56L-01	2007	0
TCGA-AF-A56N-01	360	0
TCGA-AG-3574-01	1096	1
TCGA-AG-3575-01	365	0
TCGA-AG-3578-01	974	0
TCGA-AG-3580-01	244	0
TCGA-AG-3581-01	215	0
TCGA-AG-3582-01	1096	1
TCGA-AG-3583-01	610	1
TCGA-AG-3584-01	730	1
TCGA-AG-3586-01	31	0
TCGA-AG-3587-01	1400	0
TCGA-AG-3591-01	1035	0
TCGA-AG-3592-01	1035	0
TCGA-AG-3593-01	1035	0
TCGA-AG-3594-01	61	1
TCGA-AG-3598-01	1522	0
TCGA-AG-3599-01	366	0
TCGA-AG-3600-01	184	0
TCGA-AG-3601-01	0	0
TCGA-AG-3602-01	0	0
TCGA-AG-3605-01	30	0
TCGA-AG-3608-01	485	0
TCGA-AG-3609-01	608	0
TCGA-AG-3611-01	424	0
TCGA-AG-3612-01	608	0
TCGA-AG-3725-01	638	0
TCGA-AG-3726-01	243	0
TCGA-AG-3727-01	30	0
TCGA-AG-3728-01	912	0
TCGA-AG-3731-01	1126	0
TCGA-AG-3732-01	1003	0
TCGA-AG-3742-01	30	0
TCGA-AG-3878-01	30	0
TCGA-AG-3881-01	579	0
TCGA-AG-3882-01	608	0
TCGA-AG-3883-01	31	0
TCGA-AG-3885-01	546	0
TCGA-AG-3887-01	1124	0
TCGA-AG-3890-01	518	0
TCGA-AG-3892-01	396	0
TCGA-AG-3893-01	1065	0
TCGA-AG-3894-01	426	0
TCGA-AG-3896-01	31	0
TCGA-AG-3898-01	1461	0
TCGA-AG-3901-01	761	0
TCGA-AG-3902-01	974	0
TCGA-AG-3909-01	608	0
TCGA-AG-3999-01	853	0
TCGA-AG-4001-01	1096	0
TCGA-AG-4005-01	427	0
TCGA-AG-4007-01	31	0
TCGA-AG-4008-01	518	0
TCGA-AG-4015-01	0	0
TCGA-AG-4021-01	121	1
TCGA-AG-4022-01	1400	0
TCGA-AG-A002-01	638	0
TCGA-AG-A008-01	424	0
TCGA-AG-A00C-01	183	0
TCGA-AG-A00H-01	790	0
TCGA-AG-A00Y-01	700	0
TCGA-AG-A011-01	1126	0
TCGA-AG-A014-01	485	0
TCGA-AG-A015-01	1096	0
TCGA-AG-A016-01	276	0
TCGA-AG-A01J-01	31	0
TCGA-AG-A01L-01	0	0
TCGA-AG-A01N-01	943	0
TCGA-AG-A01W-01	0	0
TCGA-AG-A01Y-01	0	0
TCGA-AG-A020-01	31	0
TCGA-AG-A023-01	1581	1
TCGA-AG-A025-01	1520	0
TCGA-AG-A026-01	59	1
TCGA-AG-A02G-01	1185	1
TCGA-AG-A02N-01	1885	0
TCGA-AG-A02X-01	1247	0
TCGA-AG-A032-01	1157	0
TCGA-AG-A036-01	3562	0
TCGA-AH-6544-01	1173	0
TCGA-AH-6547-01	76	1
TCGA-AH-6549-01	532	0
TCGA-AH-6643-01	1314	1
TCGA-AH-6644-01	838	0
TCGA-AH-6897-01	804	0
TCGA-AH-6903-01	592	0
TCGA-BM-6198-01	646	0
TCGA-CI-6619-01	184	0
TCGA-CI-6620-01	1009	0
TCGA-CI-6621-01	419	0
TCGA-CI-6622-01	1362	0
TCGA-CI-6623-01	1443	0
TCGA-CI-6624-01	1466	0
TCGA-CL-4957-01	425	0
TCGA-CL-5917-01	2376	0
TCGA-CL-5918-01	218	0
TCGA-DC-4745-01	639	0
TCGA-DC-4749-01	762	0
TCGA-DC-5337-01	792	0
TCGA-DC-5869-01	943	0
TCGA-DC-6154-01	365	0
TCGA-DC-6155-01	425	0
TCGA-DC-6156-01	943	0
TCGA-DC-6157-01	1581	0
TCGA-DC-6158-01	334	1
TCGA-DC-6160-01	1339	0
TCGA-DC-6681-01	790	0
TCGA-DC-6682-01	762	0
TCGA-DC-6683-01	762	0
TCGA-DT-5265-01	384	0
TCGA-DY-A0XA-01	3846	0
TCGA-DY-A1DC-01	1258	1
TCGA-DY-A1DD-01	1741	1
TCGA-DY-A1DE-01	3932	0
TCGA-DY-A1DF-01	734	1
TCGA-DY-A1DG-01	1566	1
TCGA-DY-A1H8-01	992	1
TCGA-EF-5830-01	106	0
TCGA-EF-5831-01	127	0
TCGA-EI-6506-01	625	0
TCGA-EI-6507-01	607	0
TCGA-EI-6508-01	636	0
TCGA-EI-6509-01	517	0
TCGA-EI-6510-01	556	0
TCGA-EI-6511-01	482	0
TCGA-EI-6512-01	538	0
TCGA-EI-6513-01	497	0
TCGA-EI-6514-01	496	0
TCGA-EI-6881-01	499	0
TCGA-EI-6882-01	262	0
TCGA-EI-6883-01	350	0
TCGA-EI-6884-01	328	0
TCGA-EI-6885-01	415	0
TCGA-EI-6917-01	531	0
TCGA-EI-7002-01	364	0
TCGA-EI-7004-01	257	0
TCGA-F5-6464-01	303	1
TCGA-F5-6465-01	1506	0
TCGA-F5-6571-01	1288	0
TCGA-F5-6702-01	452	0
TCGA-F5-6811-01	979	0
TCGA-F5-6812-01	1110	0
TCGA-F5-6813-01	598	1
TCGA-F5-6814-01	1131	0
TCGA-F5-6861-01	1160	0
TCGA-F5-6863-01	361	1
TCGA-F5-6864-01	379	0
TCGA-G5-6233-01	556	1
TCGA-G5-6235-01	1696	0
TCGA-G5-6572-02	1432	1
TCGA-G5-6572-01	1432	1
TCGA-G5-6641-01	804	0

## Sheet: 矫正
TCGA-3L-AA1B-01	475	0	TCGA-3L-AA1B-01
TCGA-4N-A93T-01	146	0	TCGA-4N-A93T-01
TCGA-4T-AA8H-01	385	0	TCGA-4T-AA8H-01
TCGA-5M-AAT4-01	49	1	TCGA-5M-AAT4-01
TCGA-5M-AAT6-01	290	1	TCGA-5M-AAT6-01
TCGA-5M-AATE-01	1200	0	TCGA-5M-AATE-01
TCGA-A6-2670-01	775	0
TCGA-A6-2671-01	1331	1
TCGA-A6-2672-01	1419	0
TCGA-A6-2674-01	1331	0
TCGA-A6-2675-01	1321	0	TCGA-A6-2675-01
TCGA-A6-2676-01	1305	1
TCGA-A6-2677-01	740	1
TCGA-A6-2678-01	1286	0
TCGA-A6-2679-01	1366	0
TCGA-A6-2680-01	1068	0
TCGA-A6-2681-01	1387	0
TCGA-A6-2682-01	424	1	TCGA-A6-2682-01
TCGA-A6-2683-01	504	1
TCGA-A6-2684-01	1127	0	TCGA-A6-2684-01
TCGA-A6-2685-01	1133	0	TCGA-A6-2685-01
TCGA-A6-2686-01	1126	1	TCGA-A6-2686-01
TCGA-A6-3807-01	1054	0
TCGA-A6-3808-01	1014	0
TCGA-A6-3809-01	996	0
TCGA-A6-3810-01	1111	0
TCGA-A6-4105-01	442	1	TCGA-A6-4105-01
TCGA-A6-4107-01	987	0
TCGA-A6-5656-01	1001	0	TCGA-A6-5656-01
TCGA-A6-5657-01	962	0	TCGA-A6-5657-01
TCGA-A6-5659-01	926	0	TCGA-A6-5659-01
TCGA-A6-5660-01	888	0	TCGA-A6-5660-01
TCGA-A6-5661-01	1020	0	TCGA-A6-5661-01
TCGA-A6-5662-01	718	0	TCGA-A6-5662-01
TCGA-A6-5664-01	672	0	TCGA-A6-5664-01
TCGA-A6-5665-01	671	0	TCGA-A6-5665-01
TCGA-A6-5666-01	995	0	TCGA-A6-5666-01
TCGA-A6-5667-01	887	0	TCGA-A6-5667-01
TCGA-A6-6137-01	824	0	TCGA-A6-6137-01
TCGA-A6-6138-01	685	0	TCGA-A6-6138-01
TCGA-A6-6140-01	734	0	TCGA-A6-6140-01
TCGA-A6-6141-01	255	0	TCGA-A6-6141-01
TCGA-A6-6142-01	763	0	TCGA-A6-6142-01
TCGA-A6-6648-01	766	0	TCGA-A6-6648-01
TCGA-A6-6649-01	735	0	TCGA-A6-6649-01
TCGA-A6-6650-01	627	0	TCGA-A6-6650-01
TCGA-A6-6651-01	662	0	TCGA-A6-6651-01
TCGA-A6-6652-01	751	0	TCGA-A6-6652-01
TCGA-A6-6653-01	742	0	TCGA-A6-6653-01
TCGA-A6-6654-01	726	0	TCGA-A6-6654-01
TCGA-A6-6780-01	612	0	TCGA-A6-6780-01
TCGA-A6-6781-01	598	0	TCGA-A6-6781-01
TCGA-A6-6782-01	617	0	TCGA-A6-6782-01
TCGA-A6-A565-01	494	1	TCGA-A6-A565-01
TCGA-A6-A566-01	758	1	TCGA-A6-A566-01
TCGA-A6-A567-01	1881	1	TCGA-A6-A567-01
TCGA-A6-A56B-01	1711	1	TCGA-A6-A56B-01
TCGA-A6-A5ZU-01	293	0	TCGA-A6-A5ZU-01
TCGA-AA-3488-01	153	1
TCGA-AA-3489-01	214	1	TCGA-AA-3489-01
TCGA-AA-3492-01	92	1	TCGA-AA-3492-01
TCGA-AA-3494-01	31	0
TCGA-AA-3495-01	1127	0	TCGA-AA-3495-01
TCGA-AA-3496-01	31	0	TCGA-AA-3496-01
TCGA-AA-3502-01	1065	0	TCGA-AA-3502-01
TCGA-AA-3506-01	1765	0	TCGA-AA-3506-01
TCGA-AA-3509-01	1915	0	TCGA-AA-3509-01
TCGA-AA-3510-01	1946	0
TCGA-AA-3511-01	212	0	TCGA-AA-3511-01
TCGA-AA-3514-01	31	0
TCGA-AA-3516-01	396	1
TCGA-AA-3517-01	1186	0
TCGA-AA-3518-01	31	0
TCGA-AA-3519-01	276	0
TCGA-AA-3520-01	731	0
TCGA-AA-3522-01	1127	0
TCGA-AA-3524-01	1096	0
TCGA-AA-3525-01	245	0
TCGA-AA-3526-01	580	0	TCGA-AA-3526-01
TCGA-AA-3530-01	580	0
TCGA-AA-3531-01	1035	0
TCGA-AA-3532-01	882	0
TCGA-AA-3534-01	882	0
TCGA-AA-3538-01	791	0
TCGA-AA-3542-01	395	0
TCGA-AA-3543-01	30	0
TCGA-AA-3544-01	426	0
TCGA-AA-3548-01	1034	0
TCGA-AA-3549-01	639	0
TCGA-AA-3552-01	396	1
TCGA-AA-3553-01	730	0
TCGA-AA-3554-01	546	0
TCGA-AA-3555-01	911	0
TCGA-AA-3556-01	700	0
TCGA-AA-3558-01	638	0
TCGA-AA-3560-01	608	0
TCGA-AA-3561-01	424	0
TCGA-AA-3562-01	608	0
TCGA-AA-3655-01	1856	0	TCGA-AA-3655-01
TCGA-AA-3660-01	2375	0	TCGA-AA-3660-01
TCGA-AA-3662-01	184	0	TCGA-AA-3662-01
TCGA-AA-3663-01	212	0	TCGA-AA-3663-01
TCGA-AA-3664-01	1643	0
TCGA-AA-3666-01	61	1
TCGA-AA-3667-01	426	0
TCGA-AA-3672-01	28	0
TCGA-AA-3673-01	1522	0
TCGA-AA-3675-01	1431	0	TCGA-AA-3675-01
TCGA-AA-3678-01	1430	0
TCGA-AA-3679-01	457	0
TCGA-AA-3680-01	335	1
TCGA-AA-3681-01	182	0
TCGA-AA-3685-01	1127	0	TCGA-AA-3685-01
TCGA-AA-3688-01	578	0
TCGA-AA-3692-01	1095	1
TCGA-AA-3696-01	153	1
TCGA-AA-3697-01	2587	0	TCGA-AA-3697-01
TCGA-AA-3710-01	821	0
TCGA-AA-3713-01	579	0	TCGA-AA-3713-01
TCGA-AA-3715-01	579	1
TCGA-AA-3811-01	306	1
TCGA-AA-3812-01	1066	0
TCGA-AA-3815-01	1005	0
TCGA-AA-3818-01	30	1
TCGA-AA-3819-01	761	0
TCGA-AA-3821-01	31	0
TCGA-AA-3831-01	547	0
TCGA-AA-3833-01	485	0
TCGA-AA-3837-01	1186	0
TCGA-AA-3841-01	1124	0
TCGA-AA-3842-01	1126	0
TCGA-AA-3844-01	454	0
TCGA-AA-3846-01	518	0
TCGA-AA-3848-01	306	1
TCGA-AA-3851-01	1006	0
TCGA-AA-3854-01	1096	0
TCGA-AA-3855-01	975	0
TCGA-AA-3856-01	30	0
TCGA-AA-3858-01	945	0
TCGA-AA-3860-01	945	0
TCGA-AA-3861-01	914	0
TCGA-AA-3862-01	914	0
TCGA-AA-3864-01	1612	0
TCGA-AA-3866-01	518	0
TCGA-AA-3867-01	731	0
TCGA-AA-3869-01	822	1
TCGA-AA-3870-01	912	0
TCGA-AA-3875-01	549	0
TCGA-AA-3877-01	943	0
TCGA-AA-3930-01	61	1
TCGA-AA-3939-01	395	0
TCGA-AA-3941-01	730	0
TCGA-AA-3947-01	1004	0
TCGA-AA-3949-01	791	0
TCGA-AA-3950-01	730	0
TCGA-AA-3952-01	61	1
TCGA-AA-3955-01	638	0
TCGA-AA-3956-01	1035	0
TCGA-AA-3966-01	61	0
TCGA-AA-3968-01	669	0
TCGA-AA-3970-01	1096	0
TCGA-AA-3971-01	489	0
TCGA-AA-3972-01	1551	0
TCGA-AA-3973-01	397	0
TCGA-AA-3975-01	1036	0
TCGA-AA-3976-01	791	0
TCGA-AA-3977-01	761	0
TCGA-AA-3979-01	730	0
TCGA-AA-3980-01	822	0
TCGA-AA-3982-01	822	0
TCGA-AA-3986-01	580	0
TCGA-AA-3989-01	242	1
TCGA-AA-3994-01	822	0
TCGA-AA-A004-01	424	0
TCGA-AA-A00A-01	1157	0
TCGA-AA-A00D-01	578	0
TCGA-AA-A00E-01	913	0
TCGA-AA-A00F-01	1035	0
TCGA-AA-A00J-01	549	0
TCGA-AA-A00K-01	549	0
TCGA-AA-A00L-01	1157	0
TCGA-AA-A00N-01	122	1
TCGA-AA-A00O-01	822	0
TCGA-AA-A00Q-01	1278	0
TCGA-AA-A00R-01	30	0
TCGA-AA-A00U-01	518	0
TCGA-AA-A00W-01	456	0
TCGA-AA-A00Z-01	669	0
TCGA-AA-A010-01	1064	0
TCGA-AA-A017-01	457	0
TCGA-AA-A01C-01	457	0
TCGA-AA-A01D-01	334	1
TCGA-AA-A01F-01	974	0
TCGA-AA-A01G-01	365	0
TCGA-AA-A01I-01	943	0
TCGA-AA-A01K-01	943	0
TCGA-AA-A01P-01	1158	1	TCGA-AA-A01P-01
TCGA-AA-A01Q-01	31	0
TCGA-AA-A01R-01	1065	0
TCGA-AA-A01S-01	31	0
TCGA-AA-A01T-01	1005	0
TCGA-AA-A01V-01	31	0
TCGA-AA-A01X-01	791	0	TCGA-AA-A01X-01
TCGA-AA-A01Z-01	1126	0	TCGA-AA-A01Z-01
TCGA-AA-A024-01	1188	1
TCGA-AA-A029-01	1581	0
TCGA-AA-A02E-01	90	1
TCGA-AA-A02F-01	1216	0
TCGA-AA-A02H-01	61	1
TCGA-AA-A02J-01	153	1
TCGA-AA-A02K-01	426	1	TCGA-AA-A02K-01
TCGA-AA-A02O-01	28	0
TCGA-AA-A02R-01	670	1
TCGA-AA-A02W-01	1247	0
TCGA-AA-A02Y-01	1216	0	TCGA-AA-A02Y-01
TCGA-AA-A03F-01	549	1
TCGA-AA-A03J-01	1246	0
TCGA-AD-5900-01	370	0	TCGA-AD-5900-01
TCGA-AD-6548-01	650	0	TCGA-AD-6548-01
TCGA-AD-6888-01	472	1	TCGA-AD-6888-01
TCGA-AD-6889-01	2532	1	TCGA-AD-6889-01
TCGA-AD-6890-01	746	0	TCGA-AD-6890-01
TCGA-AD-6895-01	763	0	TCGA-AD-6895-01
TCGA-AD-6899-01	176	1	TCGA-AD-6899-01
TCGA-AD-6901-01	682	1	TCGA-AD-6901-01
TCGA-AD-6963-01	834	0	TCGA-AD-6963-01
TCGA-AD-6964-01	331	1	TCGA-AD-6964-01
TCGA-AD-6965-01	805	0	TCGA-AD-6965-01
TCGA-AD-A5EK-01	500	0	TCGA-AD-A5EK-01
TCGA-AM-5820-01	14	0	TCGA-AM-5820-01
TCGA-AM-5821-01	28	0	TCGA-AM-5821-01
TCGA-AU-3779-01	441	0	TCGA-AU-3779-01
TCGA-AU-6004-01	824	0	TCGA-AU-6004-01
TCGA-AY-4070-01	496	1
TCGA-AY-4071-01	29	1
TCGA-AY-5543-01	1004	0	TCGA-AY-5543-01
TCGA-AY-6196-01	6	0	TCGA-AY-6196-01
TCGA-AY-6197-01	652	0	TCGA-AY-6197-01
TCGA-AY-6386-01	542	0	TCGA-AY-6386-01
TCGA-AY-A54L-01	525	0	TCGA-AY-A54L-01
TCGA-AY-A69D-01	543	0	TCGA-AY-A69D-01
TCGA-AY-A71X-01	588	0	TCGA-AY-A71X-01
TCGA-AY-A8YK-01	573	0	TCGA-AY-A8YK-01
TCGA-AZ-4308-01	3324	0
TCGA-AZ-4313-01	2310	0	TCGA-AZ-4313-01
TCGA-AZ-4315-01	1776	0	TCGA-AZ-4315-01
TCGA-AZ-4323-01	43	1	TCGA-AZ-4323-01
TCGA-AZ-4614-01	172	1	TCGA-AZ-4614-01
TCGA-AZ-4615-01	1002	0	TCGA-AZ-4615-01
TCGA-AZ-4616-01	156	1	TCGA-AZ-4616-01
TCGA-AZ-4681-01	3247	0
TCGA-AZ-4682-01	680	1	TCGA-AZ-4682-01
TCGA-AZ-4684-01	1977	0	TCGA-AZ-4684-01
TCGA-AZ-5403-01	1910	1	TCGA-AZ-5403-01
TCGA-AZ-5407-01	2683	0	TCGA-AZ-5407-01
TCGA-AZ-6598-01	1503	1	TCGA-AZ-6598-01
TCGA-AZ-6599-01	206	1	TCGA-AZ-6599-01
TCGA-AZ-6600-01	368	1	TCGA-AZ-6600-01
TCGA-AZ-6601-01	3042	1	TCGA-AZ-6601-01
TCGA-AZ-6603-01	899	1	TCGA-AZ-6603-01
TCGA-AZ-6605-01	159	1	TCGA-AZ-6605-01
TCGA-AZ-6606-01	357	1	TCGA-AZ-6606-01
TCGA-AZ-6607-01	97	1	TCGA-AZ-6607-01
TCGA-AZ-6608-01	59	1	TCGA-AZ-6608-01
TCGA-CA-5254-01	386	0	TCGA-CA-5254-01
TCGA-CA-5255-01	376	0	TCGA-CA-5255-01
TCGA-CA-5256-01	379	0	TCGA-CA-5256-01
TCGA-CA-5796-01	377	0	TCGA-CA-5796-01
TCGA-CA-5797-01	383	0	TCGA-CA-5797-01
TCGA-CA-6715-01	383	0	TCGA-CA-6715-01
TCGA-CA-6716-01	371	0	TCGA-CA-6716-01
TCGA-CA-6717-01	388	0	TCGA-CA-6717-01
TCGA-CA-6718-01	306	1	TCGA-CA-6718-01
TCGA-CA-6719-01	435	0	TCGA-CA-6719-01
TCGA-CK-4947-01	534	0	TCGA-CK-4947-01
TCGA-CK-4948-01	4502	0	TCGA-CK-4948-01
TCGA-CK-4950-01	2599	0	TCGA-CK-4950-01
TCGA-CK-4951-01	2134	1	TCGA-CK-4951-01
TCGA-CK-4952-01	475	0	TCGA-CK-4952-01
TCGA-CK-5912-01	1493	1	TCGA-CK-5912-01
TCGA-CK-5913-01	1561	0	TCGA-CK-5913-01
TCGA-CK-5914-01	669	0	TCGA-CK-5914-01
TCGA-CK-5916-01	643	1	TCGA-CK-5916-01
TCGA-CK-6747-01	2523	0	TCGA-CK-6747-01
TCGA-CK-6748-01	61	0	TCGA-CK-6748-01
TCGA-CK-6751-01	3780	0	TCGA-CK-6751-01
TCGA-CM-4743-01	701	0	TCGA-CM-4743-01
TCGA-CM-4744-01	609	0	TCGA-CM-4744-01
TCGA-CM-4746-01	1126	0
TCGA-CM-4747-01	761	0	TCGA-CM-4747-01
TCGA-CM-4748-01	792	0
TCGA-CM-4750-01	244	0
TCGA-CM-4751-01	822	0	TCGA-CM-4751-01
TCGA-CM-4752-01	396	0
TCGA-CM-5341-01	884	0
TCGA-CM-5344-01	670	0	TCGA-CM-5344-01
TCGA-CM-5348-01	699	0	TCGA-CM-5348-01
TCGA-CM-5349-01	915	0	TCGA-CM-5349-01
TCGA-CM-5860-01	974	0	TCGA-CM-5860-01
TCGA-CM-5861-01	457	0	TCGA-CM-5861-01
TCGA-CM-5862-01	153	1	TCGA-CM-5862-01
TCGA-CM-5863-01	457	0	TCGA-CM-5863-01
TCGA-CM-5864-01	457	0	TCGA-CM-5864-01
TCGA-CM-5868-01	518	0	TCGA-CM-5868-01
TCGA-CM-6161-01	457	0	TCGA-CM-6161-01
TCGA-CM-6162-01	365	0	TCGA-CM-6162-01
TCGA-CM-6163-01	427	0	TCGA-CM-6163-01
TCGA-CM-6164-01	883	0	TCGA-CM-6164-01
TCGA-CM-6165-01	488	0	TCGA-CM-6165-01
TCGA-CM-6166-01	669	0	TCGA-CM-6166-01
TCGA-CM-6167-01	456	0	TCGA-CM-6167-01
TCGA-CM-6168-01	395	0	TCGA-CM-6168-01
TCGA-CM-6169-01	396	0	TCGA-CM-6169-01
TCGA-CM-6170-01	457	0	TCGA-CM-6170-01
TCGA-CM-6171-01	427	0	TCGA-CM-6171-01
TCGA-CM-6172-01	335	0	TCGA-CM-6172-01
TCGA-CM-6674-01	394	0	TCGA-CM-6674-01
TCGA-CM-6675-01	397	0	TCGA-CM-6675-01
TCGA-CM-6676-01	337	0	TCGA-CM-6676-01
TCGA-CM-6677-01	337	0	TCGA-CM-6677-01
TCGA-CM-6678-01	335	0	TCGA-CM-6678-01
TCGA-CM-6679-01	306	0	TCGA-CM-6679-01
TCGA-CM-6680-01	366	0	TCGA-CM-6680-01
TCGA-D5-5537-01	1381	1	TCGA-D5-5537-01
TCGA-D5-5538-01	1661	1	TCGA-D5-5538-01
TCGA-D5-5539-01	596	0	TCGA-D5-5539-01
TCGA-D5-5540-01	1706	0	TCGA-D5-5540-01
TCGA-D5-5541-01	1701	0	TCGA-D5-5541-01
TCGA-D5-6529-01	614	0	TCGA-D5-6529-01
TCGA-D5-6530-01	621	0	TCGA-D5-6530-01
TCGA-D5-6531-01	540	0	TCGA-D5-6531-01
TCGA-D5-6532-01	555	0	TCGA-D5-6532-01
TCGA-D5-6533-01	775	0	TCGA-D5-6533-01
TCGA-D5-6534-01	1316	0	TCGA-D5-6534-01
TCGA-D5-6535-01	460	0	TCGA-D5-6535-01
TCGA-D5-6536-01	543	0	TCGA-D5-6536-01
TCGA-D5-6537-01	146	1	TCGA-D5-6537-01
TCGA-D5-6538-01	521	0	TCGA-D5-6538-01
TCGA-D5-6539-01	380	0	TCGA-D5-6539-01
TCGA-D5-6540-01	491	0	TCGA-D5-6540-01
TCGA-D5-6541-01	474	0	TCGA-D5-6541-01
TCGA-D5-6898-01	229	0	TCGA-D5-6898-01
TCGA-D5-6920-01	377	0	TCGA-D5-6920-01
TCGA-D5-6922-01	308	0	TCGA-D5-6922-01
TCGA-D5-6923-01	378	0	TCGA-D5-6923-01
TCGA-D5-6924-01	435	0	TCGA-D5-6924-01
TCGA-D5-6926-01	275	0	TCGA-D5-6926-01
TCGA-D5-6927-01	287	0	TCGA-D5-6927-01
TCGA-D5-6928-01	354	0	TCGA-D5-6928-01
TCGA-D5-6929-01	408	0	TCGA-D5-6929-01
TCGA-D5-6930-01	406	0	TCGA-D5-6930-01
TCGA-D5-6931-01	365	0	TCGA-D5-6931-01
TCGA-D5-6932-01	346	0	TCGA-D5-6932-01
TCGA-D5-7000-01	312	0	TCGA-D5-7000-01
TCGA-DM-A0X9-01	3641	0	TCGA-DM-A0X9-01
TCGA-DM-A0XD-01	743	1	TCGA-DM-A0XD-01
TCGA-DM-A0XF-01	1162	1	TCGA-DM-A0XF-01
TCGA-DM-A1D0-01	3974	0	TCGA-DM-A1D0-01
TCGA-DM-A1D4-01	2821	1	TCGA-DM-A1D4-01
TCGA-DM-A1D6-01	1518	1	TCGA-DM-A1D6-01
TCGA-DM-A1D7-01	405	1	TCGA-DM-A1D7-01
TCGA-DM-A1D8-01	383	1	TCGA-DM-A1D8-01
TCGA-DM-A1D9-01	4270	0	TCGA-DM-A1D9-01
TCGA-DM-A1DA-01	228	1	TCGA-DM-A1DA-01
TCGA-DM-A1DB-01	1348	1	TCGA-DM-A1DB-01
TCGA-DM-A1HA-01	4000	0	TCGA-DM-A1HA-01
TCGA-DM-A1HB-01	4126	0	TCGA-DM-A1HB-01
TCGA-DM-A280-01	236	1	TCGA-DM-A280-01
TCGA-DM-A282-01	4233	0	TCGA-DM-A282-01
TCGA-DM-A285-01	179	1	TCGA-DM-A285-01
TCGA-DM-A288-01	427	1	TCGA-DM-A288-01
TCGA-DM-A28A-01	805	1	TCGA-DM-A28A-01
TCGA-DM-A28C-01	2475	1	TCGA-DM-A28C-01
TCGA-DM-A28E-01	3648	0	TCGA-DM-A28E-01
TCGA-DM-A28F-01	1094	1	TCGA-DM-A28F-01
TCGA-DM-A28G-01	1849	1	TCGA-DM-A28G-01
TCGA-DM-A28H-01	3561	0	TCGA-DM-A28H-01
TCGA-DM-A28K-01	2988	0	TCGA-DM-A28K-01
TCGA-DM-A28M-01	2895	0	TCGA-DM-A28M-01
TCGA-F4-6459-01	262	1	TCGA-F4-6459-01
TCGA-F4-6460-01	972	1	TCGA-F4-6460-01
TCGA-F4-6461-01	338	1	TCGA-F4-6461-01
TCGA-F4-6463-01	1087	0	TCGA-F4-6463-01
TCGA-F4-6569-01	1087	0	TCGA-F4-6569-01
TCGA-F4-6570-01	188	1	TCGA-F4-6570-01
TCGA-F4-6703-01	1456	0	TCGA-F4-6703-01
TCGA-F4-6704-01	47	0	TCGA-F4-6704-01
TCGA-F4-6805-01	1047	0	TCGA-F4-6805-01
TCGA-F4-6806-01	1260	0	TCGA-F4-6806-01
TCGA-F4-6807-01	1309	0	TCGA-F4-6807-01
TCGA-F4-6808-01	1024	0	TCGA-F4-6808-01
TCGA-F4-6809-01	403	1	TCGA-F4-6809-01
TCGA-F4-6854-01	16	0	TCGA-F4-6854-01
TCGA-F4-6855-01	1442	0	TCGA-F4-6855-01
TCGA-F4-6856-01	1074	0	TCGA-F4-6856-01
TCGA-G4-6293-01	4051	0	TCGA-G4-6293-01
TCGA-G4-6294-01	858	1	TCGA-G4-6294-01
TCGA-G4-6295-01	254	0	TCGA-G4-6295-01
TCGA-G4-6297-01	2506	0	TCGA-G4-6297-01
TCGA-G4-6298-01	715	1	TCGA-G4-6298-01
TCGA-G4-6299-01	2268	0	TCGA-G4-6299-01
TCGA-G4-6302-01	2047	1	TCGA-G4-6302-01
TCGA-G4-6303-01	2003	1	TCGA-G4-6303-01
TCGA-G4-6304-01	1631	0	TCGA-G4-6304-01
TCGA-G4-6306-01	1359	0	TCGA-G4-6306-01
TCGA-G4-6307-01	1674	0	TCGA-G4-6307-01
TCGA-G4-6309-01	2600	0	TCGA-G4-6309-01
TCGA-G4-6310-01	1935	0	TCGA-G4-6310-01
TCGA-G4-6311-01	1199	0	TCGA-G4-6311-01
TCGA-G4-6314-01	1093	0	TCGA-G4-6314-01
TCGA-G4-6315-01	1883	0	TCGA-G4-6315-01
TCGA-G4-6317-02	1095	0	TCGA-G4-6317-01
TCGA-G4-6317-01	1095	0	TCGA-G4-6317-01
TCGA-G4-6320-01	804	0	TCGA-G4-6320-01
TCGA-G4-6321-01	672	0	TCGA-G4-6321-01
TCGA-G4-6322-01	792	0	TCGA-G4-6322-01
TCGA-G4-6323-01	419	0	TCGA-G4-6323-01
TCGA-G4-6586-01	1089	0	TCGA-G4-6586-01
TCGA-G4-6588-01	796	0	TCGA-G4-6588-01
TCGA-G4-6625-01	2792	0	TCGA-G4-6625-01
TCGA-G4-6626-01	1422	1	TCGA-G4-6626-01
TCGA-G4-6627-01	2275	0	TCGA-G4-6627-01
TCGA-G4-6628-01	2424	0	TCGA-G4-6628-01
TCGA-NH-A50T-01	553	0	TCGA-NH-A50T-01
TCGA-NH-A50U-01	334	1	TCGA-NH-A50U-01
TCGA-NH-A50V-01	588	0	TCGA-NH-A50V-01
TCGA-NH-A5IV-01	588	0	TCGA-NH-A5IV-01
TCGA-NH-A6GA-01	302	1	TCGA-NH-A6GA-01
TCGA-NH-A6GB-01	476	0	TCGA-NH-A6GB-01
TCGA-NH-A6GC-01	389	0	TCGA-NH-A6GC-01
TCGA-NH-A8F7-06	543	0	TCGA-NH-A8F7-06
TCGA-NH-A8F7-01	543	0	TCGA-NH-A8F7-06
TCGA-NH-A8F8-01	511	1	TCGA-NH-A8F8-01
TCGA-QG-A5YV-01	1301	0	TCGA-QG-A5YV-01
TCGA-QG-A5YW-01	896	0	TCGA-QG-A5YW-01
TCGA-QG-A5YX-01	1003	0	TCGA-QG-A5YX-01
TCGA-QG-A5Z1-01	256	1	TCGA-QG-A5Z1-01
TCGA-QG-A5Z2-01	952	0	TCGA-QG-A5Z2-01
TCGA-QL-A97D-01	666	0	TCGA-QL-A97D-01
TCGA-RU-A8FL-01	1177	0	TCGA-RU-A8FL-01
TCGA-SS-A7HO-01	1829	0	TCGA-SS-A7HO-01
TCGA-T9-A92H-01	362	0	TCGA-T9-A92H-01
TCGA-WS-AB45-01	2130	0	TCGA-WS-AB45-01
TCGA-AF-2687-01	1427	0	TCGA-AF-2687-01
TCGA-AF-2689-01	1201	1
TCGA-AF-2690-01	524	1	TCGA-AF-2690-01
TCGA-AF-2691-01	1309	0
TCGA-AF-2692-01	412	0
TCGA-AF-2693-01	1155	0	TCGA-AF-2693-01
TCGA-AF-3400-01	1049	0
TCGA-AF-3911-01	1148	0	TCGA-AF-3911-01
TCGA-AF-3913-01	316	1
TCGA-AF-4110-01	912	0	TCGA-AF-4110-01
TCGA-AF-5654-01	512	1	TCGA-AF-5654-01
TCGA-AF-6136-01	741	0	TCGA-AF-6136-01
TCGA-AF-6655-01	609	0	TCGA-AF-6655-01
TCGA-AF-6672-01	748	0	TCGA-AF-6672-01
TCGA-AF-A56K-01	2635	0	TCGA-AF-A56K-01
TCGA-AF-A56L-01	2007	0	TCGA-AF-A56L-01
TCGA-AF-A56N-01	360	0	TCGA-AF-A56N-01
TCGA-AG-3574-01	1096	1
TCGA-AG-3575-01	365	0
TCGA-AG-3578-01	974	0
TCGA-AG-3580-01	244	0
TCGA-AG-3581-01	215	0
TCGA-AG-3582-01	1096	1
TCGA-AG-3583-01	610	1
TCGA-AG-3584-01	730	1
TCGA-AG-3586-01	31	0
TCGA-AG-3587-01	1400	0
TCGA-AG-3591-01	1035	0	TCGA-AG-3591-01
TCGA-AG-3592-01	1035	0	TCGA-AG-3592-01
TCGA-AG-3593-01	1035	0
TCGA-AG-3594-01	61	1
TCGA-AG-3598-01	1522	0
TCGA-AG-3599-01	366	0
TCGA-AG-3600-01	184	0
TCGA-AG-3605-01	30	0
TCGA-AG-3608-01	485	0
TCGA-AG-3609-01	608	0
TCGA-AG-3611-01	424	0
TCGA-AG-3612-01	608	0
TCGA-AG-3725-01	638	0	TCGA-AG-3725-01
TCGA-AG-3726-01	243	0
TCGA-AG-3727-01	30	0
TCGA-AG-3728-01	912	0
TCGA-AG-3731-01	1126	0	TCGA-AG-3731-01
TCGA-AG-3732-01	1003	0	TCGA-AG-3732-01
TCGA-AG-3742-01	30	0	TCGA-AG-3742-01
TCGA-AG-3878-01	30	0
TCGA-AG-3881-01	579	0
TCGA-AG-3882-01	608	0
TCGA-AG-3883-01	31	0
TCGA-AG-3885-01	546	0
TCGA-AG-3887-01	1124	0
TCGA-AG-3890-01	518	0
TCGA-AG-3892-01	396	0
TCGA-AG-3893-01	1065	0
TCGA-AG-3894-01	426	0
TCGA-AG-3896-01	31	0
TCGA-AG-3898-01	1461	0
TCGA-AG-3901-01	761	0
TCGA-AG-3902-01	974	0	TCGA-AG-3902-01
TCGA-AG-3909-01	608	0
TCGA-AG-3999-01	853	0
TCGA-AG-4001-01	1096	0
TCGA-AG-4005-01	427	0
TCGA-AG-4007-01	31	0
TCGA-AG-4008-01	518	0
TCGA-AG-4021-01	121	1	TCGA-AG-4021-01
TCGA-AG-4022-01	1400	0	TCGA-AG-4022-01
TCGA-AG-A002-01	638	0
TCGA-AG-A008-01	424	0
TCGA-AG-A00C-01	183	0
TCGA-AG-A00H-01	790	0
TCGA-AG-A00Y-01	700	0
TCGA-AG-A011-01	1126	0
TCGA-AG-A014-01	485	0
TCGA-AG-A015-01	1096	0
TCGA-AG-A016-01	276	0
TCGA-AG-A01J-01	31	0
TCGA-AG-A01N-01	943	0
TCGA-AG-A020-01	31	0
TCGA-AG-A023-01	1581	1
TCGA-AG-A025-01	1520	0
TCGA-AG-A026-01	59	1
TCGA-AG-A02G-01	1185	1
TCGA-AG-A02N-01	1885	0
TCGA-AG-A02X-01	1247	0
TCGA-AG-A032-01	1157	0
TCGA-AG-A036-01	3562	0
TCGA-AH-6544-01	1173	0	TCGA-AH-6544-01
TCGA-AH-6547-01	76	1	TCGA-AH-6547-01
TCGA-AH-6549-01	532	0	TCGA-AH-6549-01
TCGA-AH-6643-01	1314	1	TCGA-AH-6643-01
TCGA-AH-6644-01	838	0	TCGA-AH-6644-01
TCGA-AH-6897-01	804	0	TCGA-AH-6897-01
TCGA-AH-6903-01	592	0	TCGA-AH-6903-01
TCGA-BM-6198-01	646	0	TCGA-BM-6198-01
TCGA-CI-6619-01	184	0	TCGA-CI-6619-01
TCGA-CI-6620-01	1009	0	TCGA-CI-6620-01
TCGA-CI-6621-01	419	0	TCGA-CI-6621-01
TCGA-CI-6622-01	1362	0	TCGA-CI-6622-01
TCGA-CI-6623-01	1443	0	TCGA-CI-6623-01
TCGA-CI-6624-01	1466	0	TCGA-CI-6624-01
TCGA-CL-4957-01	425	0	TCGA-CL-4957-01
TCGA-CL-5917-01	2376	0	TCGA-CL-5917-01
TCGA-CL-5918-01	218	0	TCGA-CL-5918-01
TCGA-DC-4745-01	639	0	TCGA-DC-4745-01
TCGA-DC-4749-01	762	0	TCGA-DC-4749-01
TCGA-DC-5337-01	792	0	TCGA-DC-5337-01
TCGA-DC-5869-01	943	0	TCGA-DC-5869-01
TCGA-DC-6154-01	365	0	TCGA-DC-6154-01
TCGA-DC-6155-01	425	0	TCGA-DC-6155-01
TCGA-DC-6156-01	943	0	TCGA-DC-6156-01
TCGA-DC-6157-01	1581	0	TCGA-DC-6157-01
TCGA-DC-6158-01	334	1	TCGA-DC-6158-01
TCGA-DC-6160-01	1339	0	TCGA-DC-6160-01
TCGA-DC-6681-01	790	0	TCGA-DC-6681-01
TCGA-DC-6682-01	762	0	TCGA-DC-6682-01
TCGA-DC-6683-01	762	0	TCGA-DC-6683-01
TCGA-DT-5265-01	384	0	TCGA-DT-5265-01
TCGA-DY-A0XA-01	3846	0	TCGA-DY-A0XA-01
TCGA-DY-A1DC-01	1258	1	TCGA-DY-A1DC-01
TCGA-DY-A1DD-01	1741	1	TCGA-DY-A1DD-01
TCGA-DY-A1DE-01	3932	0	TCGA-DY-A1DE-01
TCGA-DY-A1DF-01	734	1	TCGA-DY-A1DF-01
TCGA-DY-A1DG-01	1566	1	TCGA-DY-A1DG-01
TCGA-DY-A1H8-01	992	1	TCGA-DY-A1H8-01
TCGA-EF-5830-01	106	0	TCGA-EF-5830-01
TCGA-EF-5831-01	127	0	TCGA-EF-5831-01
TCGA-EI-6506-01	625	0	TCGA-EI-6506-01
TCGA-EI-6507-01	607	0	TCGA-EI-6507-01
TCGA-EI-6508-01	636	0	TCGA-EI-6508-01
TCGA-EI-6509-01	517	0	TCGA-EI-6509-01
TCGA-EI-6510-01	556	0	TCGA-EI-6510-01
TCGA-EI-6511-01	482	0	TCGA-EI-6511-01
TCGA-EI-6512-01	538	0	TCGA-EI-6512-01
TCGA-EI-6513-01	497	0	TCGA-EI-6513-01
TCGA-EI-6514-01	496	0	TCGA-EI-6514-01
TCGA-EI-6881-01	499	0	TCGA-EI-6881-01
TCGA-EI-6882-01	262	0	TCGA-EI-6882-01
TCGA-EI-6883-01	350	0	TCGA-EI-6883-01
TCGA-EI-6884-01	328	0	TCGA-EI-6884-01
TCGA-EI-6885-01	415	0	TCGA-EI-6885-01
TCGA-EI-6917-01	531	0	TCGA-EI-6917-01
TCGA-EI-7002-01	364	0	TCGA-EI-7002-01
TCGA-EI-7004-01	257	0	TCGA-EI-7004-01
TCGA-F5-6464-01	303	1	TCGA-F5-6464-01
TCGA-F5-6465-01	1506	0	TCGA-F5-6465-01
TCGA-F5-6571-01	1288	0	TCGA-F5-6571-01
TCGA-F5-6702-01	452	0	TCGA-F5-6702-01
TCGA-F5-6811-01	979	0	TCGA-F5-6811-01
TCGA-F5-6812-01	1110	0	TCGA-F5-6812-01
TCGA-F5-6813-01	598	1	TCGA-F5-6813-01
TCGA-F5-6814-01	1131	0	TCGA-F5-6814-01
TCGA-F5-6861-01	1160	0	TCGA-F5-6861-01
TCGA-F5-6863-01	361	1	TCGA-F5-6863-01
TCGA-F5-6864-01	379	0	TCGA-F5-6864-01
TCGA-G5-6233-01	556	1	TCGA-G5-6233-01
TCGA-G5-6235-01	1696	0	TCGA-G5-6235-01
TCGA-G5-6572-02	1432	1	TCGA-G5-6572-02
TCGA-G5-6572-01	1432	1	TCGA-G5-6572-02
TCGA-G5-6641-01	804	0	TCGA-G5-6641-01
