# Supplementary material for: Integrative analysis of single-cell and bulk RNA seq to reveal the prognostic model and tumor microenvironment remodeling mechanisms of cuproptosis-related genes in colorectal cancer
Source: Aging (Albany NY). 2023 Dec 8;15(23):14422–44. doi: 10.18632/aging.205324 (PMC10756095; doi:10.18632/aging.205324)
Supplement: Supplementary Table 2 [file aging-15-205324-s003.xlsx]

## Sheet: Sheet1
Supplementary Table 2. Functional enrichment of 61CRGs.
ID	Description	GeneRatio	BgRatio	pvalue	p.adjust	qvalue	geneID	Count	one_type	two_type
hsa04978	Mineral absorption	11/51	58/7914	4.59097e-14	6.47327e-12	4.97758e-12	MT1H/MT1X/MT1M/MT1E/MT1F/MT1G/MT1A/SLC31A1/ATOX1/ATP7A/MT2A	11	Organismal Systems	Digestive system
hsa00020	Citrate cycle (TCA cycle)	5/51	30/7914	1.14748e-06	8.08976e-05	6.22057e-05	PDHA1/DLAT/PDHB/DLD/DLST	5	Metabolism	Carbohydrate metabolism
hsa05230	Central carbon metabolism in cancer	6/51	69/7914	4.65817e-06	0.000218934	0.000168348	PDK1/PDHA1/GLS/PDHB/MAP2K2/MAP2K1	6	Human Diseases	Cancer: overview
hsa04066	HIF-1 signaling pathway	6/51	109/7914	6.47067e-05	0.00194946	0.00149903	PDK1/PDHA1/PDHB/MAP2K2/VEGFA/MAP2K1	6	Environmental Information Processing	Signal transduction
hsa05020	Prion diseases	4/51	35/7914	6.91299e-05	0.00194946	0.00149903	PRNP/MAP2K2/SOD1/MAP2K1	4	Human Diseases	Neurodegenerative disease
hsa01200	Carbon metabolism	6/51	117/7914	9.61036e-05	0.00214624	0.00165034	PDHA1/DLAT/PDHB/GCSH/DLD/DLST	6	Metabolism	Global and overview maps
hsa00620	Pyruvate metabolism	4/51	39/7914	0.000106551	0.00214624	0.00165034	PDHA1/DLAT/PDHB/DLD	4	Metabolism	Carbohydrate metabolism
hsa05219	Bladder cancer	4/51	41/7914	0.000129949	0.00229035	0.00176115	CDKN2A/MAP2K2/VEGFA/MAP2K1	4	Human Diseases	Cancer: specific types
hsa00010	Glycolysis / Gluconeogenesis	4/51	68/7914	0.00091946	0.0144049	0.0110765	PDHA1/DLAT/PDHB/DLD	4	Metabolism	Carbohydrate metabolism
hsa01524	Platinum drug resistance	4/51	73/7914	0.00120013	0.0169218	0.0130119	SLC31A1/CDKN2A/ATP7A/ATP7B	4	Human Diseases	Drug resistance: antineoplastic
hsa00350	Tyrosine metabolism	3/51	36/7914	0.00154975	0.019865	0.0152751	TYR/AOC3/DBH	3	Metabolism	Amino acid metabolism
hsa04140	Autophagy - animal	5/51	137/7914	0.00179146	0.0210497	0.016186	MAP2K2/ULK1/BECN1/MAP2K1/ULK2	5	Cellular Processes	Transport and catabolism
hsa00260	Glycine, serine and threonine metabolism	3/51	40/7914	0.00210599	0.0212103	0.0163095	AOC3/GCSH/DLD	3	Metabolism	Amino acid metabolism
hsa04216	Ferroptosis	3/51	40/7914	0.00210599	0.0212103	0.0163095	MAP1LC3A/PRNP/CP	3	Cellular Processes	Cell growth and death
hsa00380	Tryptophan metabolism	3/51	42/7914	0.00242499	0.0227949	0.017528	DLD/DLST/CYP1A1	3	Metabolism	Amino acid metabolism
hsa05014	Amyotrophic lateral sclerosis (ALS)	3/51	51/7914	0.00422367	0.0372211	0.0286209	DAXX/CCS/SOD1	3	Human Diseases	Neurodegenerative disease
hsa04370	VEGF signaling pathway	3/51	59/7914	0.00635972	0.0527483	0.0405604	MAP2K2/VEGFA/MAP2K1	3	Environmental Information Processing	Signal transduction
hsa05223	Non-small cell lung cancer	3/51	66/7914	0.00867426	0.0679484	0.0522485	CDKN2A/MAP2K2/MAP2K1	3	Human Diseases	Cancer: specific types
hsa05211	Renal cell carcinoma	3/51	69/7914	0.0097987	0.0727167	0.055915	MAP2K2/VEGFA/MAP2K1	3	Human Diseases	Cancer: specific types
hsa05218	Melanoma	3/51	72/7914	0.0110045	0.0775815	0.0596558	CDKN2A/MAP2K2/MAP2K1	3	Human Diseases	Cancer: specific types
hsa05212	Pancreatic cancer	3/51	75/7914	0.0122926	0.0781048	0.0600582	CDKN2A/VEGFA/MAP2K1	3	Human Diseases	Cancer: specific types
hsa05214	Glioma	3/51	75/7914	0.0122926	0.0781048	0.0600582	CDKN2A/MAP2K2/MAP2K1	3	Human Diseases	Cancer: specific types
hsa05220	Chronic myeloid leukemia	3/51	76/7914	0.0127405	0.0781048	0.0600582	CDKN2A/MAP2K2/MAP2K1	3	Human Diseases	Cancer: specific types
hsa01521	EGFR tyrosine kinase inhibitor resistance	3/51	79/7914	0.0141399	0.083072	0.0638777	MAP2K2/VEGFA/MAP2K1	3	Human Diseases	Drug resistance: antineoplastic
hsa01100	Metabolic pathways	16/51	1439/7914	0.0157727	0.085609	0.0658285	TYR/COX11/COX17/PDHA1/GLS/LIAS/LIPT1/AOC3/DLAT/PDHB/GCSH/DLD/DBH/DBT/DLST/CYP1A1	16	Metabolism	Global and overview maps
hsa00630	Glyoxylate and dicarboxylate metabolism	2/51	30/7914	0.0157861	0.085609	0.0658285	GCSH/DLD	2	Metabolism	Carbohydrate metabolism
hsa04150	mTOR signaling pathway	4/51	153/7914	0.0166061	0.0867206	0.0666833	MAP2K2/ULK1/MAP2K1/ULK2	4	Environmental Information Processing	Signal transduction
hsa04136	Autophagy - other	2/51	32/7914	0.0178532	0.0899038	0.069131	BECN1/ULK2	2	Cellular Processes	Transport and catabolism
hsa05235	PD-L1 expression and PD-1 checkpoint pathway in cancer	3/51	89/7914	0.0194166	0.0941348	0.0723843	CD274/MAP2K2/MAP2K1	3	Human Diseases	Cancer: overview
hsa00640	Propanoate metabolism	2/51	34/7914	0.0200287	0.0941348	0.0723843	DLD/DBT	2	Metabolism	Carbohydrate metabolism
