# Supplementary material for: Integrative analysis of single-cell and bulk RNA seq to reveal the prognostic model and tumor microenvironment remodeling mechanisms of cuproptosis-related genes in colorectal cancer
Source: Aging (Albany NY). 2023 Dec 8;15(23):14422–44. doi: 10.18632/aging.205324 (PMC10756095; doi:10.18632/aging.205324)
Supplement: Supplementary Table 3 [file aging-15-205324-s004.xlsx]

## Sheet: riskscore
Supplementary Table 3. The risk score of patients in the TCGA cohort.
Tag	Time	Status	RiskScore	Group
TCGA-A6-6648-01	766	0	-0.994161	L
TCGA-CK-5916-01	643	1	-0.836847	L
TCGA-AH-6903-01	592	0	-0.821056	L
TCGA-DM-A28C-01	2475	1	-0.803764	L
TCGA-EI-6882-01	262	0	-0.791967	L
TCGA-AY-6197-01	652	0	-0.777577	L
TCGA-A6-5661-01	1020	0	-0.751701	L
TCGA-AA-3492-01	92	1	-0.728676	L
TCGA-AY-6386-01	542	0	-0.719617	L
TCGA-AA-3713-01	579	0	-0.688809	L
TCGA-QG-A5YX-01	1003	0	-0.639354	L
TCGA-CK-4947-01	534	0	-0.622162	L
TCGA-CK-6751-01	3780	0	-0.613453	L
TCGA-NH-A50T-01	553	0	-0.597045	L
TCGA-CI-6623-01	1443	0	-0.574384	L
TCGA-AY-A54L-01	525	0	-0.558237	L
TCGA-DC-5337-01	792	0	-0.544979	L
TCGA-AA-3697-01	2587	0	-0.540925	L
TCGA-A6-6140-01	734	0	-0.533877	L
TCGA-AZ-4684-01	1977	0	-0.533154	L
TCGA-AZ-4315-01	1776	0	-0.530039	L
TCGA-AA-A01Z-01	1126	0	-0.529089	L
TCGA-CK-6747-01	2523	0	-0.524734	L
TCGA-AZ-5407-01	2683	0	-0.524264	L
TCGA-D5-5540-01	1706	0	-0.518915	L
TCGA-AA-3675-01	1431	0	-0.517922	L
TCGA-AA-3502-01	1065	0	-0.517907	L
TCGA-DC-5869-01	943	0	-0.51339	L
TCGA-CM-6677-01	337	0	-0.512633	L
TCGA-DM-A28E-01	3648	0	-0.51052	L
TCGA-CK-5914-01	669	0	-0.508714	L
TCGA-DC-6157-01	1581	0	-0.50723	L
TCGA-D5-6920-01	377	0	-0.497979	L
TCGA-DM-A28G-01	1849	1	-0.497733	L
TCGA-QG-A5YW-01	896	0	-0.496673	L
TCGA-AY-A69D-01	543	0	-0.490592	L
TCGA-A6-5666-01	995	0	-0.479295	L
TCGA-AH-6897-01	804	0	-0.477573	L
TCGA-CK-4952-01	475	0	-0.476336	L
TCGA-AF-5654-01	512	1	-0.475272	L
TCGA-QG-A5YV-01	1301	0	-0.474186	L
TCGA-G4-6293-01	4051	0	-0.470206	L
TCGA-CK-5912-01	1493	1	-0.468678	L
TCGA-CA-5796-01	377	0	-0.467863	L
TCGA-CM-6171-01	427	0	-0.466926	L
TCGA-T9-A92H-01	362	0	-0.4659	L
TCGA-AU-6004-01	824	0	-0.450386	L
TCGA-AG-3592-01	1035	0	-0.44649	L
TCGA-CI-6620-01	1009	0	-0.44303	L
TCGA-D5-6539-01	380	0	-0.436414	L
TCGA-DM-A0X9-01	3641	0	-0.42979	L
TCGA-G4-6304-01	1631	0	-0.429054	L
TCGA-AG-3731-01	1126	0	-0.426801	L
TCGA-DM-A28M-01	2895	0	-0.423285	L
TCGA-G4-6315-01	1883	0	-0.414538	L
TCGA-G4-6628-01	2424	0	-0.413652	L
TCGA-A6-6650-01	627	0	-0.412197	L
TCGA-F5-6861-01	1160	0	-0.411554	L
TCGA-DC-4749-01	762	0	-0.411369	L
TCGA-CM-6165-01	488	0	-0.408814	L
TCGA-D5-6533-01	775	0	-0.405475	L
TCGA-CA-6717-01	388	0	-0.402681	L
TCGA-CM-6172-01	335	0	-0.399363	L
TCGA-D5-6541-01	474	0	-0.395914	L
TCGA-DM-A28K-01	2988	0	-0.395684	L
TCGA-G4-6588-01	796	0	-0.393608	L
TCGA-G4-6295-01	254	0	-0.391489	L
TCGA-CM-6161-01	457	0	-0.391355	L
TCGA-A6-6652-01	751	0	-0.389833	L
TCGA-QL-A97D-01	666	0	-0.388725	L
TCGA-AA-A02Y-01	1216	0	-0.385605	L
TCGA-A6-2684-01	1127	0	-0.382411	L
TCGA-G4-6309-01	2600	0	-0.381591	L
TCGA-CI-6624-01	1466	0	-0.380528	L
TCGA-A6-5665-01	671	0	-0.379518	L
TCGA-A6-A567-01	1881	1	-0.377375	L
TCGA-A6-6780-01	612	0	-0.376805	L
TCGA-CM-6168-01	395	0	-0.374803	L
TCGA-D5-6530-01	621	0	-0.373735	L
TCGA-DM-A1D7-01	405	1	-0.373524	L
TCGA-AH-6549-01	532	0	-0.364072	L
TCGA-A6-A56B-01	1711	1	-0.362184	L
TCGA-AA-3496-01	31	0	-0.353643	L
TCGA-DC-6160-01	1339	0	-0.352612	L
TCGA-EI-6881-01	499	0	-0.350723	L
TCGA-A6-6137-01	824	0	-0.348555	L
TCGA-AD-6889-01	2532	1	-0.347997	L
TCGA-EI-6506-01	625	0	-0.345872	L
TCGA-EF-5831-01	127	0	-0.345205	L
TCGA-EI-6917-01	531	0	-0.344755	L
TCGA-CI-6622-01	1362	0	-0.344524	L
TCGA-D5-6532-01	555	0	-0.344096	L
TCGA-CL-4957-01	425	0	-0.342908	L
TCGA-CK-4951-01	2134	1	-0.341653	L
TCGA-CM-6162-01	365	0	-0.333151	L
TCGA-CM-6674-01	394	0	-0.333126	L
TCGA-D5-5541-01	1701	0	-0.331831	L
TCGA-D5-6898-01	229	0	-0.330549	L
TCGA-CK-5913-01	1561	0	-0.326932	L
TCGA-A6-5667-01	887	0	-0.326186	L
TCGA-G5-6235-01	1696	0	-0.325534	L
TCGA-A6-2675-01	1321	0	-0.321909	L
TCGA-AZ-6608-01	59	1	-0.320173	L
TCGA-AG-3742-01	30	0	-0.316282	L
TCGA-QG-A5Z2-01	952	0	-0.307127	L
TCGA-AZ-5403-01	1910	1	-0.304866	L
TCGA-RU-A8FL-01	1177	0	-0.302604	L
TCGA-D5-5538-01	1661	1	-0.299669	L
TCGA-DM-A1D9-01	4270	0	-0.294648	L
TCGA-CA-5256-01	379	0	-0.292201	L
TCGA-G4-6303-01	2003	1	-0.292185	L
TCGA-AA-3495-01	1127	0	-0.288934	L
TCGA-CK-4950-01	2599	0	-0.286422	L
TCGA-DC-6158-01	334	1	-0.285556	L
TCGA-DM-A1D8-01	383	1	-0.283074	L
TCGA-AA-3655-01	1856	0	-0.282718	L
TCGA-EI-6510-01	556	0	-0.277643	L
TCGA-D5-6923-01	378	0	-0.270843	L
TCGA-DM-A28H-01	3561	0	-0.270432	L
TCGA-F4-6806-01	1260	0	-0.267684	L
TCGA-CA-6715-01	383	0	-0.264244	L
TCGA-D5-6931-01	365	0	-0.261858	L
TCGA-AF-6136-01	741	0	-0.260775	L
TCGA-D5-6537-01	146	1	-0.259821	L
TCGA-NH-A5IV-01	588	0	-0.251067	L
TCGA-F5-6465-01	1506	0	-0.249013	L
TCGA-A6-6141-01	255	0	-0.248886	L
TCGA-AD-5900-01	370	0	-0.24315	L
TCGA-CA-6719-01	435	0	-0.24236	L
TCGA-CI-6619-01	184	0	-0.238271	L
TCGA-CK-4948-01	4502	0	-0.23706	L
TCGA-CM-5864-01	457	0	-0.23351	L
TCGA-DC-6682-01	762	0	-0.230812	L
TCGA-AF-2687-01	1427	0	-0.228571	L
TCGA-AA-3526-01	580	0	-0.227723	L
TCGA-G4-6323-01	419	0	-0.224528	L
TCGA-F4-6805-01	1047	0	-0.224235	L
TCGA-CI-6621-01	419	0	-0.219751	L
TCGA-AA-3663-01	212	0	-0.219432	L
TCGA-DC-4745-01	639	0	-0.218047	L
TCGA-AZ-4313-01	2310	0	-0.217658	L
TCGA-CA-6716-01	371	0	-0.216139	L
TCGA-AY-5543-01	1004	0	-0.211545	L
TCGA-CA-5797-01	383	0	-0.210835	L
TCGA-CM-6170-01	457	0	-0.208195	L
TCGA-D5-7000-01	312	0	-0.205987	L
TCGA-AZ-6601-01	3042	1	-0.203559	L
TCGA-EI-6884-01	328	0	-0.198824	L
TCGA-AA-3509-01	1915	0	-0.19836	L
TCGA-AZ-6606-01	357	1	-0.197675	L
TCGA-DC-6683-01	762	0	-0.193503	L
TCGA-D5-6927-01	287	0	-0.193034	L
TCGA-CM-4744-01	609	0	-0.188369	L
TCGA-F4-6463-01	1087	0	-0.185136	L
TCGA-D5-6529-01	614	0	-0.185071	L
TCGA-F4-6569-01	1087	0	-0.183742	L
TCGA-A6-6653-01	742	0	-0.180385	L
TCGA-CM-6163-01	427	0	-0.178911	L
TCGA-AH-6547-01	76	1	-0.171757	L
TCGA-AH-6644-01	838	0	-0.167583	L
TCGA-F5-6571-01	1288	0	-0.166772	L
TCGA-CM-6169-01	396	0	-0.166453	L
TCGA-G4-6625-01	2792	0	-0.165203	L
TCGA-CM-6680-01	366	0	-0.164635	L
TCGA-G5-6641-01	804	0	-0.164063	L
TCGA-DM-A1DB-01	1348	1	-0.163661	L
TCGA-AG-3725-01	638	0	-0.163148	L
TCGA-CM-5860-01	974	0	-0.163042	L
TCGA-F4-6856-01	1074	0	-0.158386	L
TCGA-NH-A50V-01	588	0	-0.154464	L
TCGA-F5-6814-01	1131	0	-0.152087	L
TCGA-DM-A1HB-01	4126	0	-0.150097	L
TCGA-DM-A1D4-01	2821	1	-0.14942	L
TCGA-D5-6922-01	308	0	-0.146646	L
TCGA-AZ-6599-01	206	1	-0.145083	L
TCGA-A6-4105-01	442	1	-0.141203	L
TCGA-NH-A6GB-01	476	0	-0.140684	L
TCGA-AD-A5EK-01	500	0	-0.138973	L
TCGA-AZ-4682-01	680	1	-0.133911	L
TCGA-DM-A1D6-01	1518	1	-0.131942	L
TCGA-DM-A285-01	179	1	-0.131123	L
TCGA-A6-A566-01	758	1	-0.128857	L
TCGA-AD-6548-01	650	0	-0.127777	L
TCGA-G4-6320-01	804	0	-0.125612	L
TCGA-EI-6885-01	415	0	-0.124228	L
TCGA-DY-A0XA-01	3846	0	-0.123516	L
TCGA-CM-6166-01	669	0	-0.122946	L
TCGA-F4-6808-01	1024	0	-0.119956	L
TCGA-G4-6317-01	1095	0	-0.119459	L
TCGA-F4-6807-01	1309	0	-0.118274	L
TCGA-NH-A8F7-06	543	0	-0.117052	L
TCGA-AF-A56L-01	2007	0	-0.116482	L
TCGA-A6-5660-01	888	0	-0.115238	L
TCGA-F5-6811-01	979	0	-0.113897	L
TCGA-CL-5917-01	2376	0	-0.112473	L
TCGA-WS-AB45-01	2130	0	-0.111452	L
TCGA-AY-A71X-01	588	0	-0.109105	L
TCGA-A6-5664-01	672	0	-0.107727	L
TCGA-F4-6855-01	1442	0	-0.104988	L
TCGA-SS-A7HO-01	1829	0	-0.1049	L
TCGA-A6-2682-01	424	1	-0.104074	H
TCGA-DM-A28F-01	1094	1	-0.103777	H
TCGA-EF-5830-01	106	0	-0.10278	H
TCGA-AF-6655-01	609	0	-0.0944253	H
TCGA-QG-A5Z1-01	256	1	-0.0937695	H
TCGA-CM-6676-01	337	0	-0.0935265	H
TCGA-A6-6138-01	685	0	-0.091479	H
TCGA-G4-6321-01	672	0	-0.0848609	H
TCGA-DM-A280-01	236	1	-0.0821288	H
TCGA-CM-5861-01	457	0	-0.0804324	H
TCGA-CM-4747-01	761	0	-0.0779729	H
TCGA-D5-6538-01	521	0	-0.0774052	H
TCGA-AA-3506-01	1765	0	-0.077198	H
TCGA-AD-6963-01	834	0	-0.0771715	H
TCGA-A6-A565-01	494	1	-0.0766556	H
TCGA-AG-4021-01	121	1	-0.0763048	H
TCGA-AZ-6600-01	368	1	-0.0761468	H
TCGA-AH-6544-01	1173	0	-0.0761365	H
TCGA-EI-6512-01	538	0	-0.0753545	H
TCGA-DC-6681-01	790	0	-0.0733444	H
TCGA-D5-6535-01	460	0	-0.0694487	H
TCGA-EI-6513-01	497	0	-0.0668559	H
TCGA-F5-6812-01	1110	0	-0.0627001	H
TCGA-D5-5539-01	596	0	-0.0566323	H
TCGA-AZ-6598-01	1503	1	-0.0564504	H
TCGA-EI-6514-01	496	0	-0.0556904	H
TCGA-AA-3511-01	212	0	-0.0538586	H
TCGA-F5-6702-01	452	0	-0.0495785	H
TCGA-5M-AATE-01	1200	0	-0.0486981	H
TCGA-G4-6306-01	1359	0	-0.0477542	H
TCGA-AA-3489-01	214	1	-0.0401237	H
TCGA-G4-6627-01	2275	0	-0.0388103	H
TCGA-AA-3685-01	1127	0	-0.0381371	H
TCGA-AG-4022-01	1400	0	-0.0336741	H
TCGA-EI-6507-01	607	0	-0.0307424	H
TCGA-4T-AA8H-01	385	0	-0.02914	H
TCGA-A6-5659-01	926	0	-0.0268278	H
TCGA-CL-5918-01	218	0	-0.0236357	H
TCGA-D5-6926-01	275	0	-0.0228513	H
TCGA-AF-6672-01	748	0	-0.0190969	H
TCGA-G4-6626-01	1422	1	-0.017755	H
TCGA-AD-6964-01	331	1	-0.0146984	H
TCGA-G4-6297-01	2506	0	-0.0140563	H
TCGA-F5-6813-01	598	1	-0.0134827	H
TCGA-A6-6654-01	726	0	-0.0125039	H
TCGA-D5-6932-01	346	0	-0.00270646	H
TCGA-CM-4743-01	701	0	-0.00171289	H
TCGA-AY-A8YK-01	573	0	-0.00159112	H
TCGA-D5-6928-01	354	0	-0.00106986	H
TCGA-F4-6459-01	262	1	0.000278026	H
TCGA-EI-6511-01	482	0	0.00385254	H
TCGA-AM-5821-01	28	0	0.0039144	H
TCGA-AA-A01X-01	791	0	0.00544572	H
TCGA-A6-5656-01	1001	0	0.00855035	H
TCGA-D5-6929-01	408	0	0.00930399	H
TCGA-AD-6890-01	746	0	0.0125117	H
TCGA-AA-A01P-01	1158	1	0.0139248	H
TCGA-DM-A28A-01	805	1	0.0139531	H
TCGA-DM-A1D0-01	3974	0	0.0150818	H
TCGA-EI-6509-01	517	0	0.0194889	H
TCGA-CM-6678-01	335	0	0.026949	H
TCGA-AA-3662-01	184	0	0.0291496	H
TCGA-AZ-6605-01	159	1	0.0299895	H
TCGA-D5-6930-01	406	0	0.0342115	H
TCGA-AF-3911-01	1148	0	0.0349671	H
TCGA-G4-6294-01	858	1	0.036515	H
TCGA-DM-A0XF-01	1162	1	0.0380354	H
TCGA-G4-6314-01	1093	0	0.0396349	H
TCGA-DM-A288-01	427	1	0.0442273	H
TCGA-AH-6643-01	1314	1	0.0444793	H
TCGA-AG-3902-01	974	0	0.0445275	H
TCGA-AZ-6603-01	899	1	0.0452367	H
TCGA-G4-6307-01	1674	0	0.0490759	H
TCGA-5M-AAT4-01	49	1	0.0505081	H
TCGA-CA-5254-01	386	0	0.0512212	H
TCGA-G4-6302-01	2047	1	0.0514322	H
TCGA-AF-2693-01	1155	0	0.0546551	H
TCGA-D5-6540-01	491	0	0.0550695	H
TCGA-AF-A56N-01	360	0	0.0567348	H
TCGA-AF-2690-01	524	1	0.0591087	H
TCGA-AG-3591-01	1035	0	0.0612512	H
TCGA-CM-5868-01	518	0	0.0623302	H
TCGA-AA-3660-01	2375	0	0.0627089	H
TCGA-F4-6854-01	16	0	0.0661252	H
TCGA-CM-4751-01	822	0	0.0686518	H
TCGA-AD-6965-01	805	0	0.0706222	H
TCGA-CM-6164-01	883	0	0.0744565	H
TCGA-CA-6718-01	306	1	0.0748216	H
TCGA-EI-6883-01	350	0	0.0757694	H
TCGA-AM-5820-01	14	0	0.0764891	H
TCGA-A6-5662-01	718	0	0.0792027	H
TCGA-F4-6703-01	1456	0	0.0827661	H
TCGA-CM-6167-01	456	0	0.0877969	H
TCGA-D5-6531-01	540	0	0.0911831	H
TCGA-AF-4110-01	912	0	0.0916644	H
TCGA-A6-2685-01	1133	0	0.0923947	H
TCGA-DC-6154-01	365	0	0.0938005	H
TCGA-G4-6311-01	1199	0	0.0947665	H
TCGA-DC-6156-01	943	0	0.09492	H
TCGA-AU-3779-01	441	0	0.0955078	H
TCGA-G5-6233-01	556	1	0.098095	H
TCGA-G4-6322-01	792	0	0.0995122	H
TCGA-F5-6864-01	379	0	0.100575	H
TCGA-AF-A56K-01	2635	0	0.103467	H
TCGA-CA-5255-01	376	0	0.104643	H
TCGA-G4-6299-01	2268	0	0.105912	H
TCGA-G4-6310-01	1935	0	0.1069	H
TCGA-CM-5349-01	915	0	0.119431	H
TCGA-AA-A02K-01	426	1	0.119747	H
TCGA-5M-AAT6-01	290	1	0.128423	H
TCGA-DM-A282-01	4233	0	0.129344	H
TCGA-CM-5863-01	457	0	0.134966	H
TCGA-CM-6675-01	397	0	0.136338	H
TCGA-EI-6508-01	636	0	0.138587	H
TCGA-G5-6572-02	1432	1	0.140717	H
TCGA-F4-6570-01	188	1	0.143057	H
TCGA-DM-A1DA-01	228	1	0.143093	H
TCGA-AG-3732-01	1003	0	0.145526	H
TCGA-CM-6679-01	306	0	0.146421	H
TCGA-A6-A5ZU-01	293	0	0.147154	H
TCGA-F4-6461-01	338	1	0.152744	H
TCGA-A6-6649-01	735	0	0.157771	H
TCGA-DY-A1DG-01	1566	1	0.158632	H
TCGA-4N-A93T-01	146	0	0.176191	H
TCGA-NH-A50U-01	334	1	0.177139	H
TCGA-D5-6924-01	435	0	0.177767	H
TCGA-CK-6748-01	61	0	0.184921	H
TCGA-DY-A1DE-01	3932	0	0.187202	H
TCGA-3L-AA1B-01	475	0	0.187897	H
TCGA-DY-A1DC-01	1258	1	0.203064	H
TCGA-DM-A0XD-01	743	1	0.208641	H
TCGA-A6-5657-01	962	0	0.216039	H
TCGA-AZ-4615-01	1002	0	0.218066	H
TCGA-CM-5862-01	153	1	0.221778	H
TCGA-D5-6534-01	1316	0	0.226897	H
TCGA-A6-6781-01	598	0	0.228322	H
TCGA-G4-6586-01	1089	0	0.240432	H
TCGA-G4-6298-01	715	1	0.240441	H
TCGA-F5-6464-01	303	1	0.257642	H
TCGA-AY-6196-01	6	0	0.265493	H
TCGA-D5-5537-01	1381	1	0.266135	H
TCGA-NH-A6GA-01	302	1	0.270349	H
TCGA-F4-6704-01	47	0	0.274361	H
TCGA-CM-5344-01	670	0	0.276603	H
TCGA-NH-A8F8-01	511	1	0.278744	H
TCGA-D5-6536-01	543	0	0.280307	H
TCGA-A6-6651-01	662	0	0.295622	H
TCGA-EI-7002-01	364	0	0.301487	H
TCGA-EI-7004-01	257	0	0.304418	H
TCGA-F4-6809-01	403	1	0.31372	H
TCGA-A6-6782-01	617	0	0.314617	H
TCGA-F4-6460-01	972	1	0.327383	H
TCGA-A6-6142-01	763	0	0.329412	H
TCGA-DY-A1H8-01	992	1	0.334956	H
TCGA-AD-6895-01	763	0	0.335141	H
TCGA-AD-6899-01	176	1	0.345758	H
TCGA-AD-6901-01	682	1	0.348976	H
TCGA-AZ-6607-01	97	1	0.356795	H
TCGA-CM-5348-01	699	0	0.371213	H
TCGA-BM-6198-01	646	0	0.379434	H
TCGA-AD-6888-01	472	1	0.384393	H
TCGA-NH-A6GC-01	389	0	0.396917	H
TCGA-AZ-4616-01	156	1	0.41277	H
TCGA-AZ-4323-01	43	1	0.446277	H
TCGA-F5-6863-01	361	1	0.459293	H
TCGA-DM-A1HA-01	4000	0	0.509692	H
TCGA-A6-2686-01	1126	1	0.527601	H
TCGA-AZ-4614-01	172	1	0.560391	H
TCGA-DC-6155-01	425	0	0.62416	H
TCGA-DY-A1DD-01	1741	1	0.654383	H
TCGA-DT-5265-01	384	0	0.694988	H
TCGA-DY-A1DF-01	734	1	0.788382	H
